# Supplementary material for: The Impact of COVID-19 on Sport in Twitter: A Quantitative and Qualitative Content Analysis
Source: Int J Environ Res Public Health. 2021 Apr 25;18(9):4554. doi: 10.3390/ijerph18094554 (PMC8123335; doi:10.3390/ijerph18094554)
Supplement: Supplementary file 1 [file ijerph-18-04554-s001.zip]

Archive with 6 entries (6 files):
- Data S1__id.txt
- Figure S1_retweets_distribution.png
- Table S1_ngrams.xlsx
- Table S2_centrality values.xlsx
- Table S3_top_word_topic_LDA.xlsx
- Table S4_example of tweets emerged.pdf
