# Supplementary material for: The Impact of COVID-19 on Sport in Twitter: A Quantitative and Qualitative Content Analysis
Source: Int J Environ Res Public Health. 2021 Apr 25;18(9):4554. doi: 10.3390/ijerph18094554 (PMC8123335; doi:10.3390/ijerph18094554)
Supplement: Supplementary file 1 [file ijerph-18-04554-s001.zip › Data S1__id.txt]

1234585665242722304
1234585447407521792
1234584948662648832
1234584508323762176
1234583772500090880
1234583240360460288
1234583083325763584
1234582931601076224
1234582559478120448
1234582091423240192
1234582007289483264
1234580759521964032
1234579783088050176
1234579229322420224
1234578803470536704
1234577508613459968
1234577243466235904
1234577116169228288
1234576729160605696
1234576522989596672
1234575593624096768
1234575591401127936
1234575223145369600
1234574839773528064
1234574511476899840
1234574351212728320
1234574209336008704
1234574054188834816
1234574043585679360
1234573957497409536
1234573449877737472
1234573344713867264
1234573091621216256
1234572697989894144
1234571720037748736
1234571449429450752
1234571175231131648
1234570366032502784
1234570207332569088
1234570203163512832
1234570190295355392
1234570188206563328
1234569450009112576
1234569178503417856
1234568456630161408
1234568247103643648
1234567384981262336
1234567254018338816
1234566441938096128
1234566161460801536
1234566152853938176
1234566058637393920
1234566047853883392
1234565161261899776
1234564906650914816
1234564662211072000
1234564342118592512
1234563747643039744
1234563651618648064
1234563289700454400
1234563259866308608
1234562621749239808
1234562500689121280
1234562480149598208
1234561705448919040
1234561253395193856
1234560485749600256
1234559377761357824
1234559254553677824
1234558965918437376
1234558628167811072
1234558314522054656
1234557845317836800
1234556877603733504
1234556253675950080
1234556161439027200
1234555883759292416
1234555869913808896
1234555295277473792
1234555199760601088
1234555112078610432
1234555104734437376
1234555094445764608
1234554614395088896
1234554197170892800
1234554152547647488
1234553619946639360
1234551314924941312
1234550861906333696
1234550811364974592
1234549029993766912
1234547692367380480
1234546978408804352
1234546966123761664
1234546513398788096
1234545719945629696
1234544564528205824
1234543996938211328
1234543937920086016
1234543835465867264
1234543386213933056
1234543243594956800
1234543068570955776
1234542856175575040
1234542808972890112
1234541997110722560
1234541553441439744
1234540516856999936
1234540391149514752
1234540336711598080
1234540321918390272
1234539601231921152
1234539577668403200
1234539561440743424
1234539520705646592
1234538502903226368
1234538467226529792
1234537607499042816
1234537547008823296
1234537227239251968
1234536824028237824
1234536562693738496
1234536376676294656
1234535900194967552
1234535694007242752
1234535538495021056
1234535074541867008
1234534968606412800
1234533930650333184
1234533692711636992
1234533623660810240
1234533420132446208
1234533045325238272
1234532306636939264
1234531708558626816
1234531554149298176
1234531413829017600
1234531351338082304
1234531271847612416
1234529912897310720
1234529485103517696
1234527352035692544
1234527123802599424
1234527026465230848
1234526155677433856
1234526152229736448
1234525997346836480
1234525760032997376
1234524959051067392
1234524892948762624
1234523907312508928
1234522911781900288
1234522716213932032
1234522653307920384
1234522220602503168
1234522031665958912
1234521353048514560
1234521347591589888
1234520451667386368
1234520401025359872
1234520125077893120
1234519971222282240
1234519662702014464
1234518994217918464
1234518730215972864
1234517931087802368
1234517153723944960
1234517089727270912
1234516954007818240
1234516451878428672
1234516362589900800
1234516349654904832
1234516277823184896
1234516219967004672
1234515752063053824
1234515615328632832
1234515594885632000
1234513600527683584
1234513484710326272
1234512539704184832
1234512284283621376
1234511871962689536
1234511259615289344
1234510830823063552
1234510785050640384
1234510635989393408
1234510604095938560
1234510416237096960
1234510191049297920
1234509513748860928
1234509093223780352
1234508828529627136
1234508755548725248
1234508467295092736
1234508431521964032
1234508065170391040
1234508040776192000
1234506828161134592
1234506549374136320
1234506274928238592
1234506219773026304
1234505675906174976
1234505304659898368
1234504460711407616
1234503552762028032
1234503546013437952
1234502175944007680
1234501810221613056
1234500965069393920
1234499879713546240
1234499241059504128
1234498698459144192
1234498516183064576
1234498244408958976
1234497844205293568
1234496947207180288
1234496672794841088
1234496637722124288
1234495796139053056
1234494461343928320
1234494199816499200
1234494062834724864
1234493769405300736
1234493262104186880
1234492763070238720
1234492527459422208
1234492471528300544
1234491974960414720
1234490768653455360
1234490476989837312
1234489982733123584
1234489567606124544
1234489223849369600
1234488632091635712
1234488398708166656
1234487252153184256
1234486892520931328
1234486361417080832
1234485869270249472
1234484934741516288
1234484521556418560
1234482638980816896
1234482440103591936
1234481802586329088
1234481612345053184
1234481462243663872
1234480894741811200
1234479610982694912
1234479592167137280
1234479546814095360
1234478383867875328
1234477741916901376
1234476484653387776
1234476351161282560
1234476033958727680
1234475956406046720
1234475566469976064
1234475566335655936
1234475029548564480
1234474813604888576
1234474790913740800
1234474766704181248
1234474729739882496
1234474497543151616
1234474006608306176
1234473841562464256
1234473366133841920
1234471168255692800
1234471129395408896
1234469638601183232
1234468818044489728
1234468002952859648
1234467008470822912
1234466243383525376
1234465982808195072
1234465700858793984
1234465619006779392
1234464233988837376
1234464125901819904
1234463999263223808
1234463812323086336
1234463110079139840
1234462668817412096
1234462276851245056
1234460713617371136
1234459731286204416
1234459050479407104
1234458529555243008
1234458346536738816
1234457887289810944
1234457860324630528
1234456913628291072
1234456723882217472
1234456487944216576
1234456078190030848
1234456073362432000
1234455964625068032
1234455607383613440
1234455561783185408
1234455302449221632
1234455285483343872
1234455195427508224
1234454541967482880
1234454186374221824
1234453507694112768
1234453491399176192
1234452437513261056
1234451468427526144
1234450884702199808
1234450508615544832
1234449638549262336
1234449480612745216
1234448760534491136
1234448739823165440
1234447963629477888
1234447696032862208
1234446544696467456
1234445428688670720
1234445141869461504
1234444146485714944
1234443367179833344
1234442519045427200
1234441155481415680
1234439952399663104
1234439924277010432
1234438659337793536
1234438657303629824
1234438339329019904
1234438332345671680
1234438072390959104
1234437324206985216
1234437188387033088
1234435112374341632
1234434293528743936
1234433511987335168
1234432805377015808
1234432687710056448
1234431433634127872
1234430671315251200
1234430613077270528
1234430041158713344
1234429475678326784
1234429418107482112
1234429126561402880
1234427893322743808
1234427837723107328
1234427705740886016
1234427681338511360
1234427566762659840
1234427112376983552
1234426508531335168
1234425762687655936
1234425349582118912
1234425264014348288
1234424850036465664
1234424034751844352
1234422971294527488
1234422672580325376
1234422623427321856
1234421561307926528
1234421516391108608
1234420908225253376
1234420485984641024
1234420150620901376
1234418956896735232
1234418790365941760
1234418209144672256
1234418189125156864
1234417718230544384
1234413852458131456
1234413693577912320
1234412823318581248
1234412008797360128
1234411429308096512
1234410673695645696
1234410604829511680
1234408223400218624
1234406604734423040
1234406571049914368
1234405086979334144
1234404481548222464
1234403618406764544
1234403117426466816
1234402681533366272
1234401782836715520
1234401148565688320
1234399379211116544
1234399312576229376
1234397850223685632
1234397234080440320
1234395276305149952
1234394768450433024
1234394026771722240
1234393770692685824
1234393246517911552
1234392538259345408
1234392365764403200
1234391422297673728
1234390272211128320
1234390191311179776
1234389288529408000
1234388996605849600
1234387991583391744
1234387167411130368
1234385875758407680
1234385842753290240
1234385452121063424
1234385337469693952
1234385208352411648
1234384893611659264
1234383629704466432
1234383538171940864
1234381760516878336
1234381313584615424
1234380419480449024
1234378659504566272
1234377508671197184
1234375476547932160
1234375286227165184
1234374569395412992
1234374374150590464
1234373992397582336
1234373875896471552
1234372869158649856
1234372558264209408
1234372184073801728
1234370957780770816
1234370201686364160
1234370007158710272
1234369096046780416
1234366237527945216
1234365373648179200
1234365177107226624
1234364050621882368
1234362992910794752
1234359753796546560
1234357808616943616
1234353553545793536
1234352206377299968
1234350488830824448
1234347511403491328
1234346149420527616
1234345262488920064
1234345215777034240
1234344948658573312
1234340037833084928
1234339200620736512
1234333961125384192
1234333713548402688
1234331869375647744
1234323100369637376
1234319376104534016
1234317807979986944
1234312869891600384
1234312041520779264
1234310116742176768
1234309283866607616
1234307921619668992
1234307061774782464
1234304646518312960
1234302922386624512
1234302190606585856
1234301031544053760
1234298977199194112
1234298463761752064
1234293970143866880
1234293024517165056
1234292105503215616
1234291295390068736
1234289659741499392
1234287325284143104
1234285373506781184
1234284346284048384
1234283669621075968
1234281081693757440
1234277587163074560
1234275698161770496
1234275612421844992
1234270461430599680
1234263490044538880
1234262305250119680
1234261111668527104
1234260701809532928
1234260648856473600
1234260643160764416
1234260134358081536
1234259013342240768
1234257990712164352
1234255965702090752
1234255733014720512
1234254503760846848
1234252074508070912
1234249162465718272
1234248857405526016
1234248558179520512
1234248406270345216
1234248073314000896
1234248034579599360
1234245047685668864
1234242096707534848
1234240748725268480
1234240741775298560
1234240507317903360
1234240269253398528
1234237878810660864
1234237683888721920
1234235913804406784
1234234873889591296
1234234644062777344
1234233652894195712
1234233212760657920
1234232866663362560
1234232482142281728
1234231701330710528
1234229030548889600
1234228958738157568
1234228155377999872
1234227433173209088
1234226695621705728
1234225926314979328
1234224563606691840
1234222123616555008
1234221902073389056
1234221883211440128
1234221874592149504
1234221510052564992
1234218860972109824
1234218715400544256
1234217350955708416
1234216133684756480
1234215057233453056
1234214564834816000
1234214079079895040
1234213769863147520
1234212508111691776
1234212209363865600
1234211017770430464
1234210855589380096
1234210625263456256
1234210211600195584
1234210157334151168
1234210096395309056
1234209731004321792
1234209024087859200
1234208878520406016
1234207338141233152
1234206969210130432
1234206928886280192
1234206832115105792
1234205572112814080
1234205154770948096
1234204432004501504
1234202141260165120
1234201755908497408
1234200532484546560
1234196509136236544
1234196499506061312
1234196025193238528
1234195724054794240
1234194037306994688
1234193489002401792
1234191814908928000
1234190576985178112
1234189696009482240
1234189607203418112
1234188141373919232
1234186952582275072
1234186708150865920
1234186609689583616
1234185713299705856
1234185700494528512
1234185399259586560
1234185008031531008
1234184888762458112
1234184674315886592
1234184389296181248
1234184079546798080
1234182881951526912
1234182880873635840
1234182853757407232
1234182728737787904
1234180874893189120
1234180350961758208
1234177977660801024
1234177359542128640
1234176662750875648
1234176618240860160
1234173589273894912
1234173253351952384
1234171172566323200
1234171069294096384
1234170231804833792
1234170046617923584
1234169253160456192
1234169222508531712
1234169148659335168
1234167468698062848
1234167460691050496
1234167039293640704
1234167036382720000
1234166746652794880
1234164677946609664
1234164236437377024
1234162959628283904
1234162541762433024
1234162437999513600
1234162262883160064
1234161511532236800
1234161477684084736
1234161476954251264
1234160531797422080
1234159889439772672
1234159444998676480
1234158716334878720
1234158200825565184
1234158026183135232
1234157889046142976
1234156142047252480
1234155072155574272
1234154769754869760
1234154182543921152
1234153722697043968
1234152643985014784
1234148510414622720
1234148427279278080
1234146310044966912
1234145760993693696
1234144640997216256
1234144547275337728
1234144210464509952
1234143961071181824
1234143934454124544
1234143847183155200
1234142991289344000
1234142959228071936
1234142621666283520
1234142439448903680
1234141636734672896
1234140814332264448
1234139632163577856
1234138879474774016
1234138827955957760
1234138358621908992
1234137865325568000
1234137325640261632
1234136483767967744
1234134425992093696
1234134051902164992
1234133938873995264
1234133259203874816
1234132674618384384
1234132057414078464
1234132051575615488
1234131774948724736
1234130020496498688
1234128404527497216
1234127175348973568
1234126760922566656
1234125812594593792
1234125748748701696
1234124674067361792
1234123438870204416
1234123210813329408
1234121424316571648
1234120673443729408
1234120219217383424
1234119235217084416
1234118583770374144
1234117216750198784
1234116180878725120
1234115779156750336
1234114702021713920
1234114352086687744
1234114017683218432
1234109954807750656
1234109954740674560
1234109232099856384
1234107320042434560
1234106664149602304
1234105711170375680
1234105141923581952
1234104933265399808
1234103155811635200
1234103104817242112
1234100475848462336
1234100222407651328
1234099269386240000
1234096814388924416
1234096745216401408
1234092755225210880
1234091112232558592
1234087988168015872
1234086375483420672
1234086095245205504
1234085236260077568
1234084435886247936
1234084079533989888
1234082766771322880
1234082718297640960
1234082265304641536
1234082095322062848
1234081974052098048
1234080042851934208
1234079077809651712
1234078159508824064
1234075222569037824
1234075183020986368
1234074647781629952
1234074557138513920
1234073404103438336
1234072808877109248
1234072719047610368
1234072254184591360
1234072109334302720
1234071935551668224
1234069606270193664
1234068735784366080
1234068614468247552
1234068614464131072
1234068081577791488
1234067919287603200
1234067153260691456
1234066708513611776
1234066331223363584
1234065857980096512
1234064099308396544
1234062502012575744
1234062368621109248
1234061422092603392
1234060921800187904
1234060706624024576
1234060395012411392
1234058378235666432
1234057891566383104
1234057185379917824
1234056849789464576
1234056472591568896
1234056010962071552
1234055259510779904
1234055155085082624
1234054627844349952
1234054592247107584
1234053743672516608
1234053358371164160
1234052566075486208
1234052451738636288
1234051765936345088
1234051630103851008
1234050178568671232
1234047861207076864
1234046787197063168
1234045778563420160
1234045132770426880
1234044064321953792
1234042771973066752
1234038706064982016
1234037476823642112
1234035423648894976
1234034231447375872
1234033415596408832
1234033411897143296
1234033397468672000
1234031407153975296
1234031309636411392
1234029966196527104
1234029377882591232
1234028124335202304
1234025907297411072
1234025357071831040
1234023648664735744
1234022832272760832
1234019664788803584
1234018549863079936
1234018548793561088
1234017606077566976
1234015068708311040
1234014101925437440
1234010355270995968
1234008971968561152
1234007980409884672
1234006269863714816
1234004855724924928
1234002456536764416
1233999032231571456
1233998330579030016
1233995446521122816
1233993744275451904
1233992483937214464
1233991743017586688
1233991214992523264
1233987884685807616
1233985965359685632
1233982484636811264
1233980071779741696
1233978633938751488
1233972749313478656
1233971917050171392
1233971498857136128
1233968917992935424
1233964562279489536
1233963692972134400
1233959630793060352
1233955670208069632
1233953760155721728
1233950171286966272
1233948209732620288
1233945640796934144
1233942952281542656
1233940041619120128
1233939645399887872
1233939533118357504
1233937388046389248
1233935440912076800
1233935254517272576
1233934985481965568
1233934984932577280
1233930050879156224
1233929428679282688
1233925743110807552
1233920307599159296
1233917522874896384
1233913196492283904
1233911572076072960
1233907821923708928
1233903564591788032
1233901579662700544
1233899443453386752
1233894641239543808
1233894265404764160
1233891719701200896
1233891500955750400
1233891003112751104
1233889904494600192
1233889724378550272
1233886812201988096
1233886671751581696
1233886473142833152
1233886444675981312
1233886421036851200
1233885751089205248
1233884901369360384
1233874640319254528
1233874044883099648
1233873697943015424
1233873300314640384
1233873257494990848
1233871507455139840
1233870898144436224
1233869268653158400
1233867036100415488
1233866621732741120
1233865950652440576
1233864057620332544
1233863167391875072
1233863097464561664
1233862093096529920
1233861259319222272
1233860865407045632
1233860738294386688
1233856246647791616
1233855492545564672
1233854848682074112
1233854462843932672
1233853180166971392
1233851983729172480
1233851024789712896
1233850932187758592
1233850810150244352
1233850673059581952
1233850257282420736
1233849860513767424
1233849442719191040
1233844838036070400
1233844161650003968
1233843076348743680
1233842896660504576
1233840816210268160
1233840657988452352
1233837853278396416
1233834422744571904
1233833333286531072
1233832877588176896
1233832478424621056
1233830827445891072
1233830806793203712
1233829575425220608
1233829183836577792
1233828205326471168
1233827105923850240
1233826305751371776
1233826258259259392
1233824734523121664
1233823574512697344
1233823556611473408
1233823419675926528
1233823305276235776
1233822234365616128
1233821854361583616
1233821602019782656
1233819588275720192
1233819443161071616
1233819124826099712
1233814370456653824
1233811987123068928
1233810922319368192
1233810568030621696
1233810501013995520
1233810109081350144
1233809925689761792
1233809751298969600
1233809190310809600
1233807304115486720
1233807081993572352
1233806669886509056
1233806639506935808
1233805489261117440
1233804897956638720
1233804653382467584
1233804416442040320
1233803647886254080
1233803188383485952
1233802850444206080
1233801412628353024
1233799223411400704
1233799091194355712
1233798302128312320
1233797235865006080
1233796763116613632
1233794826769969152
1233794225180958720
1233793568612982784
1233793360990740480
1233792999445925888
1233792689428037632
1233792256861261824
1233791762696691712
1233791674540843008
1233791609352998912
1233790623112663040
1233790417142857728
1233789050244321280
1233788795440504832
1233788147298902016
1233788048690876416
1233786332159320064
1233784768950497280
1233784764169170944
1233784542374264832
1233783355793182720
1233780232747917312
1233779527647670272
1233777651913035776
1233777465589452800
1233777428885069824
1233775960807227392
1233775955782635520
1233773544884011008
1233772714617450496
1233772574557003776
1233772011840774144
1233769580734111744
1233769545841696768
1233767904816091136
1233766020537634816
1233765434396114944
1233762771050909696
1233762458004869120
1233761362414751744
1233758127813726208
1233756975068065792
1233756856352415744
1233756789369380864
1233756255589715968
1233754323038932992
1233753502129807360
1233752551113150464
1233752052930498560
1233751984592678912
1233751528789495808
1233751409562132480
1233751147791421440
1233750972209467392
1233750385891762176
1233750199450796032
1233748756857868288
1233748570194337792
1233747106944471040
1233746883505463296
1233746249133821952
1233746229563138048
1233746218871816192
1233744851415420928
1233744771295989760
1233744651175198720
1233743571104227328
1233743496097366016
1233743368716455936
1233742673225437184
1233741926010171392
1233741078228086784
1233740980647583744
1233740456271458304
1233740121406689280
1233739181400166400
1233738571028107264
1233738089467699200
1233735713168019456
1233735396636401664
1233735013478342656
1233734578755571712
1233733128541392896
1233732908889800704
1233732768540090368
1233732763712393216
1233731923782119424
1233731910070784000
1233731677396008960
1233731398361604096
1233731264802410496
1233731152017412096
1233730949323640832
1233730582636564480
1233730557516898304
1233730521739345920
1233729936046927872
1233729901964013568
1233729359892054016
1233729303432585216
1233729144753573888
1233729122007834624
1233728350344093696
1233728278646730752
1233728148220416000
1233727356239581184
1233727070297088000
1233725512075415552
1233725505511317504
1233725415597977600
1233725315815526400
1233724797240201216
1233724380787683328
1233724363947610112
1233724230077837312
1233723688874397696
1233723622943911936
1233723521743847424
1233723511249817600
1233723354365992960
1233722726805716992
1233722094946414592
1233721987794644992
1233718832436477952
1233718597329002496
1233717555203919872
1233717500233342976
1233717285459841024
1233716879728029696
1233716459718705152
1233716425174503424
1233715617221443584
1233714973441961984
1233714945604407296
1233714557136392192
1233714517630181376
1233713714123149312
1233713279224156160
1233713253269684224
1233711007970652160
1233709467247751168
1233709266659414016
1233709264763576320
1233708518542315520
1233707943956230144
1233707881590972416
1233707787416371200
1233707732399611904
1233707639730835456
1233707379214213120
1233705984364863488
1233704726585380864
1233703948944625664
1233703684741226496
1233703607230484480
1233703328946802688
1233702679395868672
1233701428893552640
1233700941607686144
1233700941603278848
1233699180163387392
1233698870871416832
1233698554306232320
1233698432658944000
1233697737025228800
1233697106080059392
1233696572044697600
1233696466750726144
1233696228053000192
1233696032577540096
1233695736069599232
1233695360393986048
1233695336784367616
1233693724900810752
1233693581900156928
1233693412018327552
1233691806107340800
1233690562286510080
1233690127823622144
1233690055664861184
1233689861355397120
1233689162630430720
1233687118850842624
1233686918698655744
1233686614918025216
1233685842427883520
1233685741277827072
1233685663318343680
1233685529746714624
1233685529700585472
1233685353409712128
1233684722016018432
1233684167470329856
1233683169838325760
1233681507668987904
1233681312478908416
1233680127810326528
1233679222532644864
1233678779094048768
1233678175940444160
1233677817331757056
1233677494957596672
1233677346386915328
1233677034213142528
1233676549745852416
1233676285798428672
1233676007644618752
1233675759799193600
1233673918134833152
1233672447318282240
1233672433112113152
1233670763267444736
1233669678872113152
1233668317363212288
1233668003155365888
1233667673592123392
1233667230233190400
1233666830914523136
1233665924575760384
1233665824780537856
1233665549105815552
1233664527973146624
1233663336958525440
1233663194733981696
1233662557547827200
1233662042239913984
1233661929404731392
1233660576443850752
1233660340988207104
1233660317181177856
1233659921394171904
1233659477376819200
1233659357222535168
1233657792495378432
1233657496587456512
1233655779837661184
1233655773772812288
1233655772078333952
1233654160769404928
1233653951188393984
1233653347116146688
1233652848195493888
1233651965621608448
1233650431051563008
1233649721681629184
1233649375588470784
1233648345144365056
1233648228282839040
1233647263337021440
1233647189093703680
1233646510681788416
1233646359221194752
1233643139702951936
1233642369930715136
1233640905615269888
1233640107900624896
1233638114003996672
1233637272261668864
1233637181861830656
1233636768919912448
1233636318950748160
1233634912642707456
1233634455593439232
1233633182492262400
1233631994707247104
1233629956091138048
1233628463636078592
1233628297101180928
1233626462298632192
1233626340072546304
1233625579942866944
1233625048382156800
1233623687481327616
1233622198566432768
1233619802712879104
1233619271739150336
1233616734277578752
1233613967899209728
1233613565967437824
1233612345592733696
1233612077455028224
1233609943103598592
1233602795061698560
1233601202295910400
1233599931371446272
1233599892607598592
1233599809937739776
1233598352815796224
1233597273314971648
1233595420493975552
1233595405377638400
1233594330058829824
1233593846845456384
1233591694056214528
1233590786010288128
1233589824449323008
1233587781793914880
1233583991489548288
1233583876942860288
1233581320799838208
1233580145635516416
1233576432925802496
1233576045841911808
1233575632333934592
1233575615892058112
1233571241640022016
1233569846744494080
1233569608671604736
1233567099127119872
1233566341795368960
1233565138864656384
1233559947729727488
1233559632859127808
1233559405351833600
1233557066083708928
1233556362673696768
1233556030635696128
1233553691845840896
1233553229616762880
1233549497181048832
1233547646188445696
1233546926299041792
1233546571565826048
1233542617473994752
1233542502550003712
1233542397080035328
1233540899361230848
1233539243865231360
1233539093876924416
1233538606683348992
1233537939126312960
1233536917532221440
1233536899081539584
1233536793770938368
1233534900411695104
1233534395702747136
1233533176317960192
1233532549617651712
1233532163129253888
1233530800282521600
1233530669894119424
1233529534395211776
1233529372876910592
1233528799926652928
1233528034638127104
1233526924661665792
1233525665217077248
1233523914866905088
1233523841693048832
1233523571395375104
1233523037150076928
1233522895919468544
1233522833776664576
1233522381018320896
1233522026444443648
1233521696667250688
1233519749029486592
1233516934437756928
1233516789205786624
1233514959411302400
1233514776204075008
1233514714467946496
1233514567122247680
1233514322137145344
1233512200658010112
1233508926420766720
1233508820506288128
1233508618953281536
1233508481979822080
1233507563980935168
1233506944574464000
1233506716991524864
1233506105835347968
1233505906593161216
1233505417092829184
1233505056172978176
1233504522603057152
1233504361449476096
1233503255310848000
1233501588859314176
1233499874240405504
1233499683424808960
1233499533021261824
1233499142342746112
1233498932191227904
1233497881547608064
1233497623585263616
1233497289932656640
1233497102472187904
1233496234800959488
1233493937572241408
1233493357944623104
1233492434568568832
1233492288145367040
1233492133920813056
1233492066556153856
1233491567228440576
1233491514682232832
1233491090034044928
1233490321968902144
1233489548845383680
1233489311456120832
1233488577100763136
1233487418327740416
1233487032275439616
1233486683850539008
1233486465377677312
1233486211337027584
1233486115539181568
1233485774080880640
1233485424330407936
1233484629212004352
1233484620144005120
1233484620102017024
1233484515596754944
1233484279050637312
1233484016474611712
1233483828762697728
1233483797401915392
1233483091395653632
1233483032948084736
1233483016741294080
1233482002625695744
1233481851857244160
1233480237217931264
1233479668193546240
1233479386105622528
1233478224245600256
1233477505719439360
1233476014271029248
1233474952738701312
1233474842135080960
1233474823290007552
1233474453092360192
1233472810988777472
1233472797961326592
1233472315045838848
1233470572199337984
1233470494806093824
1233470442855452672
1233470281215348736
1233469649221824512
1233468588167704576
1233468434748510208
1233468355883028480
1233467928638562304
1233467687243788288
1233467316815433728
1233467031565033472
1233466854926159872
1233466851834744832
1233466836613783552
1233466643356872704
1233466618421772288
1233466160806596608
1233466034209906688
1233465941624807424
1233465641224540160
1233465392527499264
1233465257663827968
1233464766733127680
1233464406908063744
1233463520953536512
1233463259895824384
1233463157953310720
1233463125120372736
1233463124683935744
1233462917779116032
1233462882362384384
1233462738933964800
1233462254676447232
1233462040980860928
1233461924878331904
1233461899121045504
1233461720301084672
1233461676093124608
1233461670204366848
1233461225721417728
1233461012273168384
1233460608378470400
1233459931833085952
1233459881199489024
1233459401928986624
1233459367564972032
1233458479333023744
1233458417500672000
1233458227326652416
1233456976698331136
1233456898034323456
1233456760637272064
1233456720434864128
1233455630922473472
1233455576555950080
1233455308929892352
1233455105065791488
1233455077085630464
1233454883753336832
1233454472023511040
1233454384648015872
1233454262253912064
1233454106003623936
1233453869616762880
1233453838927044608
1233453407102545920
1233452567360872448
1233452219170725888
1233451265167896576
1233451145403781120
1233450583140507648
1233449995975692288
1233449450414235648
1233449265470541824
1233449039905030144
1233449005553737728
1233448582335926272
1233448432074969088
1233447773585825792
1233447664680718336
1233447656887730176
1233447159229558784
1233447130288807936
1233446931407478784
1233446420050595840
1233446413591285760
1233445929618898944
1233445911625334784
1233445648554266624
1233444523168034816
1233444170569789440
1233443835646218240
1233443464634884096
1233442409142476800
1233442205525778432
1233441829003186176
1233441820270563328
1233441021092077568
1233440659098521600
1233440475576766464
1233440037422993408
1233439929876860928
1233439697654947840
1233439526095347712
1233438814024216576
1233438482703495168
1233438322703446016
1233437940501622784
1233437852966453248
1233437475210747904
1233437339851997184
1233437037841321984
1233436924246925312
1233436889803345920
1233436616892600320
1233436586144149504
1233436584101302272
1233436467168497664
1233436126028763136
1233435455221354496
1233434764872384512
1233434696769343488
1233434464853921792
1233434331462369280
1233434293806026752
1233434144870408192
1233433903026696192
1233433845816578048
1233433333650149376
1233432965310566400
1233432961887936512
1233432807059230720
1233432685974085632
1233432629485199360
1233432561210150912
1233432414149652480
1233432209341677568
1233432006568153088
1233431398343680000
1233430998853001216
1233430287444566016
1233430241730846720
1233430225838649344
1233430090467377152
1233429998050140160
1233429806357893120
1233429786648891392
1233429602934165504
1233429598018383872
1233429479072112640
1233429451708542976
1233429229154586624
1233429193062584320
1233429150817538048
1233429108157304832
1233429028184428544
1233428709463527424
1233428384031617024
1233428299709321216
1233428222269968384
1233428029466169344
1233427631279943680
1233427622065037312
1233427403545948160
1233427208456286208
1233426415111958528
1233426163390873600
1233426032562143232
1233425687945498624
1233425388124110848
1233425376015081472
1233425326807621632
1233424980018221056
1233424280974692352
1233424136317304832
1233424099675795456
1233423895908278272
1233423717180608512
1233423708267536384
1233423659395698688
1233423456206753792
1233423300522582016
1233423095022706688
1233422215229530112
1233421772902588416
1233420903024939008
1233419445307084800
1233418612821590016
1233418404775825408
1233418280850853888
1233417826377125888
1233417764876013568
1233417696739577856
1233417626107482112
1233417134962855936
1233417106747576320
1233417102566076416
1233416437777170432
1233416019496009728
1233415867523911680
1233415571598790656
1233415443030958080
1233415416548089856
1233414996714909696
1233414961705168896
1233414767223558144
1233414708578979840
1233414669936795648
1233414187570868224
1233414006091788288
1233413721055223808
1233413648040833024
1233413623764135936
1233412254198005760
1233412209553944576
1233412186719916032
1233412172727947264
1233412069216653312
1233412032772349952
1233411992737718272
1233411882570125312
1233411872772251648
1233411824491679744
1233411749535256576
1233411714177228800
1233411630253342720
1233411623500558336
1233411170096369664
1233411044388855808
1233410943205433344
1233410488882601984
1233409719177490432
1233409664517169152
1233409493494620160
1233409354419855360
1233409152996839424
1233408532348887040
1233408011764289536
1233407884442075136
1233407650362253312
1233407645614141440
1233407119086542848
1233406905588035584
1233406751938162688
1233406646493306880
1233406361184108544
1233406309531295744
1233406181290467328
1233405983264837632
1233405851550904320
1233405840780070912
1233405726942531584
1233405637096280064
1233405536542040064
1233405283747102720
1233404949805109248
1233404810373869568
1233404561727139840
1233404298496749568
1233403950570835968
1233403876142964736
1233403797923336192
1233403441126526976
1233402915404029952
1233401977066971136
1233401660963262464
1233401614024790016
1233401486203392000
1233401251590791168
1233401216715165696
1233401140525531136
1233401036544630784
1233401007255773184
1233400668486094848
1233400661431156736
1233400452739485696
1233400417788334080
1233400139961831424
1233399731075928064
1233399543405961216
1233399512036782080
1233399329236430848
1233399276123848704
1233399067289554944
1233399064022126592
1233398998326640640
1233398560844058624
1233398453285380096
1233398304001548288
1233398285555163136
1233398175366569984
1233398089089716224
1233397960379174912
1233397844901580800
1233397823619706880
1233397768284229632
1233397701653540864
1233397689922002944
1233397470266155008
1233396855612100608
1233396555329261568
1233396270028525568
1233396052314603520
1233396027773915136
1233395556086620160
1233395174966992896
1233395061234262016
1233395058034053120
1233395043525971968
1233394877997682688
1233394762696339456
1233394690206158848
1233394565568225280
1233394151380725760
1233394061827919872
1233393936355463168
1233393857506791424
1233393442484604928
1233392829545799680
1233392441664974848
1233392426364162048
1233392190367371264
1233392136017653760
1233391974826287104
1233391947773026304
1233391858501521408
1233391667790655488
1233391407462674432
1233391402953986048
1233391342014881792
1233391065803247616
1233390931858120704
1233390164631666688
1233389959513591808
1233389828844204032
1233389677698322432
1233389594999169024
1233389335388545024
1233389293110005760
1233388885700333568
1233388566736199680
1233388361303363584
1233388337110622208
1233388239567937536
1233387304280055808
1233387263326924800
1233386681803431936
1233386653328322560
1233386509069275136
1233386439989170176
1233386350025543680
1233386301375815680
1233386241565040640
1233385715465162752
1233385230301569024
1233385110923337728
1233384667878916096
1233384622769176576
1233384383198810112
1233384165791367168
1233383482379780096
1233383248769802240
1233383119316668416
1233383102392741888
1233382607150149632
1233382449440157696
1233382437650124800
1233382381299654656
1233382091414478848
1233382084829470720
1233381860044136448
1233381859784118272
1233381735716573184
1233381689197461504
1233381639650267136
1233381468417687552
1233381303447367680
1233381212313522176
1233381154805428224
1233380724239151104
1233380252774215680
1233380151888621568
1233379997303427072
1233379202147110912
1233379070928355328
1233379063642886144
1233378872357531648
1233378813708505088
1233378489874747392
1233378049170821120
1233377684820025344
1233377589202259968
1233377289146191872
1233376877173256192
1233376660319285248
1233376516060434432
1233376384589926400
1233375772196442112
1233375462581309440
1233375211816443904
1233374681190846464
1233374345541693440
1233374092855775232
1233373724218404864
1233373555615838208
1233372644084461568
1233372168492212224
1233372158648365056
1233371032410566656
1233370231508275200
1233369394799095808
1233369287143886848
1233368706014597120
1233367766461059072
1233367011440226304
1233366681596178432
1233365973463334912
1233365748430594048
1233365711877222400
1233365477654716416
1233365287954788352
1233365229674721280
1233364553985150976
1233364455892889600
1233364229761196032
1233363751019016192
1233363720002297856
1233363200932032512
1233363127582023680
1233362963458908160
1233362660143566848
1233362599128862720
1233362308392460288
1233361805189083136
1233361521658531840
1233361503950196736
1233361395762311168
1233361296822820864
1233360755694673920
1233360721964081152
1233360284204621824
1233359944801542144
1233359707412164608
1233359671576186880
1233358982363992064
1233358778361401344
1233358173765062656
1233357445596155904
1233357439560339456
1233356279193784320
1233356056111112192
1233355240235315200
1233355158748188672
1233355031933571072
1233354804073725952
1233354674662559744
1233354432013832192
1233354306549669888
1233354263918714880
1233354185166479360
1233353964093132800
1233353782924324864
1233353771926933504
1233353653253177344
1233353621112180736
1233353555676991488
1233353553281978368
1233353119586639872
1233352171984306176
1233352030686593024
1233351920439496704
1233350658494885888
1233350649204527104
1233350039336030208
1233347901218336768
1233347682007162880
1233347396547026944
1233347127016873984
1233347125653757952
1233346827367387136
1233346109512220672
1233346105351401472
1233346105091461120
1233346057930760192
1233345484309188608
1233345203643260928
1233344726041915392
1233344721499643904
1233344609452986368
1233344170733031424
1233343709246304256
1233343445978271744
1233343043840942080
1233342723375022080
1233342328917635072
1233341745443876864
1233341070416596992
1233340397298102272
1233339326425157632
1233339140072189952
1233338807933640704
1233338577620230144
1233338569554567168
1233338553846751232
1233338334170288128
1233338311088930816
1233337250110291968
1233337096984780800
1233336854252052480
1233336780310614016
1233336751466385408
1233336639428157440
1233336637427527680
1233336151693504512
1233335735043940352
1233335705549647872
1233335480210644992
1233335418231279616
1233335291878002688
1233334024141037568
1233333694930264064
1233333325852553216
1233332965918302208
1233332407106801664
1233331975387336704
1233331782357069824
1233331777881677824
1233330920817602560
1233330822020816896
1233330391567732736
1233329975358521344
1233329322041184256
1233329242433150976
1233328350334201856
1233328264162291712
1233328198630416384
1233327740331462656
1233326906025574400
1233326087033249792
1233325640646111232
1233324946677432320
1233324509484257280
1233324209310511104
1233324180080353280
1233324039525015552
1233323661328896000
1233323611219484672
1233323496933134336
1233322668868415488
1233322274624823296
1233321829525147648
1233321365719207936
1233321242402443264
1233320340052480000
1233316720955269120
1233315905662148608
1233315019137396736
1233314398376267776
1233314026332938240
1233314026303574016
1233311782581743616
1233311646321389568
1233308408771731456
1233307274673827840
1233306626163171328
1233306277339652096
1233305221348020224
1233304816086069248
1233303346049699840
1233303037839626240
1233302109359046656
1233301560295219200
1233301483652861952
1233301369081204736
1233300844386410496
1233300811091972096
1233300706863525888
1233300355947126784
1233298849105694720
1233297561781276672
1233296389133815808
1233295612646313984
1233295371067150336
1233294738242985984
1233294600774836224
1233294501839400960
1233292858813288448
1233292693872291840
1233292672737128448
1233291541936066560
1233290859740827648
1233290659475476480
1233289665727418368
1233288499002060800
1233286773431603200
1233286650836504576
1233285654471172096
1233284972494172160
1233282376039587840
1233282249082060800
1233281962690760704
1233281543193464832
1233281230600273920
1233280175623802880
1233278007818752000
1233276915861118976
1233275782891331584
1233275017430994944
1233274877383192576
1233274294852976640
1233274022495911936
1233272237270147072
1233272195649945600
1233270643514388480
1233270605748809728
1233255092851097600
1233252219706859520
1233250339505295360
1233250260887199744
1233250145296359424
1233249811274633216
1233249395434500096
1233244046979522560
1233242538716225536
1233242491341676544
1233241427989213184
1233238506727624704
1233236677994270720
1233236673888215040
1233234037411471360
1233233765201252352
1233232885815160832
1233232685104951296
1233229699519852544
1233229480690421760
1233228842392637440
1233225279520301056
1233224757748916224
1233219634133757952
1233217680246575104
1233214499265662976
1233213640179884032
1233210366693343232
1233208839341654016
1233207408366956544
1233206936562061312
1233206229545123840
1233205728359223296
1233202671697313792
1233201757024636928
1233201636232826880
1233200859577647104
1233198271348211712
1233194883520688128
1233193736542146560
1233192935627190272
1233192635361349632
1233191808655450112
1233191710278074368
1233191189249003520
1233190274978811904
1233190183459311616
1233187833843716096
1233187410122436608
1233185558077161472
1233184972250288128
1233183925649862656
1233183401919700992
1233182541672304640
1233182101819686912
1233182069607538688
1233182036925407232
1233182027836313600
1233180659612409856
1233180079682813952
1233180011080769536
1233179663779889152
1233177859608469504
1233176495675314176
1233176078144790528
1233175497028206592
1233174819262218240
1233174244340703232
1233174082528694272
1233173628021362688
1233173485066715136
1233171335553146880
1233170459484545024
1233170244358852608
1233169581012742144
1233168722963107840
1233168664964345856
1233168435594448896
1233168403839553536
1233168297815920640
1233167977203171328
1233167943711641600
1233167802686672896
1233167356085571584
1233166843029770240
1233166578491023360
1233166443375661056
1233165930374582272
1233165264130379776
1233164796704378880
1233164637996273664
1233164518739578880
1233164184797364224
1233163915397173248
1233163767921467392
1233163283043102720
1233163182581174272
1233162914728681472
1233162856461471744
1233162832843362304
1233162300594511872
1233161857772478464
1233161768643571712
1233161521212973056
1233161506033893376
1233161256753758208
1233161077023805440
1233160642191818752
1233160490236489728
1233160435425107968
1233160119166222336
1233159969786212352
1233159763426410496
1233159640239620096
1233158942022348800
1233158031971639296
1233157548771102720
1233155427115859968
1233155155648040960
1233154121299058688
1233154106237149184
1233152793231470592
1233152023631204352
1233150962593927168
1233150072533155840
1233149952605347840
1233149827665367040
1233149780177674240
1233148422821163008
1233147016051429376
1233146170689695744
1233146035293175808
1233145416235077632
1233144567244972032
1233143982592602112
1233143530429853696
1233142881185148928
1233140570035511296
1233140479056908288
1233140253348810752
1233139982237413376
1233138678098255872
1233138556681388032
1233137136691556352
1233136982253019136
1233134946803339264
1233133919144488960
1233131922743857152
1233131712558878720
1233131326204731392
1233130567413194752
1233130263284211712
1233129700035375104
1233129391854501888
1233127556846477312
1233127311299555328
1233126908772208640
1233126640135307264
1233125366249607168
1233124060562968576
1233123178479747072
1233123132606681088
1233123007331274752
1233122971792945152
1233122207813054464
1233120501792415744
1233119630820102144
1233116885648015360
1233116499579199488
1233116242472570880
1233113089148456960
1233112865491554304
1233112451459112960
1233112091738796032
1233110860136173568
1233109041573920768
1233108286699790336
1233106350625787904
1233105927307440128
1233104601391489024
1233104209752592384
1233103769950285824
1233102415257165824
1233101180227555328
1233100485223047168
1233100035266576384
1233097985694658560
1233097854324854784
1233097176378683392
1233096192768331776
1233095884671463424
1233093471554195456
1233093462712406016
1233093438909878272
1233092726679318528
1233091872672886784
1233091524793176064
1233091169678217216
1233089450391097344
1233089410939473920
1233088449210548224
1233088082842353664
1233088038219272192
1233086963147735040
1233086903559299072
1233084486763589632
1233082430753562624
1233082399031996416
1233080575935860736
1233078927318491136
1233078915641544704
1233077855338291200
1233077351191179264
1233077090456670208
1233076739963834368
1233076593532129280
1233075341855526912
1233074934747979776
1233074886307917824
1233073685910761472
1233073658421055488
1233072127881834496
1233072055706365952
1233071930892095488
1233070691869552640
1233070537934422016
1233070416702459904
1233070315783278592
1233069914963030016
1233069310156951552
1233068407244779520
1233068125026910208
1233067992344383488
1233067599900151808
1233067053873057792
1233066778147934208
1233066763056709632
1233066397636399104
1233065425522614272
1233065405553340416
1233062483214184448
1233062433507467264
1233062383448395776
1233061561452957696
1233061300793511936
1233061296473550848
1233061190710046720
1233060890821312512
1233056996330356736
1233056679031296000
1233056053505515520
1233056000963469312
1233055317065375744
1233054552481464320
1233053345742512128
1233052817004171264
1233052652189241344
1233050418436956160
1233049228647239680
1233048159363960832
1233047187313041408
1233046641596227584
1233046432808144896
1233045668039659520
1233044747448659968
1233044167410044928
1233042679224848384
1233042364223983616
1233041513191477248
1233040393534615552
1233039742863912960
1233039677361397760
1233039343801061376
1233038381350780928
1233037260351823872
1233037047423586304
1233036712047235072
1233034739642249216
1233033673089396736
1233032479872864256
1233031794372554752
1233031498690899968
1233030753627365376
1233030169306292224
1233029350058024960
1233029328620937216
1233029320894971904
1233028701799034880
1233028347325755392
1233028004118507520
1233027756067303424
1233027223856320512
1233025846153183232
1233025717308416000
1233025239707242496
1233025150691483648
1233024674256343040
1233023846778908672
1233023330116145152
1233023209949351936
1233022734730485760
1233022544271282176
1233020089257152512
1233019458299535360
1233019260118749184
1233019236538363904
1233018562454921216
1233017843798728704
1233017100727443456
1233016089828896768
1233015196005928960
1233015002963030016
1233014970700484608
1233013975979380736
1233013585502179328
1233013237823758336
1233011412802256896
1233011286067359744
1233009515718676480
1233009400916262912
1233008606091661312
1233006550035374080
1233005419649536000
1233004632412184576
1233003848626774016
1233001882748162048
1233001247927623680
1233001022143922176
1233000724864389120
1232999425020063744
1232999212088004608
1232998501442670592
1232997811072925696
1232997111412584448
1232995877419130880
1232994896270757888
1232993802580832256
1232993782146138112
1232993635676950528
1232993166787305472
1232991868188684288
1232991770331492352
1232991087196803072
1232989532900904960
1232989234329522176
1232989145582182400
1232987879233720320
1232987751248609280
1232986567326814208
1232986385143017472
1232985547725066240
1232985490103529472
1232985425435930624
1232984746701000704
1232984629407289344
1232984494648549376
1232982475481210880
1232982248355442688
1232981967882407936
1232980949790527488
1232980938159771648
1232980896392908800
1232980834577076224
1232980833918570496
1232978781889056768
1232978249711521792
1232977948417970176
1232976821295165440
1232972888887697408
1232972570007240704
1232971858347249664
1232971313641291776
1232970943397613568
1232970664807731200
1232969220876533760
1232969005930930176
1232967337793466368
1232966565391405056
1232966310595846144
1232965258844786688
1232964625232252928
1232964131919147008
1232963641672163328
1232963203371618304
1232963100229488640
1232963060127670272
1232962836499877888
1232962076240490496
1232961050871574528
1232959947517743104
1232959191540752384
1232958691738931200
1232958487870701568
1232958429377024000
1232958411198943232
1232957808125063168
1232957407745101824
1232956550634971136
1232956038258855936
1232955953953198080
1232955509331853312
1232954960737951744
1232953897028849664
1232953746876964864
1232953673040498688
1232953315937411072
1232953237390741504
1232952138659246080
1232951013251985408
1232950295119921152
1232949883109289984
1232949742025396224
1232948388682842112
1232947957647003648
1232947835294928896
1232947497196191744
1232947486106542080
1232946310380126208
1232946304172675072
1232946300620038144
1232945956162809856
1232945230808338432
1232944612622372864
1232944598852554752
1232942464870338560
1232942275958837248
1232942012883709952
1232941309834485760
1232940747583901696
1232939885847285760
1232939453188132864
1232939411156979712
1232939356538753024
1232939323969896448
1232939286837780480
1232939251265933312
1232939050463645696
1232938781264797696
1232938239951900672
1232935275489304576
1232934709514178560
1232934497693446144
1232934462650015744
1232934046398910464
1232932092541050880
1232931203214462976
1232930894836453376
1232930113915719680
1232929643931422720
1232929411944480768
1232928666801377280
1232928384717639680
1232928249296171008
1232926487961112576
1232926144724439040
1232924601421717504
1232924213348093952
1232923378853588992
1232921346113515520
1232920505839079424
1232919928392515584
1232918888138055680
1232917807840550912
1232916792718381056
1232911706759651328
1232911650509877248
1232910850647830528
1232910035623112704
1232909499289210880
1232908721677729792
1232907941319204864
1232906820177416192
1232906621132693504
1232905530747703296
1232905379736145920
1232905219828109312
1232904431999410176
1232903362938654720
1232902057394348032
1232901292160319488
1232899178264592384
1232898446857658368
1232898090862071808
1232896907317563392
1232895544063860736
1232892973442052096
1232891556258107392
1232891475874263040
1232891024860753920
1232887684261011456
1232884978570203136
1232884976217133056
1232883028138979328
1232881858960121856
1232881733172744192
1232878020190334976
1232877975051259904
1232874420135514112
1232874182779777024
1232872260601622528
1232870991820443648
1232866337501798400
1232865957900640256
1232863171586584576
1232861142852214784
1232859844576718848
1232859838767620096
1232858098026471424
1232857668659769344
1232855370546024448
1232855240069799936
1232853604463259648
1232852721516109824
1232851734134972416
1232851076543655936
1232851046940041216
1232850762725756928
1232850595939139584
1232848886500212736
1232848562137989120
1232848309686915072
1232845493195169792
1232844434359767040
1232841746310021120
1232835352777326592
1232834516760367104
1232833574832730112
1232831215415283712
1232830542158032896
1232830248699547648
1232828108392345600
1232828042071797760
1232825523514040320
1232825149495238656
1232824894024339456
1232822143433367552
1232821473724620800
1232821009725698048
1232820696763523072
1232819308822192128
1232818772785778688
1232817762424119296
1232817689946705920
1232817555045138432
1232816768877498368
1232816692339728384
1232816489196949504
1232816082836246528
1232815646620241920
1232815520858038272
1232815104820948992
1232814928416866304
1232814794245275648
1232814739446583296
1232814566507261952
1232813810098020352
1232813679239761920
1232813149935398912
1232812487914991616
1232810958424354816
1232810072943685632
1232809935009767424
1232809458155130880
1232808739444416512
1232808605902086144
1232808137935216640
1232807555002503168
1232806399869997056
1232806296660742144
1232805738222891008
1232804740477702144
1232804485002559488
1232802876570963968
1232802347509743616
1232801841538310144
1232801149155074048
1232801117714735104
1232800409699409920
1232799170873974784
1232799115320295424
1232798629200400384
1232798249981038592
1232798127192756224
1232797624509464576
1232797249631137792
1232796775825592320
1232796749653213184
1232796498951172096
1232796035782717440
1232796034507689984
1232795223878664192
1232795063199113216
1232795026209460224
1232794818469863424
1232794811620421632
1232793947254202368
1232793488904904704
1232793141633310720
1232793129629163520
1232792948410023936
1232792798799310848
1232791967202979840
1232791544815636480
1232791117629816832
1232788928635293696
1232788153678880768
1232787674139942912
1232787265686056960
1232787251601408000
1232786672426856448
1232786463416344576
1232785580532097024
1232785157330882560
1232784834361204736
1232782307179794432
1232781281995481088
1232780767098474496
1232779218741846016
1232778921386692608
1232778787013758976
1232778764746096640
1232778432578113536
1232778374440988672
1232778346322247680
1232778345890418688
1232776934309842944
1232776626921803776
1232776148314132480
1232776120120070144
1232775863663394816
1232775701226491904
1232775683564285952
1232775631617875968
1232774350509629440
1232773648169259008
1232773582146691072
1232772887888699392
1232772124529610752
1232772021563645952
1232770467620098048
1232769164995112960
1232768922874609664
1232768725838974976
1232768631932456960
1232768548348416000
1232767858859499520
1232767586724544512
1232766836627791872
1232766800070397952
1232766590967517184
1232766213882810368
1232764933336653824
1232763701108912128
1232762615367114752
1232762596425596928
1232762192950431744
1232762056585162752
1232761788598571008
1232760849778999296
1232760649308135424
1232760272084848640
1232759972926091264
1232759949106827264
1232759770169446400
1232759739911561216
1232759349283520512
1232759324482686976
1232759222275911680
1232759154294611968
1232758911452811264
1232758877005000704
1232758851159629824
1232758372673490944
1232758071191048192
1232758044997619712
1232757366828883968
1232757178357952512
1232754888276398080
1232754786170216448
1232754275895402496
1232754011511623680
1232753460367577088
1232753332843839488
1232753142120505344
1232752613965357056
1232752231050551296
1232751266448781312
1232750975208873984
1232750649684697088
1232750604679892992
1232750478854885376
1232750248361111552
1232749881271496704
1232749728556834816
1232749580531511296
1232749210509901824
1232748674557644800
1232747976575066112
1232747950738231296
1232747938134269952
1232747304655806464
1232746982390759424
1232746733265915904
1232745676154511360
1232745421367316480
1232744907795767296
1232744714929135616
1232744395323015168
1232744355573661696
1232744253501181952
1232744003738750976
1232743986479144960
1232743328476692480
1232742793056964608
1232742773377392640
1232742677063532544
1232742649611706368
1232742579780935680
1232742535115624448
1232742288343937024
1232742125147541504
1232741596489228288
1232740920518377472
1232740679559917568
1232740501356302336
1232740072266641408
1232740066293899264
1232739611060973568
1232739587593789440
1232738967176564736
1232738409728229376
1232738408872714240
1232738390103265280
1232738349217173504
1232737644913627136
1232737611590119424
1232737610012987392
1232737189689204736
1232737090921611264
1232736966938169344
1232736678562947072
1232736135761317888
1232736006350213120
1232735928638156800
1232735680599642112
1232735348871946240
1232735030084018176
1232734965038628864
1232734951528914944
1232734893421060096
1232734595612860416
1232734056665710592
1232733590384869376
1232733252852555776
1232732822395207680
1232732296672874496
1232731950747615232
1232731853506908160
1232731321669181440
1232730538492006400
1232729983182950400
1232729649249243136
1232729452670418944
1232729382042599424
1232729174776991744
1232728787562962944
1232728628976345088
1232728017425793024
1232727893102485504
1232727788181954560
1232727475467231232
1232727199352004608
1232726053094817792
1232725993200246784
1232725045748928512
1232724027019612160
1232723932412809216
1232723700862070784
1232723635326066688
1232722138890559488
1232722127716929536
1232721753039921152
1232721488035373056
1232721388231897088
1232719388576493568
1232719363469463552
1232718852431269888
1232718772751912960
1232718454123307008
1232717783185657856
1232717206028529664
1232716824019689472
1232716791501250560
1232715983443415040
1232715744296783872
1232713936493039616
1232713481163608064
1232713217794809856
1232712605044793344
1232712583251140608
1232712246255607808
1232712134427054080
1232711729316073472
1232711344853573632
1232711319595503616
1232710904418054144
1232710631821803520
1232710456680361984
1232709967435702272
1232709957851766784
1232709438672375808
1232709408393551872
1232708657890111488
1232707195739025408
1232705633566236672
1232704465268023296
1232704229170647040
1232704177802969088
1232704144714162176
1232703861007187968
1232703634594574336
1232703522703060992
1232703254175182848
1232702843666280448
1232702259135275008
1232701431834140672
1232701079864741888
1232701060021727232
1232700499025154048
1232699229660778496
1232699174036103168
1232698893755912192
1232698571230760960
1232698227289284608
1232698223728320512
1232698173342306304
1232698156967714816
1232698047194435584
1232697913597296640
1232697542049226752
1232697399891513344
1232697345990709248
1232697061558149120
1232697016289021952
1232696848521027584
1232696590055297024
1232696324266610688
1232696163658321920
1232695404778708992
1232695361606750208
1232694881002414080
1232694740799324160
1232694704787120128
1232694609186369536
1232694173779812352
1232694157833056256
1232693133684740096
1232692800992534528
1232692382572908544
1232692039176814592
1232691826663968768
1232691797593378816
1232691749098840064
1232691675744567296
1232691316846448640
1232691176492457984
1232691150122868736
1232691037451227136
1232691031335940096
1232690480670007296
1232690240961368064
1232690069087117312
1232689811095506944
1232689733064630272
1232689618052579328
1232689368403410944
1232688864575283200
1232688309786288128
1232688210393935872
1232688050897113088
1232688006454239232
1232687952658038784
1232687904968802304
1232687813520510976
1232687490227675136
1232687166721007616
1232687057811771392
1232686981764743168
1232686858347347968
1232686649479454720
1232686342162800640
1232686217294118912
1232686215150915584
1232685832588398592
1232685818701021184
1232685814074748928
1232685645161738240
1232685503490789376
1232685375098884096
1232685286544617472
1232685047909638144
1232684692647927808
1232684689669922816
1232684538775646208
1232684346777182208
1232683923827806208
1232683907499216896
1232683713428938752
1232683651235749888
1232683344426602496
1232683324877017088
1232683154642632704
1232683122363392000
1232683035222585344
1232682838824226816
1232682500956266496
1232682498494259200
1232682400905228288
1232682227634462720
1232682029357117440
1232681809424666624
1232681735286140928
1232681725861351424
1232681201179164672
1232681131742580736
1232681015254114304
1232680782566764544
1232680448263938048
1232680355238273024
1232680291380158464
1232680054339121152
1232679997262856192
1232679982780076032
1232679905998979072
1232679858611900416
1232679839016071168
1232679731872571392
1232679490934976512
1232679262165008384
1232679156862930944
1232678604984610816
1232678526844915712
1232678437720072192
1232678405566582784
1232678353842442240
1232678341167239168
1232678207230554112
1232678199026475008
1232678130134941696
1232677815880863744
1232677664001024000
1232677648645705728
1232677528327901184
1232677428797067264
1232677406948896768
1232677353739997184
1232677264057196544
1232677257971458048
1232677257472282624
1232677124642951168
1232677043210465280
1232676936675143680
1232676920925487104
1232676838339682304
1232676835332411392
1232676725856907264
1232676586438025216
1232676555383623680
1232676520038146048
1232676348847673344
1232675477174788096
1232675303018967040
1232675273021280256
1232675205228531712
1232675196387123200
1232674201271750656
1232674176080547840
1232674042022440960
1232673989652291584
1232673767345860608
1232673091710484480
1232672917894225920
1232671299274772480
1232670399168684032
1232670374250393600
1232669450689597440
1232668176040779776
1232667720837189632
1232666700027486208
1232666531479375872
1232666207309815808
1232664273706418176
1232664131720728576
1232663541347426304
1232662726108962816
1232662575340539904
1232661593311215616
1232660844888121344
1232659620029706240
1232659335009984512
1232659315506503680
1232659076695437312
1232658620929712128
1232658314829402112
1232658147715629056
1232657868874276864
1232657818332696576
1232657758475948032
1232657125429665792
1232657084531007488
1232656764409171968
1232655146271870976
1232653903809961984
1232653716580425728
1232653590369619968
1232652851559718912
1232652330509705216
1232651899154903040
1232651530010005504
1232650497858949120
1232650151644352512
1232649674651291648
1232649010382401536
1232648128597241856
1232647939870404608
1232646922415964160
1232646082775199744
1232646030455267328
1232645490409443328
1232645140419772416
1232644516408111104
1232644501841293312
1232643977490255872
1232643860729196544
1232642304395153408
1232641909790609408
1232641544080908288
1232641348391428096
1232640543051722752
1232639967505113088
1232639939176804352
1232639740010209280
1232639717956411392
1232639337717612544
1232639236488224768
1232638893851209728
1232637827642359808
1232636942132473856
1232636679208546304
1232635331335331840
1232634145487998976
1232632662264893440
1232631728478597120
1232631708702400512
1232631660635516928
1232631312181317632
1232631192895283200
1232630909087567872
1232630795711500288
1232630073750179840
1232629150135001088
1232628709913268224
1232628675805188096
1232626987543470080
1232626702578311168
1232625102858182656
1232624588573552640
1232624340534841344
1232624012288757760
1232623875554410496
1232623486331424768
1232623138581762048
1232622606416662528
1232622527714922496
1232622484303884288
1232622314002403328
1232622105516134400
1232621805019398144
1232621502572453888
1232620977420259328
1232620710729678848
1232620339860996096
1232615951969005568
1232615568244494336
1232615564259889152
1232615552931155968
1232615439873839104
1232614673486405632
1232614198791811072
1232614153837150208
1232613807454871552
1232613779197874176
1232613736671666176
1232613124190212096
1232612153477259264
1232611613498380288
1232611314691911680
1232611107178795008
1232611094838951936
1232609472985481216
1232609342106587136
1232608778920570880
1232608198336696320
1232608028517634048
1232607021863706624
1232606233443565568
1232606232420196352
1232605457396617216
1232604031622799360
1232603848398663680
1232603597197774848
1232602990202310656
1232602508003926016
1232601589011111936
1232601162177818624
1232600560815280128
1232600402622853120
1232600310260142080
1232599313982918656
1232598803061989376
1232598494558511104
1232597161789005824
1232596162135199744
1232596146138296320
1232595217192300544
1232595162750054400
1232595055921201152
1232594989160398848
1232593918098903040
1232593904626618368
1232593737613824000
1232593705812602880
1232593282405765120
1232593176382316544
1232591661223596032
1232589385159278592
1232588987405160448
1232588722299904000
1232588709880565760
1232587864505847808
1232586451780587520
1232586284008259584
1232586165133418496
1232585430219939840
1232585133670178816
1232584028261359616
1232583975467544576
1232583526496833536
1232583431227355136
1232583229586231296
1232582359481896960
1232582064576303104
1232581948020752384
1232581073885855744
1232581056273870848
1232580983091675136
1232580783728136192
1232579942954622976
1232578093069500416
1232576144345423872
1232575274274848768
1232574722648551424
1232573632297263104
1232571992169205760
1232571946283524096
1232571851387363328
1232571752078827520
1232571571778269184
1232571150426750976
1232570384634929152
1232570192632393728
1232569727131607040
1232569721112813568
1232569614296637440
1232569576304476160
1232568068259401728
1232567820837425152
1232567670186201088
1232566589767245824
1232565829318742016
1232564540992303104
1232564213274619904
1232563597441740800
1232563318310592512
1232559936636432384
1232559623212634112
1232559450247970816
1232559316353159168
1232558199611514880
1232558019268894720
1232557016188624896
1232553858620100608
1232553396697104384
1232553380024745984
1232550993855905792
1232547857456128000
1232547708201623552
1232545283260612608
1232544813569970176
1232542853538156544
1232541940505202688
1232541263326568448
1232540011385352192
1232537857937563648
1232536782975066112
1232536551499808768
1232535528999968768
1232535236535128064
1232534729485955072
1232533092486832128
1232532947720450048
1232531750405976064
1232530820512067584
1232530804225564672
1232530087443959808
1232529725559492608
1232522603048226816
1232522028818685952
1232521544896696320
1232520311490277376
1232519458004045824
1232518154523308032
1232515906091114496
1232510598170148864
1232506217215512576
1232505957097148416
1232505144178286592
1232505078311006208
1232504486331023360
1232504230319214592
1232502953640153088
1232500628494131200
1232498984255553536
1232494545805332480
1232493715861561344
1232493010128003072
1232492730376306688
1232491726645760000
1232489243475243008
1232484669163102208
1232483743018807296
1232483343473631232
1232482915851759616
1232482345694810112
1232482116136361984
1232481615126781952
1232481211773157376
1232481064095870976
1232477178668830720
1232476372829863936
1232475631968907264
1232475557499043840
1232474596579799040
1232472234909847552
1232470573822828544
1232470364262764544
1232470333275271168
1232469838133485568
1232468925025116160
1232468222969958400
1232467898955747328
1232466741453701120
1232466322274963456
1232463681235013632
1232463370948734976
1232461302993276928
1232456911116652544
1232456022242947072
1232455932107460608
1232455583959154688
1232455187605807104
1232454990544785408
1232454814098812928
1232449118657601536
1232448315758825472
1232447683559714816
1232447165374459904
1232446009466183680
1232444556265705472
1232443932602032128
1232443799810347008
1232443005186928640
1232442417703346176
1232442232898064384
1232442090946060288
1232440134068514816
1232440070327554048
1232438475854532608
1232438164196745216
1232437645847879680
1232434948016967680
1232433157363752960
1232433061557456896
1232432743520194560
1232432113342828544
1232429820316934144
1232429756559155200
1232429519937527808
1232427687785857024
1232427279403192320
1232426806856290304
1232426633925054464
1232426609509990400
1232426098564194304
1232425574578245632
1232425296151924736
1232425034779648000
1232423045404536832
1232421990784520192
1232421908425035776
1232421178909872128
1232419292072816640
1232417676628152320
1232417396650016768
1232417102381768704
1232416237684023296
1232414101273530368
1232413314031861760
1232412680855515136
1232412171658833920
1232411690391597056
1232411277307383808
1232410838658498560
1232410453181071360
1232409042510848000
1232408814495793152
1232407535690240000
1232406864337436672
1232406653552619520
1232406319149154304
1232406169676894208
1232406163385241600
1232405739538391040
1232403867532435456
1232402908538232832
1232402277677203456
1232401886503997440
1232401737681522688
1232401112440954880
1232397855421276160
1232397830213390336
1232397749674369024
1232396997249896448
1232396737676898304
1232396408122155008
1232395210568675328
1232395068817973248
1232394919836299264
1232394859907928064
1232394629477273600
1232392736550027264
1232392609668059136
1232392097396711424
1232391341151334400
1232390808923279360
1232389828098035712
1232388181829595136
1232388053349675008
1232388022857064448
1232387977990615040
1232387685693693952
1232387498325823488
1232387428817633280
1232387286781890560
1232387284311429120
1232386595010932736
1232385451392196608
1232385272551075840
1232384212260589568
1232383510909988864
1232382692555153408
1232382185103134720
1232380504739139584
1232380084478103552
1232379923874095104
1232379739517657088
1232379025185759232
1232378384212250624
1232378297083998208
1232376656721043456
1232376002141151232
1232375993928540160
1232375961242521600
1232375898814504960
1232375258759475200
1232375112177004544
1232374703035179008
1232374588316803072
1232373081538207744
1232372724804325376
1232372242962665472
1232371685573218304
1232371296329138176
1232370318146015232
1232370091293057024
1232368299004043264
1232367708509032448
1232367452954210304
1232367371966459904
1232366488927055872
1232365913552424960
1232365428346933248
1232365405752176640
1232364712500830208
1232364642002964480
1232364638517579776
1232363925989015552
1232363895274082304
1232363211460096000
1232363049518014464
1232362255506976768
1232361872210288640
1232358988278370304
1232358118467809280
1232357862971715584
1232356126097846272
1232355011507752960
1232354321108475904
1232354144918417408
1232353583322013696
1232353230748897280
1232352950024130560
1232352605311033344
1232348963552010240
1232348052670693376
1232345860186558464
1232344753267728384
1232344407967297536
1232343321768603648
1232343044176871424
1232342729281220608
1232342243903668224
1232341988189622272
1232340520741019648
1232338464126963712
1232338011414765568
1232337523722027008
1232337457632309248
1232336770945232896
1232333132076113920
1232329527008940032
1232328705160175616
1232328284043497472
1232327850499305472
1232322375024168960
1232321278276722688
1232320530675425280
1232319824644263936
1232319337849028608
1232319102473113600
1232318459767222272
1232317741891084288
1232314915031015424
1232313610766082048
1232311823736721408
1232311395355480064
1232310157956304896
1232309802941984768
1232309707576168448
1232308884783673344
1232306040332603392
1232305268991700992
1232304248064368640
1232303006219198464
1232302206629662720
1232299205286297600
1232298523384631296
1232296839732314112
1232295682217738240
1232292364158427136
1232290570741129216
1232289989205073920
1232289416217055232
1232289312688963584
1232289277997797376
1232289183546388480
1232288620045885440
1232281631907434496
1232280728647299072
1232280231207165952
1232277012968017920
1232275689828737024
1232274601536884736
1232274397744025600
1232274202595643392
1232271522963673088
1232271354768035840
1232268223699193856
1232268085312225280
1232267264302473216
1232266653586612224
1232266193622446080
1232262241719922688
1232261979802341376
1232261841520332800
1232260531521757184
1232260381717991424
1232256400774004736
1232256249531494400
1232256102148059136
1232255811545530368
1232255667664302080
1232255439510753280
1232253301095387136
1232252755789611008
1232248746328698880
1232248015857111040
1232247050504409088
1232246767036649472
1232244466989268992
1232243995666939904
1232242612062519296
1232242034536255488
1232240531134205952
1232240198576148480
1232239450018594816
1232234275547820032
1232230729259589632
1232229204881805312
1232228744917471232
1232228378796687360
1232227695188041728
1232227482662772736
1232227435946663936
1232226909095944192
1232226689821872128
1232226032809369600
1232225695402799104
1232224666053419008
1232224387534856192
1232222787495956480
1232222030877077504
1232222025202184192
1232221543507341312
1232221471864426496
1232221208470384640
1232221192058265600
1232220749441708032
1232219258391859200
1232219239534276608
1232218297636139008
1232217488982671360
1232215755594309632
1232215741967020032
1232215286708830208
1232213749198737408
1232213642805993472
1232212592103346176
1232212540723257344
1232212031127871488
1232211709911355392
1232210215946326016
1232207268776730624
1232207079156273152
1232206735986659328
1232206620698054656
1232206091682869248
1232205773914042368
1232205041831993344
1232202682464534528
1232198951828381696
1232198930441523200
1232194799639433216
1232194515827646464
1232190936492511232
1232190832805105664
1232184216789475328
1232183945841672192
1232182193457221632
1232181147834232832
1232179789907165184
1232179720025862144
1232179675562115072
1232179391024726016
1232178737795325952
1232178653485817856
1232174521186045952
1232173893068058624
1232166343090163712
1232162324649136128
1232157018464538624
1232146290433306624
1232134396838338560
1232129827143995392
1232127961437880320
1232123685705846784
1232111231143530496
1232109222038560768
1232107990221819904
1232107038353702912
1232101945189556224
1232096606821986304
1232096203921248256
1232091826963800064
1232089644654891008
1232088430953291776
1232088193048154112
1232087142542794752
1232086199038287872
1232085978505891840
1232085325679333376
1232084846391984128
1232082812322271232
1232082809189044224
1232080317919440896
1232077921310978048
1232071703485919232
1232068324885819392
1232067030456492032
1232066856590233600
1232065550144028672
1232064735077642240
1232063727974916096
1232063061818609664
1232062404365881344
1232060706800984064
1232059033240195072
1232056936087969792
1232056495379972096
1232053701512220672
1232053109649793024
1232052386056884224
1232050883300556800
1232050057328963584
1232049973216321536
1232049885332926464
1232048562248155136
1232045918943424512
1232045206272434176
1232042957173329920
1232041389816340480
1232038385147092992
1232037696622780416
1232036267271106560
1232034544313884672
1232030574593753088
1232030342464376832
1232029036374872064
1232029032520257536
1232028728701706240
1232027678561230848
1232025548395831296
1232024898152943616
1232023811735855104
1232023312387203072
1232017252276371456
1232016064042749952
1232011140378419200
1232009357791047680
1232007923015901184
1232007710662516736
1232007683366178816
1232006411950780416
1232006023570960384
1232003894747619328
1232003529687982080
1232003139718373376
1232002349100650496
1231996047938985984
1231991675234418688
1231991162870747136
1231988464142422016
1231985754055815168
1231980416715960320
1231980363242778624
1231979708595740672
1231979347092762624
1231977850187735040
1231977082894372864
1231976058548817920
1231974566416846848
1231973199161618432
1231973075543056384
1231972688425574400
1231972369025130496
1231971879822352384
1231970493483319296
1231968865556541440
1231967558779179008
1231966764260560896
1231966549872787456
1231966250890399744
1231965757749284864
1231963401800355840
1231963274679328768
1231963122342268928
1231962115822493696
1231961861266006016
1231959340267003904
1231956261530406912
1231955163444842496
1231954794471800832
1231953638475665408
1231950845173993472
1231949763161075712
1231949662040580096
1231949281935986688
1231949170690293760
1231948782788472832
1231947999162531840
1231947188550406144
1231945915755352064
1231945547302481920
1231944067929395200
1231943748025749504
1231943574557777920
1231942491886084096
1231942333425487872
1231942243713351680
1231941394689875968
1231940700427751424
1231940256137646080
1231939947277488128
1231939701357121536
1231938908944027648
1231938337855983616
1231936576621404160
1231935479714582528
1231935082581184512
1231935050842886144
1231934631588569088
1231934527708155904
1231932912695697408
1231932903124279296
1231931236823830528
1231931232533000192
1231931007726751744
1231930532784721920
1231928684187193344
1231927254319587328
1231927174438977536
1231926992167153664
1231926306398359552
1231924753222553600
1231924753130278912
1231924618988048384
1231921160289386496
1231919538167590912
1231918949979303936
1231917966918324224
1231917717181075456
1231915929937874944
1231915617210568704
1231914736524156928
1231914196167729152
1231913321915387904
1231911903871418368
1231911711050956800
1231908975198777344
1231908422565523456
1231907817398980608
1231905351412391936
1231905225486807040
1231902174000680960
1231901634197950464
1231899555119161344
1231896565532459008
1231894911516983296
1231894069154021376
1231893477446696960
1231892435216801792
1231891618099290112
1231891467016249344
1231889640677875712
1231887985479684096
1231887386369458176
1231886592740077568
1231884756717129728
1231884529951838208
1231883950227906560
1231882983767822336
1231881817516584960
1231881274756927488
1231877884576456704
1231877437648060416
1231877432711319552
1231876432856436736
1231876041385312256
1231875110061121536
1231873980899958784
1231872427971362816
1231872424657874944
1231870528643719168
1231870526785609728
1231870356677369856
1231869354297479168
1231867609873698816
1231867494979096576
1231866780257267712
1231866640213725184
1231866621754372096
1231863002430935040
1231862886181613568
1231862494676819968
1231861906933194752
1231861067833380864
1231859418553344000
1231859110313771008
1231859040495513600
1231856130378338304
1231855934693093376
1231855900681474048
1231855729096654848
1231851505486946304
1231850971640107008
1231850470102138880
1231845841234644992
1231845488661540864
1231845265029713920
1231843747232698368
1231842887186272256
1231840511536791552
1231840076201525248
1231838644534571008
1231837150603169792
1231829370983112704
1231828050658177024
1231826275251048448
1231825701877305344
1231825311852978176
1231822577322074112
1231818540715515904
1231813919557054464
1231813623971889152
1231805989457997824
1231800928761716736
1231796910320685056
1231781370214543360
1231773847747039232
1231772622783946752
1231768234183008256
1231759509573402624
1231754758022713344
1231754360662544384
1231747855909519360
1231743200550965248
1231735874737459200
1231731950710403072
1231726833198075904
1231725156680138752
1231721908925689856
1231711148434710528
1231709988864823296
1231704756613263360
1231704730755354624
1231702548052094976
1231700513927901184
1231691018732363776
1231687494640508928
1231686651421659136
1231679906960101376
1231673844735365120
1231669547045937152
1231667435008225280
1231666044311203840
1231654443462152192
1231653599333244928
1231653295611088896
1231651200111697920
1231651188015108096
1231645663634415616
1231642222438866944
1231639941731508224
1231639159367860224
1231636220683243520
1231630596243443712
1231625827110051840
1231624982347702272
1231624909899608064
1231621045846589440
1231619985425883136
1231612219282149376
1231609423686230016
1231609211542495232
1231609184816422912
1231608188207816704
1231601616907669504
1231599604916867072
1231598686754525184
1231598031818063872
1231597737491255296
1231595940206825472
1231594713129586688
1231594307959873536
1231592382140964864
1231591904472682496
1231591365852700672
1231590418426421248
1231590271575445504
1231590168919851008
1231586060531978240
1231580176347254784
1231577237456973824
1231576849664413696
1231568661346951168
1231568436632879104
1231568282039144448
1231567947212128256
1231567490238631936
1231565705822126080
1231565154078294016
1231563163805593600
1231563018791608320
1231562098360147968
1231560758288363520
1231560139339108352
1231559855439261696
1231558460040515584
1231557568587276288
1231556947117252608
1231553063988744192
1231552326982389760
1231551549530345472
1231546896994447360
1231545749059579904
1231544175562194944
1231544068020342784
1231543832736608256
1231543574615003136
1231543235706748928
1231541379203059712
1231539649341992960
1231539341291327488
1231538372885336064
1231538276009496576
1231537626924093440
1231536453584183296
1231535325413085184
1231533930249146368
1231533919788396544
1231533354304114688
1231531071172435968
1231529093134520320
1231529028227653632
1231528415259430912
1231528081866809344
1231526921923629056
1231525524113121280
1231523385831763968
1231520430542008320
1231520366041808896
1231519583565205504
1231519398021804032
1231518712886329344
1231518336577626112
1231517819982041088
1231516936934240256
1231516090850783232
1231515100877594624
1231514031564951552
1231512501671604224
1231512289565724672
1231510461528625152
1231509850733109248
1231506151998730240
1231505235954294784
1231504072823525376
1231503530063626240
1231500586463481856
1231492776950407168
1231492571290984448
1231492470153916416
1231490530502004736
1231486045604188160
1231473802304876544
1231471247445368832
1231467406226264064
1231464362654732288
1231461051042074624
1231446926517604352
1231443676393504768
1231443213879324672
1231441271677259776
1231437456769241088
1231431770744053760
1231430194159923200
1231422013874544640
1231419176201310208
1231415858171273216
1231411977618120704
1231408838445678592
1231405785172803584
1231401602524815360
1231401585395326976
1231395358229565440
1231393792214929408
1231391303901966336
1231389645398671360
1231387419615694848
1231385326964346880
1231383958455279616
1231383875164655616
1231379705208672256
1231379059717873664
1231376410884923392
1231370756166078464
1231370693398421504
1231370380025180160
1231370165398495232
1231370033324003328
1231369096350126080
1231368840073957376
1231368252149784576
1231367564447637504
1231367364320677888
1231365511511973888
1231363425617481728
1231363240581586944
1231362295223242752
1231361044565483520
1231361044318228480
1231360290928943104
1231359144801816576
1231358490217795584
1231357073746792448
1231356443770654720
1231351153851609088
1231350749994668032
1231339009588125696
1231338084215775232
1231337666173521920
1231336450416922624
1231320544290725888
1231319025461997568
1231311133983854592
1231302798609915904
1231282562817052672
1231282172406964224
1231263624703991808
1231261428067205120
1231257195267985408
1231257039101419520
1231253743431081984
1231253403025727488
1231242556400439296
1231242296403865600
1231241764608053248
1231240089193402368
1231235640710266880
1231226400704778240
1231200904944082944
1231188661254815744
1231153823634395136
1237302376522014720
1237302172775321600
1237301908878090240
1237301359185219584
1237301008667205632
1237300990358867968
1237300773781823488
1237300573843730432
1237300390984638464
1237300338107076608
1237300143315128320
1237300115720765440
1237300097412628480
1237299909478486016
1237299576585031680
1237299544313847808
1237299514677100544
1237299475741278208
1237299077215326208
1237298579351441408
1237298563153121280
1237298532375089152
1237298109958389760
1237298024231186432
1237297971391275008
1237297941683097600
1237297811244408832
1237297401506992128
1237297400177451008
1237297333605449728
1237297103262683136
1237295862633639936
1237295701681471488
1237295221563625472
1237294630363967488
1237294219766779904
1237293999406247936
1237293628822671360
1237293348202962944
1237293111421702144
1237292877052407808
1237292749398798336
1237292566283980800
1237292545073393664
1237292416442306560
1237292253888106496
1237291667612450816
1237291545386196992
1237291356495765504
1237291109702926336
1237290594830962688
1237290034308485120
1237289476881371136
1237289467578331136
1237289322052751360
1237289270605426688
1237288740445392896
1237288399263780864
1237288390401220608
1237288151636271104
1237288021352951808
1237287944592867328
1237287920232476672
1237287383088824320
1237287151341101056
1237287109200920576
1237287101911220224
1237287071657721856
1237286833605808128
1237286750608711680
1237286722549006336
1237286206376943616
1237285698841055232
1237285354752876544
1237284657940529152
1237284647869898752
1237284555058372608
1237284104518983680
1237284003452870656
1237283859043147776
1237283480905678848
1237283340698316800
1237283298516193280
1237283296792510464
1237283296674861056
1237283258574024704
1237283140495978496
1237282447261339648
1237282346463891456
1237282306181619712
1237282109573775360
1237281892556099584
1237281558123425792
1237281306557505536
1237281071370248192
1237280780239470592
1237280695988506624
1237280536986562560
1237280025365426176
1237279979165147136
1237279543708340224
1237279184453541888
1237279148135133184
1237279018510057472
1237278348080033792
1237278328068935680
1237278306128584704
1237278276525015040
1237277637145497600
1237277109468397568
1237277028665171968
1237276904232812544
1237276845239918592
1237276762008158208
1237276703681994752
1237276686439395328
1237276625458397184
1237276553928638464
1237276548446793728
1237276326270205952
1237276274030080000
1237276014872535040
1237275902226182144
1237275746952826880
1237275274443718656
1237275037888987136
1237275018830270464
1237274915402850304
1237274670426132480
1237274453916123136
1237274266648883200
1237274093248032768
1237273944245313536
1237273855133130752
1237273849449689088
1237273839526174720
1237273829472419840
1237273785050509312
1237273760207683584
1237273523787378688
1237273344589934592
1237273147285680128
1237272803306430464
1237272462418743296
1237272393950924800
1237272080741289984
1237272015477690368
1237271973656506368
1237271972649635840
1237271560735653888
1237271484810375168
1237271479324041216
1237271191947108352
1237271168807243776
1237270477560860672
1237269750390165504
1237268250997784576
1237268211453898752
1237268197285302272
1237267904720183296
1237267470567669760
1237267459016544256
1237267044724281344
1237266751269801984
1237266666246926336
1237266652971954176
1237266138456887296
1237265097178963968
1237265064190763008
1237265054212460544
1237264815531397120
1237264561805250560
1237264405622128640
1237263580971577344
1237263350569906176
1237262797521571840
1237262591161925632
1237261919075139584
1237261483672629248
1237260647479607296
1237260518634795008
1237260281308307456
1237259678016393216
1237259284217565184
1237258826983845888
1237258807279063040
1237258781379174400
1237257170959433728
1237256887231365120
1237256598394793984
1237255868007079936
1237255109396041728
1237254738120409088
1237254347517542400
1237254292450484224
1237254205636857856
1237251973646290944
1237251849432023040
1237251845199781888
1237251620657860608
1237251076371263488
1237250699131604992
1237250122184097792
1237249564375040000
1237249322887995392
1237249235525021696
1237248403526090752
1237248401667952640
1237246655663083520
1237245833675972608
1237245831427825664
1237245763433852928
1237245544432463872
1237244325613846528
1237244204071309312
1237243995308384256
1237243895009828864
1237243868330024960
1237243543497793536
1237243202949664768
1237243070665482240
1237242832131198976
1237242439921856512
1237242130675924992
1237241773572972544
1237241738126909440
1237241176048074752
1237240536823668736
1237240116541710336
1237239462364659712
1237239461810966528
1237239150622978048
1237239089960824832
1237238725685334016
1237237760961974272
1237237708101021696
1237237494309060608
1237237487166160896
1237237120584101888
1237237112241618944
1237236932721233920
1237236739837775872
1237236670228881408
1237235088573624320
1237234258663612416
1237233220120268800
1237233174121459712
1237232410208735232
1237231846095638528
1237231337943244800
1237230723226099712
1237230675696267264
1237230467516182528
1237230372024225792
1237230086337642496
1237229988165844992
1237229785186779136
1237229561458364416
1237229115494862848
1237227991094030336
1237227844511686656
1237227621613621248
1237227332319866880
1237226943604568064
1237225992696938496
1237225816947212288
1237225571861639168
1237225522175913984
1237225430844760064
1237224763577315328
1237224395388551168
1237223993968480256
1237223822505283584
1237223405079760896
1237222491791261696
1237222031709466624
1237220146390827008
1237219971014389760
1237219216060645376
1237219156354895872
1237219124872278016
1237218872379531264
1237218393343680512
1237218336729174016
1237217917072277504
1237217767956393984
1237217302761873408
1237216947948773376
1237216382443544576
1237216355780194304
1237216343885090816
1237216215275315200
1237215474947166208
1237215073938149376
1237214867112722432
1237213868822274048
1237213838627557376
1237213236472287232
1237212356649922560
1237211456250101760
1237211072836272128
1237210573202264064
1237210191784890368
1237209825282592768
1237208876367228928
1237208780229746688
1237208387747639296
1237208107664601088
1237208103961219072
1237207031716761600
1237206682075164672
1237206262296621056
1237205964891262976
1237205781553938432
1237205762004353024
1237205601899499520
1237205288706387968
1237205062067408896
1237203418650824704
1237202500425412608
1237202253729185792
1237201411445850112
1237201091273654272
1237201026668789760
1237200748414414848
1237200340266688512
1237200152101699584
1237199814862999552
1237199559777976320
1237198991206387712
1237198819223375872
1237198642450239488
1237198283258441728
1237198253109784576
1237197833360437248
1237195868996087808
1237195831603847168
1237195735172603904
1237194781765369856
1237194555117768704
1237194545231581184
1237194101281431552
1237193441777344512
1237192453020516352
1237191107361964032
1237191066916356096
1237190955985338368
1237187910576656384
1237187051746816000
1237186574007308288
1237186035014041600
1237185936628174848
1237185923156070400
1237185552887304192
1237184585575698432
1237184519998001152
1237184270701072384
1237183928353472512
1237182914284027904
1237182831794610176
1237181503509082112
1237180700748591104
1237180557164978176
1237180391888322560
1237180297122217984
1237180063889514496
1237179799879196672
1237179744480833536
1237179202732011520
1237176483040227328
1237176241171521536
1237176042839826432
1237175863982133248
1237175533437423616
1237175359491186688
1237175214452035584
1237175055827771392
1237174933161197568
1237174635541692416
1237173825344765952
1237172707084480512
1237172174240301056
1237171653596995584
1237171322393944064
1237171197521076224
1237171171570987008
1237170765675495424
1237170644447629312
1237170291220021248
1237170291119456256
1237170197254963200
1237170179626242048
1237170050697699328
1237169728323493888
1237169549004419072
1237169395207733248
1237168934916198400
1237168425203453952
1237168130721378304
1237167599928172544
1237167515366756352
1237167208343564288
1237167167298125824
1237167011764953088
1237166962402308096
1237166782454083584
1237166632553697280
1237166573971894272
1237166375501737984
1237166369629704192
1237166276251799552
1237165518538379264
1237165470563926016
1237165155739258880
1237163821309014016
1237163772202176512
1237163388976926720
1237162854756896768
1237162449914212352
1237162330904911872
1237162299250573312
1237161722433150976
1237161605500006400
1237161289064955904
1237161252805361664
1237160854019362816
1237160820875853824
1237160450497880064
1237159979804553216
1237159967498608640
1237159752100126720
1237158946043019264
1237158726215196672
1237158726198595584
1237158427002130432
1237158151495061504
1237157605350440960
1237157283823521792
1237157021176168448
1237156469839142912
1237156391338606592
1237156209343361024
1237155967344824320
1237155690772340736
1237155589907570688
1237155408596422656
1237155375532724224
1237154358027931648
1237153820913930240
1237153346630356992
1237153285209022464
1237153265722236928
1237153261976780800
1237152746714861568
1237152508134469632
1237152235227840512
1237151767583956992
1237151335574720512
1237151331141419008
1237151200086196224
1237151119379296256
1237150930430197760
1237150596492169216
1237150574564564992
1237150304665296896
1237150096371965952
1237149917900128256
1237149176279863296
1237148659575218176
1237148114827595776
1237148056325414912
1237147669736222720
1237147497203728384
1237147401346936832
1237147246350622720
1237147149667688448
1237146807291056128
1237146702286598144
1237146315357749248
1237146258235707392
1237146154766413824
1237146130925989888
1237146113754509312
1237146054027431936
1237145166647103488
1237144867748433920
1237144201395126272
1237144148567822336
1237143706878296064
1237143667959369728
1237143492696178688
1237143367303258112
1237142422435565568
1237142151055708160
1237142011683241984
1237140998943313920
1237140293482356736
1237140093296455680
1237139948362326016
1237139851851395072
1237139634754207744
1237139376410329088
1237139330164023296
1237138975015546880
1237138918891556864
1237138820560281600
1237138730449866752
1237138495606530048
1237138373594267648
1237138136028848128
1237137683186618368
1237137599648739328
1237137477980176384
1237137475740540928
1237137440168607744
1237137400368738304
1237137137373523968
1237137131631411200
1237137083564777472
1237136955114168320
1237136923203760128
1237136583767162880
1237136366049386496
1237136282435891200
1237135987114827776
1237135888418779136
1237135857578127360
1237135672286339072
1237135545828085760
1237135503121580032
1237135190771851264
1237135026514464768
1237134592051642368
1237134436715638784
1237134329375076352
1237134174064201728
1237134173854486528
1237133976332054528
1237133758081511424
1237133658273861632
1237133209953013760
1237132940678533120
1237132933233668096
1237132805286563840
1237132792401666048
1237132691885047808
1237132301835755520
1237132010646315008
1237131634236932096
1237131442599190528
1237130600026423296
1237130595827879936
1237130486658535424
1237130356614201344
1237130322002743296
1237129944913895424
1237129937707991040
1237129793809928192
1237129039531446272
1237128934921306112
1237128890369409024
1237128624853209088
1237128527385972736
1237128280844562432
1237128110350499840
1237128066670919680
1237127823040659456
1237127761757704192
1237127558128336896
1237126607799812096
1237126556344082432
1237126504435326976
1237126483002511360
1237126436395376640
1237126424961658880
1237126131234439168
1237125609412796416
1237125415438880768
1237125201390944256
1237125178267754496
1237124994737401856
1237124987972182016
1237124800260251648
1237124781369102336
1237124752193413120
1237124752042414080
1237124679841861632
1237124549700796416
1237124265788551168
1237124251787784192
1237124217616961536
1237124149539147776
1237124072695312384
1237124054370242560
1237124031888883712
1237123887508275200
1237123407302381568
1237123268819238912
1237123085851131904
1237123038820343808
1237122908876660736
1237122654903164928
1237122251163500544
1237122004123357184
1237121999497035776
1237121746395959296
1237121618867937280
1237121570121945088
1237121451318222848
1237121207125843968
1237121165145059328
1237121158560038912
1237120994017329152
1237120991609802752
1237120977634381824
1237120968486785024
1237120811598831616
1237120658724851712
1237120591368540160
1237120446715187200
1237120134097121280
1237120044049600512
1237119969802047488
1237119874960408576
1237119825568305152
1237119718894505984
1237119718848258048
1237119657435443200
1237119508029960192
1237119393794011136
1237119275359514624
1237118979245629440
1237118942575038464
1237118857803939840
1237118844205969408
1237118649640443904
1237118412406611968
1237118021090643968
1237117999104036864
1237117873006481408
1237117763661041664
1237117416695627776
1237117350463385600
1237117009189572608
1237116935705419776
1237116506019966976
1237115880359821312
1237115624272396288
1237115423415586816
1237115286853222400
1237114952982224896
1237114498864967680
1237114281465982976
1237113863989899264
1237113708704182272
1237113354927386624
1237113181069365248
1237113141747527680
1237112596114935808
1237112239506755584
1237111671489015808
1237111620985409536
1237110943227752448
1237110919748096000
1237110696007159808
1237110679921803264
1237110579069882368
1237110470450065408
1237109735519903744
1237109490719358976
1237108675023720448
1237108534833283072
1237108434123751424
1237108014584340480
1237107990517465088
1237107986419666944
1237107574685577216
1237107544574885888
1237107426094129152
1237106405523496960
1237105845948776448
1237105813027766272
1237105799295614976
1237105329663610880
1237105305185550336
1237105280187617280
1237104960120041472
1237104388755390464
1237104156130922496
1237103242892333056
1237103030983626752
1237102464018440192
1237102358275993600
1237101869870141440
1237101666563952640
1237101662520717312
1237101418059837440
1237101400418586624
1237101353295646720
1237101159074140160
1237100980803481600
1237100878290497536
1237100875153158144
1237100844954378240
1237100661772345344
1237100549138526208
1237100517735759872
1237100179486056448
1237100098108129280
1237100065728192512
1237099973939826688
1237099900497801216
1237099897838501888
1237099524981653504
1237099435437498368
1237099138224963584
1237099094285463552
1237098890484162560
1237098802441596928
1237098738532757504
1237098554847637504
1237098327901999104
1237098174537437184
1237098172792451072
1237097718629249024
1237097638190673920
1237097545060569088
1237097517843492864
1237096609009336320
1237096531616059392
1237096400149721088
1237096080808062976
1237096036579016704
1237095574513516544
1237095266433609728
1237095156739964928
1237094553338941440
1237094171783180288
1237094165063892992
1237093448202825728
1237092986502209536
1237092980688859136
1237092873780244480
1237092846945083392
1237092815173115904
1237092780645679104
1237092760961847296
1237092621031481344
1237092530224840704
1237092255560679424
1237092176020062208
1237092170739433472
1237091982729564160
1237091894372556800
1237091759202713600
1237091730152964096
1237091539496710144
1237091535029747712
1237091428259463168
1237091349603799040
1237091047077040128
1237091021759991808
1237090981209669632
1237090881376866304
1237090780780658688
1237090335773184000
1237090252830978048
1237090181959823360
1237089365895122944
1237089056560988160
1237088911052222464
1237088869876629504
1237088783604092928
1237088295819128832
1237087809216921600
1237087639095869440
1237087583903125504
1237087474687578112
1237087335260532736
1237087160630640640
1237087097686831104
1237087032754745344
1237087003897778176
1237087003377729536
1237086819981889536
1237086725878558720
1237086560010543104
1237086472651538432
1237086139204251648
1237086020048478208
1237085861193400320
1237085771816816640
1237085522692014080
1237085492526624768
1237085355125374976
1237085346967552000
1237085183863635968
1237085169846235136
1237085039848030208
1237084382428647424
1237084185061478400
1237084041951809536
1237084016748236800
1237083546583326720
1237083531492446208
1237083360133926912
1237082774546395136
1237082773124456448
1237082740043812864
1237082655604248576
1237082380332150784
1237082329845202944
1237082239055409152
1237082159392772096
1237081789333516288
1237081722807881728
1237081525725822976
1237081525444694016
1237081456930959360
1237081454271762432
1237081311124369408
1237081153359597568
1237081115640221696
1237080883955257344
1237080716036526080
1237080505012686848
1237080355376693248
1237080347571040256
1237080278004371456
1237080202720796672
1237080151214772224
1237080003004768256
1237079563949260800
1237079387788300288
1237079192065449984
1237078981893120000
1237078819959443456
1237078627524673536
1237078473061122048
1237078359798165504
1237078347580145664
1237078316437450752
1237078119267192832
1237077899238199296
1237077465912102912
1237077364179374080
1237077346961764352
1237077080313155584
1237076451184259072
1237076280979394560
1237076065807413248
1237075922827857920
1237075842989273088
1237075728090497024
1237075706523176960
1237075309062750208
1237075218776162304
1237075189634076672
1237075176464027648
1237075061313548288
1237074935798956032
1237074812926713856
1237074645968474112
1237074469128228864
1237074444683743232
1237074114025852928
1237073873318940672
1237073707203510272
1237073683371474944
1237073404924170240
1237073308287410176
1237073304101572608
1237072872490913792
1237072269463162880
1237071904235753472
1237071904109928448
1237071761226649600
1237071453805260800
1237071028741967872
1237070940233781248
1237070909212635136
1237070793323892736
1237070698922860544
1237070672679120896
1237070645764272128
1237070626059440128
1237070457691615232
1237070338464395264
1237070217290887168
1237069998578962432
1237069824565678080
1237069530041438208
1237069436361879552
1237069337187450880
1237069238084517888
1237069230014697472
1237069155754541056
1237069150029139968
1237068707207303168
1237068273969225728
1237068150992142336
1237067976203014144
1237067754584367104
1237067654277599232
1237067459603152896
1237067446235942912
1237067130551468032
1237067038729920512
1237066870680780800
1237066328672014336
1237066234128142336
1237066068742397952
1237066003474980864
1237065748670865408
1237065558430027776
1237065511768227840
1237065480407523328
1237064694969634816
1237064647829860352
1237064634231914496
1237064615244124160
1237064595623329792
1237064459857920000
1237064410654539776
1237064354505228288
1237064153329590272
1237063680468168704
1237063667633487872
1237063530081370112
1237063096239362048
1237063095748452352
1237062731322339328
1237062070614581248
1237061974263042048
1237061610826498048
1237061586247974912
1237061344605569024
1237061029575766016
1237060642852519936
1237060580302716928
1237060332826300416
1237060075933413376
1237059913584697344
1237058264107569152
1237058194003943424
1237057794563624960
1237057594155466752
1237057587012485120
1237057440882950144
1237057390157221888
1237056792183672832
1237056673715556352
1237056561585049600
1237056331502231552
1237056058285162496
1237056041822584832
1237055863568859136
1237055546211139584
1237055393374916608
1237054660877434880
1237053254212747264
1237053042681208832
1237053031067168768
1237052535426494464
1237052214989844480
1237051641599266816
1237051287557963776
1237051267173752832
1237050604373061632
1237050530909671424
1237050525637423104
1237050469303881728
1237049898006085632
1237049789566631936
1237049636449390592
1237049472741408768
1237048931084898304
1237048662011703296
1237048056018862080
1237047996589563904
1237047857129107456
1237047503347949568
1237047372036870144
1237046862701608960
1237046486137024512
1237046040999669760
1237045661394251776
1237045540296278016
1237045478346326016
1237045346771128320
1237045048925192192
1237044788110725120
1237044466050977792
1237044398157975552
1237044396761251840
1237044395393851392
1237043788159299584
1237042917090439168
1237042138665439232
1237042073909391360
1237041648124727296
1237041053888380928
1237040472209666048
1237040161109749760
1237039898248577024
1237039877327380480
1237039809589280768
1237039451014156288
1237038733087539200
1237038439675068416
1237038392396972032
1237038214357139456
1237038027656003584
1237037931161956352
1237036841569792000
1237036685273202688
1237036671901642752
1237036480746467328
1237036213737000960
1237036205600096256
1237035804951826432
1237035790141702144
1237035745627574272
1237035548633632768
1237035533815238656
1237035012681281536
1237034951150841856
1237034949636743168
1237034794124341248
1237034407011237888
1237034396324159488
1237034226962305024
1237033979045347328
1237033685855150080
1237033637863964672
1237033468892041216
1237033164272537600
1237033145091928064
1237032947083083776
1237032503770308608
1237032369384820736
1237032301726437376
1237032285033115648
1237031919738589184
1237031564254629888
1237031495669133312
1237031443844534272
1237031401498820608
1237031340006129664
1237031101677408256
1237030863805784064
1237030469587415040
1237030401526415360
1237030399462838272
1237030384182988800
1237030382110789632
1237029323837759488
1237028599124951040
1237028575364239360
1237028367049691136
1237028176813076480
1237027563991707648
1237027361712943104
1237027317014302720
1237027284298727424
1237026578049236992
1237026398797213696
1237025911729467392
1237025891563089920
1237025741847527424
1237025710990143488
1237025635920498688
1237025536024731648
1237025372736237568
1237025174719025152
1237025162215686144
1237025000927920128
1237024922045685760
1237024721633501184
1237024704680136704
1237024662850359296
1237024291679592448
1237024262277468160
1237024251074486272
1237023985109536768
1237023258689626112
1237023220680671232
1237022941885456384
1237022939008176128
1237022484530180096
1237022450849853440
1237022234855780352
1237022161216421888
1237021649314156544
1237021484045885440
1237020479246012416
1237020314141249536
1237020042837057536
1237019832098402304
1237019588954554368
1237019291473477632
1237019074959310848
1237018725070635008
1237018446405292032
1237018364297580544
1237018143203172352
1237018116229652480
1237017934175690752
1237017365356990464
1237017169805946880
1237017056114905088
1237016299408154624
1237016176015728640
1237015951016689664
1237015864492294144
1237015667787722752
1237015550439477248
1237015530810355712
1237015501966061568
1237015338291773440
1237014973580279808
1237014684240314368
1237014661867778048
1237014603667668992
1237014455113875456
1237013962220339200
1237013780132810752
1237013582036033536
1237013484942036992
1237013348518187008
1237012263027879936
1237011785884086272
1237011637988622336
1237011505947779072
1237011145279635456
1237010816517505024
1237010474010542080
1237010314782281728
1237010282557440000
1237010263607513088
1237010178475786240
1237010132501803008
1237009823549526016
1237009726237532160
1237009723867779072
1237009623460257792
1237009506665664512
1237009187760193536
1237008875238244352
1237008849728606208
1237008826894819328
1237008522707165184
1237008519997652992
1237008504499720192
1237008459050164224
1237008415152578560
1237008408668241920
1237008387046506496
1237008351529250816
1237007983021883392
1237007723041918976
1237007043791388672
1237006827847647232
1237006704392503296
1237005866848657408
1237005823374757888
1237005745213902848
1237005600590086144
1237005565718659072
1237005438111166464
1237005002574417920
1237004743492292608
1237004097468989440
1237004064652767232
1237004063541268480
1237003963716849664
1237003820040884224
1237003714390568960
1237003422307680256
1237003225183780864
1237003171962257408
1237003125128658944
1237003073018638336
1237002854050729984
1237002714216689664
1237002676245856256
1237002583958528000
1237002507966177280
1237002160740671488
1237002079769694208
1237001470937006080
1237001010356330496
1237000966492348416
1237000807821737984
1237000774900690944
1237000215669944320
1237000046522007552
1236999942603853824
1236999900102930432
1236999897162940416
1236999795459358720
1236999793248997376
1236999769224089600
1236999693982408704
1236999300657315840
1236999057811234816
1236998812708700160
1236998419786264576
1236998333240995840
1236998103741407232
1236998101178687488
1236997962074591232
1236997958492655616
1236997134563622912
1236997019090268160
1236996760838508544
1236996757986381824
1236996749669081088
1236996747106246656
1236996718643884032
1236996526624342016
1236996469472755712
1236996406495215616
1236996406411325440
1236996342926512128
1236996322558910464
1236996299192299520
1236995789555023872
1236995738581848064
1236995731476578304
1236995479755313152
1236995472218357760
1236995328928350208
1236995148216561664
1236994905852882944
1236994678886666240
1236994669336199168
1236994423206141952
1236994364238442496
1236994334551093248
1236994037145534464
1236993891661942784
1236993547020222464
1236993479642877952
1236993371077574656
1236993190097563648
1236992835339116544
1236992769912004608
1236992632133316608
1236992631772569600
1236992532338393088
1236992207158009856
1236992181149159424
1236992157426343936
1236992062664343552
1236991811106766848
1236991625273933824
1236991581418291200
1236991392414564352
1236991305164578816
1236991244162732032
1236991112402927616
1236991016470818816
1236991001551609856
1236990917007073280
1236990758844018688
1236990734055563264
1236990664543481856
1236990115324596224
1236989759475421184
1236989581649739776
1236989533654257664
1236989172570882048
1236988950809624576
1236988793208668160
1236988270518710272
1236988187119099904
1236987853600628736
1236987598628741120
1236987558929760256
1236987440176324608
1236987381502414848
1236986880731893760
1236986777757519872
1236986622618583040
1236986393441775616
1236986359308484608
1236986167746277376
1236985895846371328
1236985883116666880
1236985875239763968
1236985855346126848
1236985844130594816
1236985578580668416
1236985297184755712
1236985280399319040
1236985199692402688
1236985094260297728
1236985081463320576
1236985036622135296
1236984737291517952
1236984720048754688
1236984572014989312
1236984488581873664
1236984170787766272
1236983819766554624
1236983779782254592
1236983735746207744
1236983630746071040
1236983531177480192
1236983505478750208
1236983200397828096
1236983158005846016
1236983137739182080
1236983034630541312
1236982548338597888
1236982493766615040
1236982461252452352
1236982151591219200
1236981959219388416
1236981832425639936
1236981784891609088
1236981700183261184
1236981532742516736
1236981027777777664
1236980908139388928
1236980287978065920
1236980210379128832
1236980195225034752
1236980048512593920
1236979823010029568
1236979734040494080
1236979728411774976
1236979564233895936
1236979560320663552
1236979348378472448
1236979173421441024
1236978790519074816
1236978766909448192
1236978444602421248
1236978434301140992
1236978406388047872
1236978337609920512
1236978324829884416
1236978302625165312
1236978233125621760
1236977964551634944
1236977895278546944
1236977794028122112
1236977775451439104
1236977555825188864
1236977454167752704
1236976915744993280
1236976794097659904
1236976707476828160
1236976694927527936
1236976496553664512
1236976438731059200
1236976315439501312
1236976109880782848
1236976020311416832
1236975975323361280
1236975605779963904
1236974660392108032
1236974499108663296
1236974344456282112
1236974295139614720
1236974090721865728
1236973333998166016
1236973293636370432
1236972660615254016
1236972423406333952
1236972192107298816
1236971821322428416
1236971787876958208
1236971336720887808
1236971096487985152
1236971014044729344
1236971008973836288
1236970752655544320
1236970463592615936
1236970416931049472
1236969985546674176
1236969869532450816
1236969530993381376
1236969444338958336
1236969379314708480
1236969320317628416
1236969253464608768
1236969227455782912
1236969166076329984
1236969009846915072
1236968999058935808
1236968874886782976
1236968595403522048
1236968054522884096
1236968041554096128
1236967696492834816
1236967493018816512
1236967360600264704
1236967242123919360
1236967086351679488
1236966317690892288
1236966303031795712
1236966207342837760
1236966175004938240
1236965973405523968
1236965486728003584
1236965475264925696
1236965289692221440
1236965171375063040
1236965036410667008
1236965000721334272
1236963537412481024
1236963488507015168
1236963343379939328
1236963217701732352
1236962581497229312
1236962515105579008
1236962432435671040
1236961863847620608
1236961395469627392
1236961245720449024
1236961128661561344
1236961016161996800
1236960730894798848
1236960613378727936
1236960322398937088
1236960307785891840
1236960191138025472
1236960183462453248
1236960056714727424
1236959545970298880
1236959168747143168
1236958707285667840
1236958687261904896
1236958485520289792
1236958422651691008
1236958192522989568
1236958100122415104
1236958067339571200
1236958049950150656
1236957653479444480
1236957616632475648
1236957558818160640
1236957035599560704
1236956909036605440
1236955465818542080
1236955097709543424
1236955039496908800
1236954461043646464
1236954387647430656
1236953309161959424
1236952860740349952
1236952758432878592
1236951387495415808
1236950891971969024
1236950781502214144
1236950681614831616
1236950610945036288
1236950117040771072
1236950105833574400
1236949925918801920
1236949863755104256
1236949859544051712
1236949609726926848
1236948200088571904
1236948177745575936
1236947161906065408
1236947144826912768
1236947023783493632
1236946732010729472
1236946611043020800
1236946272269012992
1236946209308168192
1236945437984198656
1236945407856558080
1236945216705302528
1236945178008489984
1236944996294524928
1236944816425979904
1236944360941502464
1236944328414515200
1236944223942905856
1236943455298949120
1236943348763680768
1236943015643578368
1236942990012297216
1236942874408824832
1236942672385933312
1236942648193298432
1236942474880434176
1236942420937453568
1236942350821330944
1236942299793199104
1236940942231339008
1236940437253955584
1236940001172172800
1236939786658525184
1236939755537006592
1236938811453722624
1236938729199206400
1236938670235500544
1236938500194414592
1236938414160740352
1236938413300805632
1236937563551694848
1236937322786099200
1236937123674165248
1236936986633658368
1236936850377490432
1236936845193248768
1236936549285191680
1236936263871184896
1236936029036314624
1236935946882486272
1236935008578920448
1236935005240254464
1236934132250193920
1236933854717456384
1236933627021275136
1236932897468080128
1236932757432999936
1236932650197270528
1236932184834854912
1236932138592636928
1236931279817330688
1236930254142418944
1236929835831889920
1236929790998970368
1236928972610514944
1236928732130095104
1236928247746592768
1236927980129181696
1236927959484764160
1236927934339956736
1236927687144304640
1236927440074821632
1236927345312837632
1236927225699721216
1236927200240316416
1236926685120995328
1236926582226214912
1236925312853778432
1236925029058633728
1236924273027174400
1236923110483537920
1236922133604904960
1236921908802830336
1236921707660640256
1236920908901572608
1236920908809474048
1236920666521325568
1236920252618936320
1236920245606023168
1236920140144533504
1236919986465185792
1236919934342639616
1236919929074573312
1236919690024361984
1236919654448324608
1236919434993897472
1236919373387960320
1236919213761200128
1236917916966232064
1236916889798000640
1236916858256863232
1236916684256169984
1236916527108104192
1236916411559219200
1236916258735403008
1236915432835055616
1236915145235890176
1236915120741257216
1236915013605965824
1236914942562926592
1236914828297502720
1236914656939315200
1236914642573721600
1236914302084399104
1236913102848999424
1236912976776568832
1236912626027974656
1236912617148436480
1236912530032754688
1236912399757836288
1236912193377099776
1236911623295496192
1236911622461030400
1236911495751118848
1236911247876149248
1236910838721777664
1236910419542933504
1236909611627708416
1236908354141904896
1236908331861602304
1236907997668036608
1236907201962205184
1236906365899214848
1236906359586787328
1236905855519469568
1236905809478660096
1236905671414685696
1236905340781936640
1236904726400315392
1236904290645454848
1236903934075289600
1236903192962699264
1236902114573647872
1236902052007227392
1236902034734870528
1236900900733464576
1236900253623816192
1236899745592827904
1236899364305539072
1236899248354009088
1236898518939426816
1236896426447327232
1236896117347897344
1236895635091021824
1236894963251757056
1236894196461490176
1236893745787932672
1236893390941425664
1236893382829465600
1236893245373906944
1236892645550514176
1236892129374490624
1236891968254459904
1236891196309434368
1236891002939396096
1236889838441230336
1236889809378918400
1236888957855494144
1236888795993104384
1236888738212589568
1236887269274988544
1236885522842255360
1236884992006828032
1236883757258485760
1236881980488167424
1236881626405240832
1236879984972771328
1236879059973361664
1236878910534692864
1236878329631903744
1236878054980489216
1236877162923225088
1236876877337440256
1236875543410286592
1236875152715104256
1236873507356782592
1236873419225882624
1236873185062031360
1236869850628145152
1236865706982957056
1236863979609186304
1236857994358513664
1236857869942886400
1236856142505988096
1236855989065973760
1236855379734208512
1236854757618110464
1236853413792624640
1236852523073503232
1236852521404190720
1236851891893608448
1236851765737328640
1236851533938999296
1236851391479635968
1236848198741708800
1236847239995293696
1236846985514278912
1236846916047998976
1236844675408920576
1236844076835557376
1236843281176080384
1236842566005297152
1236842011774386176
1236839835803009024
1236839710498185216
1236839472404107264
1236839004194009088
1236838862120419328
1236837635764576256
1236835091080347648
1236835014345543680
1236834717359460352
1236833785028718592
1236832934528782336
1236832450602557440
1236832395883511808
1236831767417499648
1236831152016633856
1236831150053736448
1236829909311422464
1236829817988763648
1236829341096517632
1236829252856807424
1236827929796997120
1236825807915552768
1236823896067682304
1236823569470033920
1236820882527567872
1236819573565001728
1236819462470303744
1236817491600510976
1236817074179227648
1236816199264190464
1236815795927343104
1236815507917017088
1236814468585152512
1236811509902258176
1236811395959648256
1236811272475357184
1236811061967196160
1236810390631141376
1236809414637543424
1236808570190139392
1236807042788032512
1236806969496764416
1236806272952881152
1236806174764220416
1236804287826513920
1236804025544302592
1236803887798968320
1236802432736378880
1236801803980808192
1236801326706831360
1236799615099383808
1236799468151943168
1236799414041219072
1236799361004101632
1236799339323723776
1236799264325541888
1236799199586308096
1236797624314986496
1236797207220805632
1236796506373607424
1236794981735694336
1236794622170595328
1236794573076271104
1236794350018887680
1236793691076870144
1236793529936089088
1236791304878616576
1236790864296529920
1236790807027494912
1236790771421978624
1236789570043359232
1236788615411367936
1236787121647759360
1236786059087757312
1236785810537512960
1236785099192008704
1236784360025739264
1236784102029668352
1236784009847472128
1236783649711890432
1236782270473797632
1236782023194402816
1236780231941337088
1236780090308079616
1236780084863918080
1236779865589702656
1236779500999860224
1236777715392372736
1236777675089461248
1236777369081384960
1236776848329027584
1236776454962151424
1236776430781988864
1236773215344656384
1236772968321122304
1236772464052535296
1236771648776396800
1236770682576519168
1236769989320982528
1236767423099002880
1236766139117703168
1236765943121866752
1236765230555938816
1236764110852939776
1236762387526664192
1236762132059959296
1236762098857914368
1236761748448989184
1236761163175772160
1236761131655577600
1236759784046710784
1236759388993531904
1236759140636282880
1236758537801523200
1236758420801421312
1236758220909264896
1236758119558103040
1236757980470747136
1236757922211864576
1236757069350555648
1236756413101346816
1236754742057021440
1236754635945320448
1236754104401174528
1236753692478627840
1236752215311818752
1236752102443167744
1236751092588871680
1236750684697104384
1236750536239542272
1236749592814858240
1236749538930589696
1236749315881787392
1236749227897864192
1236749036025073664
1236748405822627840
1236747264770490368
1236746660132188160
1236743999303475200
1236743741676777472
1236743628665442304
1236743493000757248
1236742096914198528
1236741947584319488
1236740327928725504
1236739715149312000
1236739668101795840
1236738959918518272
1236738477900754944
1236738195762688000
1236736792046514176
1236735949519949824
1236735556114984960
1236735072738234368
1236734725777027072
1236734327431532544
1236734008827863040
1236733497009561600
1236733236572807168
1236730705792634880
1236729895037947904
1236727886926745600
1236727527076478976
1236727043670315008
1236726269322170368
1236725108422717440
1236724223957184512
1236723094481448960
1236722646785687552
1236722098082545664
1236721287403364352
1236721221506609152
1236720986176860160
1236720848502951936
1236720772774866944
1236720216501035008
1236720051971129344
1236719986795634688
1236719439472664576
1236719273025966080
1236718691405856768
1236716930565902336
1236715580423577600
1236713987703619584
1236713798783959040
1236713439256612864
1236711688054980608
1236711618697990144
1236711400946491392
1236711095030755328
1236710922707746816
1236710338604793856
1236709460606955520
1236709264342880256
1236708519727886336
1236706668995543040
1236706187707584512
1236706095923703808
1236705793224904704
1236705220102586368
1236704338145415168
1236704115356340224
1236703634664108032
1236703361774366720
1236703205184200704
1236701628423684096
1236701456155250688
1236699531263213568
1236698202407161856
1236696142521536512
1236695932189712384
1236695040925237248
1236694750268440576
1236694070954786816
1236693937156431872
1236693235290066944
1236692418692386816
1236691394200248320
1236690968486821888
1236690653880487936
1236690509009125376
1236690176128278528
1236688891094208512
1236688756759027712
1236687641615220736
1236687257463119872
1236687132196065280
1236686876511174656
1236684659406274560
1236683802442731520
1236683604354314240
1236683262447300608
1236683096121991168
1236683033077374976
1236682224570978304
1236681128427180032
1236680321355177984
1236680188597018624
1236679826603294720
1236679528023547904
1236679525020377088
1236679464987344896
1236679093648625664
1236678550851379200
1236678415937417216
1236677688322076672
1236677073542012928
1236676470333788160
1236676309180395520
1236675057859973120
1236674743996239872
1236674596776132608
1236674495160688640
1236673669591515136
1236673597374189568
1236672490308542464
1236671804799844352
1236670509078712320
1236670397040320512
1236669203882504192
1236668759328395264
1236668606903173120
1236668038981844992
1236667998825582592
1236667892961120256
1236667824162177024
1236666757621977088
1236666191256657920
1236665954077032448
1236663714268377088
1236663616826298368
1236663360302616576
1236661954573451264
1236660886720393216
1236660466593738752
1236660403444363264
1236659597341007872
1236659437647081472
1236658938982039552
1236657839910895616
1236657295351844864
1236655676102807552
1236654988908167168
1236653943096311808
1236653913891385344
1236653871776378880
1236653216563109888
1236652897338822656
1236652781571903488
1236652206390157312
1236652028769660928
1236651886452846592
1236651557564739584
1236650341262856192
1236649807663562752
1236649443417522176
1236649380939214848
1236649219433402368
1236647912144162816
1236647848936079360
1236647795047751680
1236647206851088384
1236647189629329408
1236646349954617344
1236646292828434432
1236646141514702848
1236645101419495424
1236645044741906432
1236644961686376448
1236642719512100864
1236642232515596288
1236641776326381568
1236641641408200704
1236641606695964672
1236641568494403584
1236640536846635008
1236640232432381952
1236640090362990592
1236639052943810560
1236639050905329664
1236638813507563520
1236638584481996800
1236638395151069184
1236637800977420288
1236637198851719168
1236636985705594880
1236636830013030400
1236636755043987456
1236636699784097792
1236636144894390272
1236635296625766400
1236635215872876544
1236634916202389504
1236634510403354624
1236634229074788352
1236634038456238080
1236633378578980864
1236633344558993408
1236632989208989696
1236632435426615296
1236632393441619968
1236632390530891776
1236632316115660800
1236632217406918656
1236632191926292480
1236631208844558336
1236631133636288512
1236631024471363584
1236630855394693120
1236630487776575488
1236630160507432960
1236629976994041856
1236629834580873216
1236629111143124992
1236629050292084736
1236629005832503296
1236628270302388224
1236627357034840064
1236627188134404096
1236627118395658240
1236626097464320000
1236625732866060288
1236625322998730752
1236625111387475968
1236624661938569216
1236623836457709568
1236623823522455552
1236623796087459840
1236623720434851840
1236623476993282048
1236623070552641536
1236622678506852352
1236622481504550912
1236622426546540544
1236622229628223488
1236621944952442880
1236621636960485376
1236621249977163776
1236621248215515136
1236621013720449024
1236620829670158336
1236620485045235712
1236620447611052032
1236620021268275200
1236619749389467648
1236619560360595456
1236619113910251520
1236618638985232384
1236618447926288384
1236618439604781056
1236618435456573440
1236618174642057216
1236617826103963648
1236617565235032064
1236617182076973056
1236616195689844736
1236615658772692992
1236615144982982656
1236614851012841472
1236614717189341184
1236614451530551296
1236613629946007552
1236612580203884544
1236612379905007616
1236611670866300928
1236611669696155648
1236610391574114304
1236610271919177728
1236610178432335872
1236609547621601280
1236609505267527680
1236609498720026624
1236609472447033344
1236609306369368064
1236607618648588288
1236607258068496384
1236607194663194624
1236607168196923392
1236606603605901312
1236606515634524160
1236606034564841472
1236605652597964800
1236604591048966144
1236603880269590528
1236603700283682816
1236603519899258880
1236603449267179520
1236602482001956864
1236602305010688000
1236602043726532608
1236601828466470912
1236601197240496128
1236600974933929984
1236600803953172480
1236600385042866176
1236600001704472576
1236599925896511488
1236599481631678464
1236599303151312896
1236599111299678208
1236598563565645824
1236598283147120640
1236597849082773504
1236596992006074368
1236595535387205632
1236594937229119488
1236594202210902016
1236593862321242112
1236593329602781184
1236592830279299072
1236592639694249984
1236591795938738176
1236591481567281152
1236591429293613056
1236590524229996544
1236589989435064320
1236589869872357376
1236589708781801472
1236589695825522688
1236589473225416704
1236589433975115776
1236589254639120384
1236588813515919360
1236588019936833536
1236587972612546560
1236587601189941248
1236587051186782208
1236586956345217024
1236586008960995328
1236585764072218624
1236585738944339968
1236585625412911104
1236585001233387520
1236584450210689024
1236583709870043136
1236582767409778688
1236582666796961792
1236582496164339712
1236582209970192384
1236581320102490112
1236581298514399232
1236581220831637504
1236581136211591168
1236581110857039872
1236580283115282432
1236579852972482560
1236578922382462976
1236578876442148864
1236578663966969856
1236578427756371968
1236577396087758848
1236576818599206912
1236576760612786176
1236576679948148736
1236576044804706304
1236575914026246144
1236575518478061568
1236575073085067264
1236575012179652608
1236575005334548480
1236575003614863360
1236574959230738432
1236574418723373056
1236574398473109504
1236573861111627776
1236573646438703104
1236572141484511232
1236571958105563136
1236571957405122560
1236571955475746816
1236571848520994816
1236571585525567488
1236571577782882304
1236571539534942208
1236571377957822464
1236570365687627776
1236569645949153280
1236569501820432384
1236568605698867200
1236567973193822208
1236567437614755840
1236566912362045440
1236566909224697856
1236566583973208064
1236566511688601600
1236566315403534336
1236565872287891456
1236564422686113792
1236562298539520000
1236561881088884736
1236561319253487616
1236559569666609152
1236559494190182400
1236559468306944000
1236559335968378880
1236559034443902976
1236554847736004608
1236553229556748288
1236550849847058432
1236548465892528128
1236547147291557888
1236546610567380992
1236539952223014912
1236539695087136768
1236539671615807488
1236535971950333952
1236535164353818624
1236535133118894080
1236532219524583424
1236528131487350784
1236526831672541184
1236526297108697088
1236524321616494592
1236520095565963264
1236517481516339200
1236516818711392256
1236516133567705088
1236515418547695616
1236514668362989568
1236510271541133312
1236503558792581120
1236502107546685440
1236498496812765184
1236494612883103744
1236493687497969664
1236492375582576640
1236492075685863424
1236487920439050240
1236487539290181632
1236486889831424000
1236486876615323648
1236486654212182016
1236484235189338112
1236483064236322816
1236477477653852160
1236476980075298816
1236476293371383808
1236475658395693056
1236475482071130112
1236474270915522560
1236471730505482240
1236467855257792512
1236465163605164032
1236462530135908352
1236462358802948096
1236459415470886912
1236458713155846144
1236457858318733312
1236456629475966976
1236453290952593408
1236452613379502080
1236450846017310720
1236449794559787008
1236448141181845504
1236447485834518528
1236446369910407168
1236444857998233600
1236444645787340800
1236444590204387328
1236444368325623808
1236442518147026944
1236441138699161600
1236440970972917760
1236440418629320704
1236439521505480704
1236438726420684800
1236436882302676992
1236435244573585408
1236434729592856576
1236432981889290240
1236432599096135680
1236432168525524992
1236431685341847552
1236427856638607360
1236427207771410432
1236426865876877312
1236426148789157888
1236425634722783232
1236422763440717824
1236422217568669696
1236421887258955776
1236420360649703424
1236420113135554560
1236418575935528960
1236418240634593280
1236417340897734656
1236416861832691712
1236414060054249472
1236413139060736000
1236412191315648512
1236412115897982976
1236409568898560000
1236407676709601280
1236407628634263552
1236406815010758656
1236406807901462528
1236405996605640704
1236405437823692800
1236403250485760000
1236402499961212928
1236401872526770176
1236401531710291968
1236400585102016512
1236400225641803776
1236397973938061312
1236395968477556736
1236395425021616128
1236394871054893056
1236394719271403520
1236393300304842752
1236393035535134720
1236391788752982016
1236390630479335424
1236390405043884032
1236390387113230336
1236388773467996160
1236388322467086336
1236387871646461952
1236387315657965568
1236387166349131776
1236387008865619968
1236386135217070080
1236386135099596800
1236383187292602368
1236382623104040960
1236382453138436096
1236378585423843328
1236377769178796032
1236377759762481152
1236377327262629888
1236374966205104128
1236374827814064128
1236374766719832064
1236371550674333696
1236371467434176512
1236369544957968384
1236368413070700544
1236367459151515648
1236367209745788928
1236364322483437568
1236363176570224640
1236362772998426624
1236362511462682624
1236361516808654848
1236359237300879360
1236358796139794432
1236358523321290752
1236355939210596352
1236355212199124992
1236353571542560768
1236353277471657984
1236353204675362816
1236352923883495424
1236352888760344576
1236352864995475456
1236352859400257536
1236351614845214720
1236351570431918080
1236351132139544576
1236351002460160000
1236350945279143936
1236350541489418240
1236350053305942016
1236349377402277888
1236349302076776448
1236348639296901120
1236347940941312000
1236347650007429120
1236347189263286272
1236346719958446080
1236346248271220736
1236345420231499776
1236343353161076736
1236342215741489152
1236342154072592384
1236341864913162240
1236341660709269504
1236341507940024320
1236340765896388608
1236339801252495360
1236337992773578752
1236337979976749056
1236337879665774592
1236337336314515456
1236336096163872768
1236336043261034496
1236335833407463424
1236334797473091584
1236334461404545024
1236333547813851136
1236333305651507200
1236332923676053504
1236328313922244608
1236328296989720576
1236328278287212544
1236328137866149888
1236327948933828608
1236327161004351488
1236326265939832832
1236326223069970432
1236326102139842560
1236322882755706880
1236322722151612416
1236322506807508992
1236321920280399872
1236321467396173824
1236321344989458432
1236320397856919552
1236317628249112576
1236317381892374528
1236316507719819264
1236314282150764544
1236313934321397760
1236313784081436672
1236313460822151168
1236310746243440640
1236309649277759488
1236309489416011776
1236308369838915584
1236307906217172992
1236307500888215552
1236306386969079808
1236306277388693504
1236306252013035520
1236306226243305472
1236305374631755776
1236303937679966208
1236303405527625728
1236303096831037440
1236302353428631552
1236301814288601088
1236301570385403904
1236301274750074880
1236301163567472640
1236299363615309824
1236299362046705664
1236298804854427648
1236298674860224512
1236297867578486784
1236293717545361408
1236293659127054336
1236293538934968320
1236293497050656768
1236293106657423360
1236292801123569664
1236292688506486784
1236292136531906560
1236291946823516160
1236291671651946496
1236291647442313216
1236291186597466112
1236290526103646208
1236289741580050432
1236289694423494656
1236289075684020224
1236287350830923776
1236286242246914048
1236286084679708672
1236286027645452288
1236285096736497664
1236284213730529280
1236283519439187968
1236281841172217856
1236281559747084288
1236280981713293312
1236280451591012352
1236279683764740096
1236279453141086208
1236279187226460160
1236279147040854016
1236279071383982080
1236278517756825600
1236278348072042496
1236278313003307008
1236278312890028032
1236278070404939776
1236277624982380544
1236277432937664512
1236277423362191360
1236276672615403520
1236276618110423040
1236276184490573824
1236276066118971392
1236275197042479104
1236274574007951360
1236274220725866496
1236272145103126528
1236271646589280256
1236270935692500992
1236270430509584384
1236270372405874688
1236270295117422592
1236270202058428416
1236269918531792896
1236269763078361088
1236269690399457280
1236268700296253440
1236268564656672768
1236268211756306432
1236268050929848320
1236267912584929280
1236267325722169344
1236267267387731968
1236266863316701184
1236266063169343488
1236264564729282560
1236264215243108352
1236264073471365120
1236262847589556224
1236262469443747840
1236262297561116672
1236262010008076288
1236261686644006912
1236259763916341248
1236259678822301696
1236259352039829504
1236258996106993664
1236258754221486080
1236256999823880192
1236256661507133440
1236256240289714176
1236256027928133632
1236255273351884800
1236255272940658688
1236254786284064768
1236254701261402112
1236254380309045248
1236254081594818560
1236253921632542720
1236252757742383104
1236252493140590592
1236252117255573504
1236251594443886592
1236250381895602176
1236250336370872320
1236250256221908992
1236249787613278208
1236249767413534720
1236249743598260224
1236249371295059968
1236249277535531008
1236247662929862656
1236245261791289344
1236244733464375296
1236244590031601664
1236244415854804992
1236244398372982784
1236244113219104768
1236243481812594688
1236243355862003712
1236242763823353856
1236241431796297728
1236240773349335040
1236240753078046720
1236240594088996864
1236239795275382784
1236239453766782976
1236239368446267392
1236239012848971776
1236238847765291008
1236238492902084608
1236238049941602304
1236237688765898752
1236236757345148928
1236235363829657600
1236235044127113216
1236234019798282240
1236233922863915008
1236233915033096192
1236233894082621440
1236233881864392704
1236233759197933568
1236233337754312704
1236232751176654848
1236231609797525504
1236230698761142272
1236230631090270208
1236230229921759232
1236230148938182656
1236229794242662400
1236228880987496448
1236228524689829888
1236228505316319232
1236228200474259456
1236228184250740736
1236227751314624512
1236227727536951296
1236226412769574912
1236226332255809536
1236223294409490432
1236221485234167808
1236220583014060032
1236219845659762688
1236219750629470208
1236219586313416704
1236219553723670528
1236218905611448320
1236218710815170560
1236218294228660224
1236217524267573248
1236217074420264960
1236216475553234944
1236214534408413184
1236214469543501824
1236213804901548032
1236213661854838784
1236213496565641216
1236213406421614592
1236213060399968256
1236212552734052352
1236212550594936832
1236211987664732160
1236211545689989120
1236211376806400000
1236210725502291968
1236209791212675072
1236209742797824000
1236209687260999680
1236209179213336576
1236208803005304832
1236207697436893184
1236207457787146240
1236207142333530112
1236206737545408512
1236206493084659712
1236206461950160896
1236206226905722880
1236206083024224256
1236205981270491136
1236205305337458688
1236205245031690240
1236205169773330432
1236204934309105664
1236204819129524224
1236204456104153088
1236204384284966912
1236203834558558208
1236203409994375168
1236202977486086144
1236202047944429568
1236201051247779840
1236200481023762432
1236200305324363776
1236200191621058560
1236200028986802176
1236199735897227264
1236199467302387712
1236198111829086208
1236196156260024320
1236195739866447872
1236195622203592704
1236195439801700352
1236195026776010752
1236194079664484352
1236193365009371136
1236192886913404928
1236192528111558656
1236192064062124032
1236191606275035136
1236190928626487296
1236190596563427328
1236187883406422016
1236187119942582272
1236186801120759808
1236186315064061952
1236186154376089600
1236186057978318848
1236185005379985408
1236184831039377408
1236184576889729024
1236184322077388800
1236183744043606016
1236183306443436032
1236180930886320128
1236179480860860416
1236179178032173056
1236176442049822720
1236175841836531712
1236175707623088128
1236175501917446144
1236175474893762560
1236174884067332096
1236174853646016512
1236172282487140352
1236171862167547904
1236171374638612480
1236170800006180864
1236169774532616192
1236169375209553920
1236169078647050240
1236168408510717952
1236168372837953536
1236168084676734976
1236167823107350528
1236165835443453952
1236164683599577088
1236164489839599616
1236164396830855168
1236164335488995328
1236161269415186432
1236161228243963904
1236160421272285184
1236159991381450752
1236157548698439680
1236153268784398336
1236152989041274880
1236150318582423552
1236149229636157440
1236148750860550144
1236147477188718592
1236143640591941632
1236141666974814208
1236141657977794560
1236140413427175424
1236139607571525632
1236139510058168320
1236136518525345792
1236135792990474240
1236134862245048320
1236133752067289088
1236133605484593152
1236131960285622272
1236129630341468160
1236128843527680000
1236127065381818368
1236126003480514560
1236125534842585088
1236125256999473152
1236124724570316800
1236121650447278080
1236120466172989440
1236120402600103936
1236120161041690624
1236115578995253248
1236114641433931776
1236114332158578688
1236114194828857344
1236111955938750464
1236111818701049856
1236111086895550464
1236106409365946368
1236106108089090048
1236105261515001856
1236101457515970560
1236101167693942784
1236101092477464576
1236100181642432512
1236097226704855040
1236096343812247552
1236095711541899264
1236095603706232832
1236095279071465472
1236094865588576256
1236093097790050304
1236090412575514624
1236089636339863552
1236088803145715712
1236088113027407872
1236087432023601152
1236087298208362496
1236086662817431552
1236086064294420480
1236085304135741440
1236084278838153216
1236082286908649472
1236081950173081600
1236081770769997824
1236081112381706240
1236080157649182720
1236080148216188928
1236080135478087680
1236079315965685760
1236078494674595840
1236077722176229376
1236077594786881536
1236077131110760448
1236077007051649024
1236076970682785792
1236075878209159168
1236075337471209472
1236074261187637248
1236074078865199104
1236073758634491904
1236073334955270144
1236072069814575104
1236071597309661184
1236071169142349824
1236071108924903424
1236071078943997952
1236070951227441152
1236068941543469056
1236068572377595904
1236065412632080384
1236065290569625600
1236065044296880128
1236064674187227136
1236064226873085952
1236062876286308352
1236062786397986816
1236061817086119936
1236061787344297984
1236061575800385536
1236061471601287168
1236061212267417600
1236060763401437184
1236060733869305856
1236060403672788992
1236059784895488000
1236059765698162688
1236059220346368000
1236058876597776384
1236058866913136640
1236058486984912896
1236058372475990016
1236058367719661568
1236058293111529472
1236058237503447040
1236058044733194240
1236057983710367744
1236057737299140608
1236057052251734016
1236057046019182592
1236057009709092864
1236056999244238848
1236056982349586432
1236056958299447296
1236056754523451392
1236056726060687360
1236056637410029568
1236056475039981568
1236056426822479872
1236055467308261376
1236055270599651328
1236055044644130816
1236054556297093120
1236054388575293440
1236054150338801664
1236054008168689664
1236053742878961664
1236053671688822784
1236053456240197632
1236053374778384384
1236053047970877440
1236052778600083456
1236052498705678336
1236052434654355456
1236052100888637440
1236051702098333696
1236051571777003520
1236051566349684736
1236051431804858368
1236050918833106944
1236050915678998528
1236050736179482624
1236050443282849792
1236049729785483264
1236049705957801984
1236049665587646464
1236049432782790656
1236049055249121280
1236048915050434560
1236048873262628864
1236048808120893440
1236048671856181248
1236048198105542656
1236047661620514816
1236047151483977728
1236046956037894144
1236046884403400704
1236046775057698816
1236046432194441216
1236045979649966080
1236045080173187072
1236044863898038272
1236044770809544704
1236044506384019456
1236044375488114688
1236044236560248832
1236043628373520384
1236043622669262848
1236043502242402304
1236042739952824320
1236042626371026944
1236042525435191296
1236042399920672768
1236042169359773696
1236042158941052928
1236042143476731904
1236041911439368192
1236041894842560512
1236041586707963904
1236041557301776384
1236041430231142400
1236041248542199808
1236040716062781440
1236040608441077760
1236040233029902336
1236039154984681472
1236038483891765248
1236037182210453504
1236037135137988608
1236036642076594176
1236036447209172992
1236035606032965632
1236035538878160896
1236034595986042880
1236034589212192768
1236033095947689984
1236032555587112960
1236032555423608832
1236032555293405184
1236032131765329920
1236031930212192256
1236031497984970752
1236029493883568128
1236029350366998528
1236029036721299456
1236028277225119744
1236028213769441280
1236028113118732288
1236028080071872512
1236027924819701760
1236027874349641728
1236026875656499200
1236026355336335360
1236025755487911936
1236025653696159744
1236024741745643520
1236022889364811776
1236021332334145536
1236021036119977984
1236020642643939328
1236020220868857856
1236020184231694336
1236020108545253376
1236019437729431552
1236019128177242112
1236018666958999552
1236018245544615936
1236017612493996032
1236017595830190080
1236016805484933120
1236016701029875712
1236016158710657024
1236016088334209024
1236016026141315072
1236015744669880320
1236015250203463680
1236015086193475584
1236014939459985408
1236013714035208192
1236013690245099520
1236013003218264064
1236012711533740032
1236012110095757312
1236011940247461888
1236011337337225216
1236011165374984192
1236010689325654016
1236010056149135360
1236007416094957568
1236007404250132480
1236006239286341632
1236005873933316096
1236005670446600192
1236004787256283136
1236004391720816640
1236004132978376704
1236003478364983296
1236002907662815232
1236002175299485696
1236001853013295104
1236001098101596160
1236000229448654848
1236000209374715904
1236000177783267328
1235999854523908096
1235999839889973248
1235998393052344320
1235997914884968448
1235997419919126528
1235997278332170240
1235997071720628224
1235996906318413824
1235996160906735616
1235996078081622016
1235995597565501440
1235995480234041344
1235995309949554688
1235994798902964224
1235994757836439552
1235994674403237888
1235994519058989056
1235994483197726720
1235993493476122624
1235993317931769856
1235992541780049920
1235992290243555328
1235991296470220800
1235990883708866560
1235990319033966592
1235989860323938304
1235989368508121088
1235988533103521792
1235988519790788608
1235987784722264064
1235987529263804416
1235986942480855040
1235986576649392128
1235986054882242560
1235986053439410176
1235985929854124032
1235985436184625152
1235985280156479488
1235985065513017344
1235984863146266624
1235984606475714560
1235984015787724800
1235983806538145792
1235983517168873472
1235983501360615424
1235983004016750592
1235982791424307200
1235982776651919360
1235982687216840704
1235982492936605696
1235981945420394496
1235981504343429120
1235980821959454720
1235979429618184192
1235977618022895616
1235977160092876800
1235976509245906944
1235976463293300736
1235976399493701632
1235975968944197632
1235975317111689216
1235975177298513920
1235974940807045120
1235974495070048256
1235974408013000704
1235974334226759680
1235973919321894912
1235972547675643904
1235972294398193664
1235972289633583104
1235971927774126080
1235971742662889472
1235971265531437056
1235971157368672256
1235971016641437696
1235970401530007552
1235970056355491840
1235969850041700352
1235969704487006208
1235969445090254848
1235968700425138176
1235967059923791872
1235966888259317760
1235966771951173632
1235966727869120512
1235965868351221760
1235965866971467776
1235963950832979968
1235963236190576640
1235962835865387008
1235962833353019392
1235962827996893184
1235962825362857984
1235962149169778688
1235962107029417984
1235961901177286656
1235960875879673856
1235960443874816000
1235960324932632576
1235959458670342144
1235959337505480704
1235959111851880448
1235958318612574208
1235958318167924736
1235956274300362752
1235956037087358976
1235955731242811392
1235955164193992704
1235954409479303168
1235954395600367616
1235954351933239296
1235954270459092992
1235953839196401664
1235952347806916608
1235952262167621632
1235952062761971712
1235950002255654912
1235949876845912064
1235948533812879360
1235948427730726912
1235947457550446592
1235947231729119232
1235947219305615360
1235946502347988992
1235946084108849152
1235945381478797312
1235945220426149888
1235944499123126272
1235944175381561344
1235943280828985344
1235943218547695616
1235940916822716416
1235940202180481024
1235939784389869568
1235939557096513536
1235939474930102272
1235939242238447616
1235938823965560832
1235938686900019200
1235938134552166400
1235937732612014080
1235936993605046272
1235935878201118720
1235935789340446720
1235935478823649280
1235935228000112640
1235934860201476096
1235934518948827136
1235934426967793664
1235934426686767104
1235934166186749952
1235934164836405248
1235933616628289536
1235933263354408960
1235932988803813376
1235932911712350208
1235932796700459008
1235932509105516544
1235932395586625536
1235930506711179264
1235929764768165888
1235929458311172096
1235929398966128640
1235929361850621952
1235928917271330816
1235928519059951616
1235928117304160256
1235927615812374528
1235927539954200576
1235926532402659328
1235926460092776448
1235926110300524544
1235925478025854976
1235925258223390720
1235925162975006720
1235924947429502976
1235924917172002816
1235924856488722432
1235924745893408768
1235924653513879552
1235924577131298816
1235924464338112512
1235924261933637632
1235924199576948736
1235924081276596224
1235923926200578048
1235923728082432000
1235923453653528576
1235923355594866688
1235922525030428672
1235922499990413312
1235922417324875776
1235922198436737024
1235921936313704448
1235921843275665408
1235921322628321280
1235920893962002432
1235920635781623808
1235920487726944256
1235920128191213568
1235920020527607808
1235919371333181440
1235919244803465216
1235918606887792640
1235918344190115840
1235918136819490816
1235917856501530624
1235917617300484096
1235917605678039040
1235916688287100928
1235916679542079488
1235916049947586560
1235915864941252608
1235915548246134784
1235914828931371008
1235913916128976896
1235913817089093632
1235913701049450496
1235913383494459392
1235913200622804992
1235912723768188928
1235912443660046336
1235912192895135744
1235911769865895936
1235911383503507456
1235910932825587712
1235910896687263744
1235910515874041856
1235910342531788800
1235910323858821120
1235910238546595840
1235909995755159552
1235909940218335232
1235909099419832320
1235909028468920320
1235908799682277376
1235908125716287488
1235907865086496768
1235907557161603072
1235907450659835904
1235906540080635904
1235906493414662144
1235906250233319424
1235906087364235264
1235904854876246016
1235904133183438848
1235904095375908864
1235903293282545664
1235903254485180416
1235903211275464704
1235902915274997760
1235902575003697152
1235902340387004416
1235901485570871296
1235901379429969920
1235901235045249024
1235901027473383424
1235900901824638976
1235900878411923456
1235900697004081152
1235900627814887424
1235900090994380800
1235899935167352832
1235899503649214464
1235899110747758592
1235898758707253248
1235898708539080704
1235895938981474304
1235895061277298688
1235895013172817920
1235894987449159680
1235893743460462592
1235892394526232576
1235892186992041984
1235892135725019136
1235891560862138368
1235890942437208064
1235890933855596544
1235890732675682304
1235889579695144960
1235889538314260480
1235889394982301696
1235888947907215360
1235888846010802176
1235888739341066240
1235888626686234624
1235888328937009152
1235887867366424576
1235887781651587072
1235885992235671552
1235885725851070464
1235885122030886912
1235884921689948160
1235884595360313344
1235884193760108544
1235883874913316864
1235883222724034560
1235883041928744960
1235879700767088640
1235879213800001536
1235878378311421952
1235877838936473600
1235877541602373632
1235877356134379520
1235876637113282560
1235874021444661248
1235873946743885824
1235873257904959488
1235873142809092096
1235872389528817664
1235872043066933248
1235872032077668352
1235871586072190976
1235870846364700672
1235870354427412480
1235870264174366720
1235870152731824128
1235869976583491584
1235868874827894784
1235868748596170752
1235868396559798272
1235868252695228416
1235867976781316096
1235867810451996672
1235867746111385600
1235867553785765888
1235867247974838272
1235867066982260736
1235867036745469952
1235866731945455616
1235866043588816896
1235865990535057408
1235865663765229568
1235864997151952896
1235864799164039168
1235864525615685632
1235864464286560256
1235864281112956928
1235864100728528896
1235863944306331648
1235863766060765184
1235863642442092544
1235863208902049792
1235862716432015360
1235862585179684864
1235862508587507712
1235862319084625920
1235862288650788864
1235862187064754176
1235862151438282752
1235862016033619968
1235861693067976704
1235861476084072448
1235860939695476736
1235859501686730752
1235858695197609984
1235858504713261056
1235858309799796736
1235858298236067840
1235858295509774336
1235858189054181376
1235858039556595712
1235858022657708032
1235857663314952192
1235857652925607936
1235857157276315648
1235856996051464192
1235856935368323072
1235856413252931584
1235856394538176512
1235856068632170496
1235855277427011584
1235854593902301184
1235854327853412352
1235852724626796544
1235852538018017280
1235851491232997376
1235851262362390528
1235850899525787648
1235850869695844352
1235850627869114368
1235850263707021312
1235850252977991680
1235850240390922240
1235850124938473472
1235850000350904320
1235849516114305024
1235849095001944064
1235848844757237760
1235848640112910336
1235848401771585536
1235847884781711360
1235847641256218624
1235847448347566080
1235847442714652672
1235847434879655936
1235846690583670784
1235844790022856704
1235844367870353408
1235844352938618880
1235843377972707328
1235843335211737088
1235843239766183936
1235843080596541440
1235843059427901440
1235841990635352064
1235841645142085632
1235841478535950336
1235840811054452736
1235838156563345408
1235837845819887616
1235837759010430976
1235837578122686464
1235835983465046016
1235835471818665984
1235834889900974080
1235834496928251904
1235834162231181312
1235833936879616000
1235833829937442816
1235833505256374272
1235833438130728960
1235833356295655424
1235831555206942720
1235830846931652608
1235830452067241984
1235830160718303232
1235829989880127488
1235829986214309888
1235829851258408960
1235829625302835200
1235829582739062784
1235829243830874112
1235828307981029376
1235827961586049024
1235827290635776000
1235827257240743936
1235826777970233344
1235826751671959552
1235826377510674432
1235826216269017088
1235826010479714304
1235825438074613760
1235825085161689088
1235824604402159616
1235824396117237760
1235823881560010752
1235822997228806144
1235822420654780416
1235822016990601216
1235821714035994624
1235820553555996672
1235819991187910656
1235819929854590976
1235819225983287296
1235818975834996736
1235818432114778112
1235818221602656256
1235817004121993216
1235816099364483072
1235815824528519168
1235814352000667648
1235813889930977280
1235810310553911296
1235808579732398080
1235806841772208128
1235804549203415040
1235803902924091392
1235803397132931072
1235803018752225280
1235802658788634624
1235801118032056320
1235799944616914944
1235799567586807808
1235798887446630400
1235798424194142208
1235795256420909056
1235794757760278528
1235793383173443584
1235793192521474048
1235787819211202560
1235784551269650432
1235783986745663488
1235783634449244160
1235783387664781312
1235783299504762880
1235782958214242304
1235782875351576576
1235782418767978496
1235782031520534528
1235781776464842752
1235781611645435904
1235781559367712768
1235781443030257664
1235780045811200000
1235779408637693952
1235778080834310144
1235778020612464640
1235776188653674496
1235773244239683584
1235772380317917184
1235772340908236800
1235770675702489088
1235770344109207552
1235768836072357888
1235764924229574656
1235764399861792768
1235760515223302144
1235758199694930176
1235757882202664960
1235757462638096384
1235757370652782592
1235756647995211776
1235755310121234432
1235755238805712896
1235754746222227456
1235754625975738368
1235753848662196224
1235752846353547264
1235752601100091392
1235750557601722368
1235749341807046656
1235747062198595584
1235746436123222016
1235745641462026240
1235742469834313728
1235739998655143936
1235739977629052928
1235739566947979264
1235739049723387904
1235738842151432192
1235737498183020544
1235736598618267648
1235736148925808640
1235736097797226496
1235736001194016768
1235733912418050048
1235732406231019520
1235732091683340288
1235731464034979840
1235731332896108544
1235729178676416512
1235728821455740928
1235727539869544448
1235726790506590208
1235725744350720000
1235724753496915968
1235723618207887360
1235721254016958464
1235719668561833984
1235718766471888896
1235717681799561216
1235717503403331584
1235716480676720640
1235715394805149696
1235712409844756480
1235712161147523072
1235711651069825024
1235711379014852608
1235711263868465152
1235710110305062912
1235709174912294912
1235707583215947776
1235707153643720704
1235706103515643904
1235703665677070336
1235703375603224576
1235703237082107904
1235703208397303808
1235700133498679296
1235700075227160576
1235699535793487872
1235697849884696576
1235697761502121984
1235697607957032960
1235697416600530944
1235696730118803456
1235696591853547520
1235695796479119360
1235695775302045696
1235695553876353024
1235695550688718848
1235694959979909120
1235694579518550016
1235693720386834432
1235692466327695360
1235691353616470016
1235691255046127616
1235691152482816000
1235691116445536256
1235691078491213824
1235691043661721600
1235691041258233856
1235691036095193088
1235689613609652224
1235689032027459584
1235688373685272576
1235688123981389824
1235688074417451008
1235687768732266496
1235687289906315264
1235686942836240384
1235686781623779328
1235686777198751744
1235686602812395520
1235686502417362944
1235684700691279872
1235684475658539008
1235684178286514176
1235683664001814528
1235683622062927872
1235683551032406016
1235683350700056576
1235682925808463872
1235682813015240704
1235682787002368000
1235681520620367872
1235681117526781952
1235680735211786240
1235680377714294784
1235680171677454336
1235679227103473664
1235678655063289856
1235678034658643968
1235676962317889536
1235676028879736832
1235675547461718016
1235675482215116800
1235674682319347712
1235674318471925760
1235673829340569600
1235673698247602176
1235673187385520128
1235672927795679232
1235671687107993600
1235671477103423488
1235671428810158080
1235671369506910208
1235671309419347968
1235671232185593856
1235669951677190144
1235669822693928960
1235669546410708992
1235669370237382656
1235668885275369472
1235668735408693248
1235668242389233664
1235667906266099712
1235667658860883968
1235667050414190592
1235666991572086784
1235666974795067392
1235666668044484608
1235666286820159488
1235665889506148352
1235665155482177536
1235664934890909696
1235664626798473216
1235664143786655744
1235664127848255488
1235663523478466560
1235663166589321216
1235662997453864960
1235662518879694848
1235662366768943104
1235661359431335936
1235661359347404800
1235661312493043712
1235660724900253696
1235660370582401024
1235660244501450752
1235660141959057408
1235660116499652608
1235660108602003456
1235660101140135936
1235659188266823680
1235658642990473216
1235658591211794432
1235658484382724096
1235658170095120384
1235657986187464704
1235657377988427776
1235657361362161664
1235657218013286400
1235656634765991936
1235656432474656768
1235656326723719168
1235655527100801024
1235655301581262848
1235654955480084480
1235654851410919424
1235654743202152448
1235654407498297344
1235654110717894656
1235653482805370880
1235653411200212992
1235653158321278976
1235653087760707584
1235653031850577920
1235652871124930560
1235652803131031552
1235652634314489856
1235652469600014336
1235651953570521088
1235650946358599680
1235650684017455104
1235650659430563840
1235650101080662016
1235649901532340224
1235649796205088768
1235649603191492608
1235649573353381888
1235649297338822656
1235649028261625856
1235648952852246528
1235648814482153472
1235648777760829440
1235648452794568704
1235648428312428544
1235648409400467456
1235648249567924224
1235648094252830720
1235647918641541120
1235647901730299904
1235647771014828032
1235647542551027712
1235647509483212800
1235647140145385472
1235646882757697536
1235646652343635968
1235646471791394816
1235645848102612992
1235645805106626560
1235645796969672704
1235645758105243648
1235645517461417984
1235645027403075584
1235644596593602560
1235644445854502912
1235644358352924672
1235644268636749824
1235644258390028288
1235644161191284736
1235643900750180352
1235643743547674624
1235643743425961984
1235643530040705024
1235643473962901504
1235643212418756608
1235642911565508608
1235642771274379264
1235642485629751296
1235642337461596160
1235642306432131072
1235642131320102912
1235642123271233536
1235642001963409408
1235641921441316864
1235641760803667968
1235641730462093312
1235641652515164160
1235641583053107200
1235641357558902784
1235641260750356480
1235641253112483840
1235641226797301760
1235640972819812352
1235640753537368064
1235640357599100928
1235640186400276480
1235639968523042816
1235639741892067328
1235639677748744192
1235639566226292736
1235639506365059072
1235639470730481664
1235639381517533184
1235639230199562240
1235639199992352768
1235639186063077376
1235639097953120256
1235639040747220992
1235638495986601984
1235638463782940672
1235638249512742912
1235637955244539904
1235637710523699200
1235637527295361024
1235637502486052864
1235637451953143808
1235636992119054336
1235636912339275776
1235636508385619968
1235636347651543040
1235634950122201088
1235634397010726912
1235634260020613120
1235633747321475072
1235632808682549248
1235631833947271168
1235631804377370624
1235631663914405888
1235631062526513152
1235630962710474752
1235630692853309440
1235630408743567360
1235630405644058624
1235630394063503360
1235630320315228160
1235630171123638272
1235630108230238208
1235630058401927168
1235629902394613760
1235628337483198464
1235628220969390080
1235628140728377344
1235627873039458304
1235627849068851200
1235627190278148096
1235626713473744896
1235626379426791424
1235626302079741952
1235625971539050496
1235625723328712704
1235625623906922496
1235625456650592256
1235624894269763584
1235624796702101504
1235623328683118592
1235623200601620480
1235622898427191296
1235622756584173568
1235622207101054976
1235622100792217600
1235621134630084608
1235620596492296192
1235620223606235136
1235620090386829312
1235620059327926272
1235619914859212800
1235619391179501568
1235618213137874944
1235617833632944128
1235617631815766016
1235617044483190784
1235615999803654144
1235615832325140480
1235615426807242752
1235615140164382720
1235614847477391360
1235614839101251584
1235614802665279488
1235614802610761728
1235614299411935232
1235614281170903040
1235614196919910400
1235614040405225472
1235613632999931904
1235613159907442688
1235613102386880512
1235612743883018240
1235612051277479936
1235611640005111808
1235611560359473152
1235611539249471488
1235611309296586752
1235610615131054080
1235610382334492672
1235610283810246656
1235610157641371648
1235609546795757568
1235608952404140032
1235608482570743808
1235608448244514816
1235608149127725056
1235607253325135872
1235606612007514112
1235606106828763136
1235606006287208448
1235605838389182464
1235605817610682368
1235605360528052224
1235605337790656512
1235604942850793472
1235603841124622336
1235602730204487680
1235602196726571008
1235601714587340800
1235601697579417600
1235601502326185984
1235600982433644544
1235600709074251776
1235600667093413888
1235600350477979648
1235600216520192000
1235599742324764672
1235599249284329472
1235599215075586048
1235598444976148480
1235597941659729920
1235597213532856320
1235596976122716160
1235596564149596160
1235596498345197568
1235595972589346816
1235595117685170176
1235595007198932992
1235594787694292992
1235594745503760384
1235594735672320000
1235594653472182272
1235594047437209600
1235593411937234944
1235593373991358464
1235592538960117760
1235592477131694080
1235592298718572544
1235592247195979776
1235591850955685888
1235591217938927616
1235590528487559168
1235590223544934400
1235588887583641600
1235588771229425664
1235588561417785344
1235588181627727872
1235588050123722752
1235587980988948480
1235587777070170112
1235587598883536896
1235587298697375744
1235586506351353856
1235586356061052928
1235585884478730240
1235585759580651520
1235584992283111424
1235584857238933504
1235584527206174720
1235583845287817216
1235583481989619712
1235583481947648000
1235583264221519872
1235583129525469184
1235582980468375552
1235582862621016064
1235582563114237952
1235582414279172096
1235582245722894336
1235582241872412672
1235582155209703424
1235581872404598784
1235581831837298688
1235581157229694976
1235580918859018240
1235580424782479360
1235580106950746112
1235579846165594112
1235579547342581760
1235579455612932096
1235579390366531584
1235578860982411264
1235578823338422272
1235578281081987072
1235578166611083264
1235578139193073664
1235577925140762624
1235577871055368192
1235577529865510912
1235577054055346176
1235575538691067904
1235575515802750976
1235574915870396416
1235574181011394560
1235573831684636672
1235573322634735616
1235572001047117824
1235571557659000832
1235571318990475264
1235571079701295104
1235570264798199808
1235570216819556352
1235570135857053696
1235569401849577472
1235568644941164544
1235568177909653504
1235567775759949824
1235567596747067392
1235567299827990528
1235567000908214272
1235566783555231744
1235566777612066816
1235566630941282304
1235566409305878528
1235565808195006464
1235565365087830016
1235565177279520768
1235565056953212928
1235564951885889536
1235564674277609472
1235564082591195136
1235564063268073472
1235563519870824448
1235563153720782848
1235563098372624384
1235562824564236288
1235562789772709888
1235562536319107072
1235562328780943360
1235562158991314944
1235561420235759616
1235561373754626048
1235560927170310144
1235560884354736128
1235560758546550784
1235560510067601408
1235560167837704192
1235559811460128768
1235559338724360192
1235558956451291136
1235558568390266880
1235557923419344896
1235557886719229952
1235557803781173248
1235557765667487744
1235557585861758976
1235557209796481024
1235557038224179200
1235556166387654656
1235555984489226240
1235555872027394048
1235555680741994496
1235555661058117632
1235555463086985216
1235554885636153344
1235554636485898240
1235554156158607360
1235554111774502912
1235553905335025664
1235553743757807616
1235553733095723008
1235553512156774400
1235553406607077376
1235553349308690432
1235553287212068864
1235552886496677888
1235552545990467584
1235552276669857792
1235552244554067968
1235552217567985664
1235552082423205888
1235552004199583744
1235551883063889920
1235551599595929600
1235551485481693184
1235551293579481088
1235550893010857984
1235550752858234880
1235550643802144768
1235550641381969920
1235550270957944832
1235550126497828864
1235547776903151616
1235547743667580928
1235547149267595264
1235546874205134848
1235546351687122944
1235545104812630016
1235544218019328000
1235544202827661312
1235544126247952384
1235544112599691264
1235543874728161280
1235543719039733760
1235543222937505792
1235542019352616960
1235541661037531136
1235541523359510528
1235541277459939328
1235540867387187200
1235539817162854400
1235539745637199872
1235539318849941504
1235538560075235328
1235538262502117376
1235537795399081984
1235537015132819456
1235536577553747968
1235536522381836288
1235535921069490176
1235535534933651456
1235535298773254144
1235534912955936768
1235534758878343168
1235534583199916032
1235534283684507648
1235534278517288960
1235534036975661056
1235533465203822592
1235533381011673088
1235532768119005184
1235532222217650176
1235531765961248768
1235531062090043392
1235530835610218496
1235530803230228480
1235530499231223808
1235530497310093312
1235530384131198976
1235529109834313728
1235528980926574592
1235528977378357248
1235528854359416832
1235528258919096320
1235527988898217984
1235527896476729344
1235527581832638464
1235526183799816192
1235525953037701120
1235525565093904384
1235525492591087616
1235524688920449024
1235524227790327808
1235524205833318400
1235524197641830400
1235524172127838208
1235523871949848576
1235523836248027136
1235523719151435776
1235523083903123456
1235523024541138944
1235521737233702912
1235521369191964672
1235521344076476416
1235520377838854144
1235518976823824384
1235518889003495424
1235518805637554176
1235518324961947648
1235518264228417536
1235517641554567168
1235517554581336064
1235516754270375936
1235516665573621760
1235516087984414720
1235515950327308288
1235515823164395520
1235515661033463808
1235515177451347968
1235515155104006144
1235514690001829888
1235513897995517952
1235513637990805504
1235513254736203776
1235512996606197760
1235512583722905600
1235511125309116416
1235510503230693376
1235510340240039936
1235510169821462528
1235509829650825216
1235509534426357760
1235509336287383552
1235509206611947520
1235509168229896192
1235509166095110144
1235509133035487232
1235508996385234944
1235508605408940032
1235508580448645120
1235508573272039424
1235507348610985984
1235507251823038464
1235506833181138944
1235506102374215680
1235506100058890240
1235506040415936512
1235505594196324352
1235505482707668992
1235505085301563392
1235505073574359040
1235504876710277120
1235504601333460992
1235504455824613376
1235503908468019200
1235503866948526080
1235503501817634816
1235503411266809856
1235503371269877760
1235503338432663552
1235503060056567808
1235503055891648512
1235502814761070592
1235502789972742144
1235502109250007040
1235502011451310080
1235501681544237056
1235501609771077632
1235501342023716864
1235501317646245888
1235501307810770944
1235501237996417024
1235500875298287616
1235499778127036416
1235498831560601600
1235498391494365184
1235498347475202048
1235497782812667904
1235497668954058752
1235497661949775872
1235497041842720768
1235495248115175424
1235494973660938240
1235494925292232704
1235494651911528448
1235494042605142016
1235493886807527424
1235493448431661056
1235492366775173120
1235491903518408704
1235491751084711936
1235490833908011008
1235490388246294528
1235490084985671680
1235488868897447936
1235488595340865536
1235487979302522880
1235487934301814784
1235487740801634304
1235487715254247424
1235487507241975808
1235486008809947136
1235485725031874560
1235483901784657920
1235483815247859712
1235483652139757568
1235483430848061440
1235482682701668352
1235482177531449344
1235481934928715776
1235481504505085952
1235481411194212352
1235480942975778816
1235480481258278912
1235480474023153664
1235480235921076224
1235479904743034880
1235477753618550784
1235476118876061696
1235474923247644672
1235471969132437504
1235471354893393920
1235471134977482752
1235469803315507200
1235469794348085248
1235468291835080704
1235466031939719168
1235463886377226240
1235463470587338752
1235463346184269824
1235462334497329152
1235461350668644352
1235461273225027584
1235460981217579008
1235460536843882496
1235460267317833728
1235456257793781760
1235455732583186432
1235454223120293888
1235454136126144512
1235453238180184064
1235450360400982016
1235450336783065088
1235450149322854400
1235450039004205056
1235449474413137920
1235448865320579072
1235447502410838016
1235446671133364224
1235444850578690048
1235444610454839296
1235444560135892992
1235442229382021120
1235441838024163328
1235441661712494592
1235441607643561984
1235441424394403840
1235439912482029568
1235439900012339200
1235438552407736320
1235437270078869504
1235436835892944896
1235435469225299968
1235433105390886912
1235433013971955712
1235431902481432576
1235431865894367232
1235431304428044288
1235428927943786496
1235428840349949952
1235427691538591744
1235423721168334848
1235422312058372096
1235422284401307648
1235422019879137280
1235421819492077568
1235421652923674624
1235419954712678400
1235419950581288960
1235418509271695360
1235418041091006464
1235417883217457152
1235416959275036672
1235415782097485824
1235414569238945792
1235413992148885504
1235413324222742528
1235413182488797184
1235412560201080832
1235411533485813760
1235411481291665408
1235411317114064896
1235410587082821632
1235409030396276736
1235407077205356544
1235407059706773504
1235406246238457856
1235405247964540928
1235404680634589184
1235404229138763776
1235398894244126720
1235398168537427968
1235397792643702784
1235397708875169792
1235397128844791808
1235396965342408704
1235395397041840128
1235394738859077632
1235392597348118528
1235392089590042624
1235391962703896576
1235389394757881856
1235388973188407296
1235387827845771264
1235387067103956992
1235386815944757248
1235386496347238400
1235386288112414720
1235384745959317504
1235384545639378944
1235384535270842368
1235383788907061248
1235383164794597376
1235381374917447680
1235380821709606912
1235380516485988352
1235380036451987456
1235379650727157760
1235377106693099520
1235376827389972480
1235376357917458432
1235373878739898368
1235373757033742336
1235372447932837888
1235372371831226368
1235370157565816832
1235369190720225280
1235369052362510336
1235367985826516992
1235365546633261056
1235365251371024384
1235364425017839616
1235363785218469888
1235363519689785344
1235362414155177984
1235362409147138048
1235361919646695424
1235360341124579328
1235359477261623296
1235359285032423424
1235358899345203200
1235358881057918976
1235358715131211776
1235356108782354432
1235355807144800256
1235354586686394368
1235351130638516224
1235350300883447808
1235350196583895040
1235349544600125440
1235349303184457728
1235348483244081152
1235348041965752320
1235347132305072128
1235346916348694528
1235346549703684096
1235346459874258944
1235346048618549248
1235344306912800768
1235344117644881920
1235343689586704384
1235341627524354048
1235340388162035712
1235339247915159552
1235339238767554560
1235338973058301952
1235337010644160512
1235334144755937280
1235334053043351552
1235333944444362752
1235333371410223104
1235332986738020352
1235331325864927232
1235330688372674560
1235330487004139520
1235330359920857088
1235330214219190272
1235329979065536512
1235329947696320512
1235329284790681600
1235329214104117248
1235329178246971392
1235327842453516288
1235327532930682880
1235326946713751552
1235326868372549632
1235326642031071232
1235325244627439616
1235325183503806464
1235325164621090816
1235325037076504576
1235324732674891776
1235324230469857280
1235324053805830144
1235323468046102528
1235323163111837696
1235322879010582528
1235322463673872384
1235322403393335296
1235322093442682880
1235321694040002560
1235321504012869632
1235321021978333184
1235320865790791680
1235320708407980032
1235320493508562944
1235320363057164288
1235320342958268416
1235319895388233728
1235319743185399808
1235319606153224192
1235319468013871104
1235319435801567232
1235318025731047424
1235317915869736960
1235317371449102336
1235317045790674944
1235315115370704896
1235314826697674752
1235314715083124736
1235314342008164352
1235314227533012992
1235314026550358016
1235313238298054656
1235312561051930624
1235311917889179648
1235311687579906048
1235311363620208640
1235311315201253376
1235311271374917632
1235311095688179712
1235311066164482048
1235310988431327232
1235310764786880512
1235309619469266944
1235309267105853440
1235309089435070464
1235308374797045760
1235307854254481408
1235307803042033664
1235307723530661888
1235307707374108672
1235307499462561792
1235307482421043200
1235307302154129408
1235307103893565440
1235306034081734656
1235305822898589696
1235305563766038528
1235305485370298368
1235305440969445376
1235305113364893696
1235304676930834432
1235304676771405824
1235304129528025088
1235303525867020288
1235303104746311680
1235302713476476928
1235302681566208000
1235302431157882880
1235302243282407424
1235302168409911296
1235302143206264832
1235301815853428736
1235301603294556160
1235301045531750400
1235300220554092544
1235299801681604608
1235299047814107136
1235299024128929792
1235298982928281600
1235298363119108096
1235298057660616704
1235297990455234560
1235297955915190272
1235297737236770816
1235297527961997312
1235297210008559616
1235296465792180224
1235295991248678912
1235295717381505024
1235295342687653888
1235294662748975104
1235294636530438144
1235294433727438848
1235294315695550464
1235294301103542272
1235294228382715904
1235293248446509056
1235293186479792128
1235292744408616960
1235292140961492992
1235291713213734912
1235291536067309568
1235291220194349056
1235291189970178048
1235291025423421440
1235290770019700736
1235290648691060736
1235290163619565568
1235288524414423040
1235288150198693888
1235288135304654848
1235287838146678784
1235287647020433408
1235287182920822784
1235287159701151744
1235287154500214784
1235286920718143488
1235286661132668928
1235286420606119936
1235286307343077376
1235286217698283520
1235286062609596416
1235286024433041408
1235285501185339392
1235285498668564480
1235285486618501120
1235285246628814848
1235284542577139712
1235284213735346176
1235283474178887680
1235282615730688000
1235282613792718848
1235281345485713408
1235281061627584512
1235280895743078400
1235280097445175296
1235279148979015680
1235278757323255808
1235277968424878080
1235277664354807808
1235277455264493568
1235276923972005888
1235276410316640256
1235275860963450880
1235275690578259968
1235275314487582720
1235273831750782976
1235273317671555072
1235272957435539456
1235271850428698624
1235271610816286720
1235271573470408704
1235271411654111232
1235271319391891456
1235270732453732352
1235269766287429632
1235268409337589760
1235268169687797760
1235268091136921600
1235266645721051136
1235265707253927936
1235265383461863424
1235265034487574528
1235264232343646208
1235263740125294592
1235262519566102528
1235261626326159360
1235261102436601856
1235260744792449024
1235259829666689024
1235258771380854784
1235257980096073728
1235257207437946880
1235255183069900800
1235253877680766976
1235253148152889344
1235252956225777664
1235250131735371776
1235249026204827648
1235248869686104064
1235248604195049472
1235248567213645824
1235248039822057472
1235247491702026240
1235247468306214912
1235247264723013632
1235247180463603712
1235246914444107776
1235246021921267712
1235245504377663488
1235244885562855424
1235244262054400000
1235243606715203584
1235242519207612416
1235242008178020352
1235241928817618944
1235241439019270144
1235241151357235200
1235240946880720896
1235240732937670656
1235240639773708288
1235240346113708032
1235240339386044416
1235240187086753792
1235240112474042368
1235239499610894336
1235238333124468736
1235237678951673856
1235237605853278208
1235237588841172992
1235236999088558080
1235236812047577088
1235235039614558208
1235234694691794944
1235234449002029056
1235234326029062144
1235233692727021568
1235230856823943168
1235230797818363904
1235230567962157056
1235230118378983424
1235229728283537408
1235229005516812288
1235228237896306688
1235227692196343808
1235227388486664192
1235227279048966144
1235225992408383488
1235224873196191744
1235223024275804160
1235222956277747712
1235222864372150272
1235222786630717440
1235222234014396416
1235221308151123968
1235221140064342016
1235220888154517504
1235220778632667136
1235220586097496064
1235220492484739072
1235220492115730432
1235219605695668224
1235219009244745728
1235218982187261952
1235218979767099392
1235218320267280384
1235217705529155584
1235216326857113600
1235215255015391232
1235214875133083648
1235214666202218496
1235214666172780544
1235214441706328064
1235214034862919680
1235213785712951296
1235213731556016128
1235213384041353216
1235212787468689408
1235211669942521856
1235211669242089472
1235210991727792128
1235210989198553088
1235210530681319424
1235209929562001408
1235209897752567808
1235209614184058880
1235208667752009728
1235207971958861824
1235207900181590016
1235207829553909760
1235207133811089408
1235206612987478016
1235206559543812096
1235205986643779584
1235205925633495040
1235205830175272960
1235205452662804480
1235205281631678464
1235204662439051264
1235204375171264512
1235203783602229248
1235203488721899520
1235203228972662784
1235202083260784640
1235202010867265536
1235201338050523136
1235200951142711296
1235200638537125888
1235200343547531264
1235199741979324416
1235199195822395392
1235198729340231680
1235197743167148032
1235197700649431040
1235197622211825664
1235196577054175232
1235195952278966272
1235195870511017984
1235193769068302336
1235193239973527552
1235191538839248896
1235191439157583872
1235191294294667264
1235191061112410112
1235189363023192064
1235189270383480832
1235189023867629568
1235188770451918848
1235188338241335296
1235188245903872000
1235187621980037120
1235186548083232768
1235186371595247616
1235186160936382464
1235185962440970240
1235184752287780864
1235184484569489408
1235184359558217728
1235184254700711936
1235184045908250624
1235182634650800128
1235181825737265152
1235181449499815936
1235181195584892928
1235180977674162176
1235180693463982080
1235180293004328960
1235180058802872320
1235179479166832640
1235178537595932672
1235178498672623616
1235178377440526336
1235177397441499136
1235177320303951872
1235177111150829568
1235176946226597888
1235175659229589504
1235173151954407424
1235173119620296704
1235172828439367680
1235172435344977920
1235170299789836288
1235169718174191616
1235169640550039552
1235168746429440000
1235168477704523776
1235167718518685696
1235167634913726464
1235166873538441216
1235166799408353280
1235166415595999232
1235166372721807360
1235166095801077760
1235164370235052032
1235164178983374848
1235163609207988224
1235163603507892224
1235163545551003648
1235161981654573056
1235161838704308224
1235161817908826112
1235161817892126720
1235161405059485696
1235161400156315648
1235160595617460224
1235159594537639936
1235159358683508736
1235159127598518272
1235158078364020736
1235156914876616704
1235155547764199424
1235154753367060480
1235154695322140672
1235153701452599296
1235153576231604224
1235153132524638208
1235152169105534976
1235151866457182208
1235151751650607104
1235151725188845568
1235151291640356864
1235150683449331712
1235150549978251264
1235149978529656832
1235148388917747712
1235148336094535680
1235148250123882496
1235147900738572288
1235147739907805184
1235147607045025792
1235147507358978048
1235147496109854720
1235146969594712064
1235146552781484032
1235145136419606528
1235145011148267520
1235144470925959168
1235144178843054080
1235144089105862656
1235143625807466496
1235143530105970688
1235143266439438336
1235143096524042240
1235143024109379584
1235142911769092096
1235142906161184768
1235142761390714880
1235141852254400512
1235141070331064320
1235141001645371392
1235140633645527040
1235140346453073920
1235139885914370048
1235139479947575296
1235139471101661184
1235137823654764544
1235137655949623296
1235137155300823040
1235136582631350272
1235136185028182016
1235135928227762176
1235135754231308288
1235135655472222208
1235135543446556672
1235135374562910208
1235134602781446144
1235134498213330944
1235132810228162560
1235131598443401216
1235131480818372608
1235131465467387904
1235131406793269248
1235130366446493696
1235130356287844352
1235128770190880768
1235128738657865728
1235128737835798528
1235128362085101568
1235128358884773888
1235128169805553664
1235127896299180032
1235127704049127424
1235127417431363584
1235127396132585472
1235126727107633152
1235126609990094848
1235126216434298880
1235126087111364608
1235125885356961792
1235125061457195008
1235124825129136128
1235124755264466944
1235124599932817408
1235124490625077248
1235124277382443008
1235124205886140416
1235124119777181696
1235123995005067264
1235123489503313920
1235123105112129536
1235122578630508544
1235122549299843072
1235122468865507328
1235121768618049536
1235121694504673280
1235121329457606656
1235121325229789184
1235120670536691712
1235120453754093568
1235120142322827264
1235120047711911936
1235118908769632256
1235118604523147264
1235118582612156416
1235118047775449088
1235118040619970560
1235117778337746944
1235117255421116416
1235117050667945984
1235116626573266944
1235116519446712320
1235116286482378752
1235116169662812160
1235116094987304960
1235115296173756416
1235113022168788992
1235113016443584512
1235112705331060736
1235112400950415360
1235111163559469056
1235110862517485568
1235110731609071616
1235110404050706432
1235110195375812608
1235110147619340288
1235109757180162048
1235109542402215936
1235108969468874752
1235108451551825920
1235108274380238848
1235107885434023936
1235107853645430784
1235107216538996736
1235105315156197376
1235105195090227200
1235104035440599040
1235103582992490496
1235103281279430656
1235102656701423616
1235102551671861248
1235101448578273280
1235101176611213312
1235100528851300352
1235099673549066240
1235097402719244288
1235095883370434560
1235095811865772032
1235093809484070912
1235092755451281408
1235092566703345664
1235091098151694336
1235090849567891456
1235090824561438720
1235089659308519424
1235089614509158400
1235089224585687040
1235088110792237056
1235087651390144512
1235087359630172160
1235086681809682432
1235086386438582272
1235086324119592960
1235085343751168000
1235084236723494912
1235083746124034048
1235083418645311488
1235083084720037888
1235083045171900416
1235081753938800640
1235080752372387840
1235075175676129280
1235074996181094400
1235072332571402240
1235072330142863360
1235066457655918592
1235066075605168128
1235065582736859136
1235063789541666816
1235063147855114240
1235062513030451200
1235061577696432128
1235060616806535168
1235059900176166912
1235059382338998272
1235058918168002560
1235057205885493248
1235057124901662720
1235056328889884672
1235055894431334400
1235052386671968256
1235049840020619264
1235049582381477888
1235048715234062336
1235048480613249024
1235048098805628928
1235047852717387776
1235045072812396544
1235043611483312128
1235042280224043008
1235042100607102976
1235041974538760192
1235041631193010176
1235041061904347136
1235040788565770240
1235039816254803968
1235038274541895680
1235033432675123200
1235032710965374976
1235031538095423488
1235031485133910016
1235030918974164992
1235030410465177600
1235029719663300608
1235029235045036032
1235028437183557632
1235027297289170944
1235026891381166080
1235026744861581312
1235025112748789760
1235024614331277312
1235024555262894080
1235023666515070976
1235022385603985408
1235020879081267200
1235020331091361792
1235020188086489088
1235019768102453248
1235019144405209088
1235018466383368192
1235015368973996032
1235014456796524544
1235013447533973504
1235011853148762112
1235011784697757696
1235010458664476672
1235010086436626432
1235009555324686336
1235009445735919616
1235009321668239360
1235008511546806272
1235008231929348096
1235007363947442176
1235007294250700800
1235004924984881152
1235004658189348864
1235004084886867968
1235002373631664128
1235000788461719552
1235000228513628160
1235000111186341888
1234998783303245824
1234998636209041408
1234996314498158592
1234996119899275264
1234995380409913344
1234995350349340672
1234994708138430464
1234994090049015808
1234994064593829888
1234993495640641536
1234993410248830976
1234993119730388992
1234992878578876416
1234992552056512512
1234992452345319424
1234991184415576064
1234990907688022016
1234990657053192192
1234990251321389056
1234987477074472960
1234985980131594240
1234985816188837888
1234983824469028864
1234983776960122880
1234983096040083456
1234983078101053440
1234982735464189952
1234981554847272960
1234980015629975552
1234977090648211456
1234975322904248320
1234974696338161664
1234973074061066240
1234971746949681152
1234970109191450624
1234969357047955456
1234968262192115712
1234967894057979904
1234967801263251456
1234967739955077120
1234967590574993408
1234967503190855680
1234967452129382400
1234967139938951168
1234967034351349760
1234966782714241024
1234964786313478144
1234964568360804352
1234964282124767232
1234964151635763200
1234962259698442240
1234961959864414208
1234961653990612992
1234961090653642752
1234959791249920000
1234959141430493184
1234958182235213824
1234956724379045888
1234956504337387520
1234956484640821248
1234956341267124224
1234956314712956928
1234955440418697216
1234955027174825984
1234954753999695872
1234954150481399808
1234953047861874688
1234952708026773504
1234952674161750016
1234952469811208192
1234951456916168704
1234949747707805696
1234949174124335104
1234948066999816192
1234947773629222912
1234947123378106368
1234946653750095872
1234946651120271360
1234946067973566464
1234945963929718784
1234943541023035392
1234942921868238848
1234942579642376192
1234941601388036096
1234940610697744384
1234939634481868800
1234939574687879168
1234938806987558912
1234938455546900480
1234938219696926720
1234937974585884672
1234937841907462144
1234936691703586816
1234936474501615616
1234936080463302656
1234935905053478912
1234934683562938368
1234934260584341504
1234934135703121920
1234934010331172864
1234933999279079424
1234933123638390784
1234932838492975104
1234932831215853568
1234932809103372288
1234931654193483776
1234930820478984192
1234930617218928640
1234930407101079552
1234930256391196672
1234930162011033600
1234930134735622144
1234930052841734144
1234929507598991360
1234929250429480960
1234929034028388352
1234928669665067008
1234928637574631424
1234927921950752768
1234927780502081536
1234926053870706688
1234925658003922944
1234925510804877312
1234925405720600576
1234924793264209920
1234924780719087616
1234924123018727424
1234923601725448192
1234923287769223168
1234923245733728256
1234922302363635712
1234921741907922944
1234921678523817984
1234921484470095872
1234921484264460288
1234921466103242752
1234920337202012160
1234920084822315008
1234918566903844864
1234917755511431168
1234916781669658624
1234916531810848768
1234915869534367744
1234915379132162048
1234914446964862976
1234913401643716608
1234912955256446976
1234912885182226432
1234912649072259072
1234912608030986240
1234912506746937344
1234911921133895680
1234911266264645632
1234910487495823360
1234910294893195264
1234909291091501056
1234908810453622784
1234908576264704000
1234908483335737344
1234907680017281024
1234906888032018432
1234906874048282624
1234906528861347840
1234906359893778432
1234905908347461632
1234905502498402304
1234905413990146048
1234905264740032512
1234905103716552704
1234905089070026752
1234903339298631680
1234902610143936512
1234902494934900736
1234902412550443008
1234902371328765952
1234901983414411264
1234901354612695040
1234901289873629184
1234900061357735936
1234899738907987968
1234899686537879552
1234898771533815808
1234898509696028672
1234898427315658752
1234898322839744512
1234898284055007232
1234898096431042560
1234896811703382016
1234895958674153472
1234895932187201536
1234895417088802816
1234893802629935104
1234893802323750912
1234893430192529408
1234891392809414656
1234891293698019328
1234891104945868800
1234891001606610944
1234890924792016896
1234890491151319040
1234890177128075264
1234889725498068992
1234889610829979648
1234889206452887552
1234888842274054144
1234888653375246336
1234888460881756160
1234888078482763776
1234887899918688256
1234887758155599872
1234887754707865600
1234886870514982912
1234886730240622592
1234886704605081600
1234886655225606144
1234886408717901824
1234886252861644800
1234886152127160320
1234886038822227968
1234885695950524416
1234885434586681344
1234885007274983424
1234884799795429376
1234884606631010304
1234884374841024512
1234884230322311168
1234883634135552000
1234883255062716416
1234883207209705472
1234882367015153664
1234882292373499904
1234880898404880384
1234880831199547392
1234880115395452928
1234879511948414976
1234879368624734208
1234879340644421632
1234879065817067520
1234878935168626688
1234878889530445824
1234878867543859200
1234878401820995584
1234878224863301632
1234877524166856704
1234876978320281600
1234876841606778880
1234876300537597952
1234875297398480896
1234874819356905472
1234873444476604416
1234873245389725696
1234872689367691264
1234872197690339328
1234872183916318720
1234871977808211968
1234871941015703552
1234871601147076608
1234871550354055168
1234871419084738560
1234871402261512192
1234871229196230656
1234870974631288832
1234870939042508800
1234870493032992768
1234870461118472192
1234870355065483264
1234870184831324160
1234869999015084032
1234869523750301696
1234869251187539968
1234869042986524672
1234869025793961984
1234868825729982464
1234868383042195456
1234868310325501952
1234867786138054656
1234867646270754816
1234867377709281280
1234867271341834240
1234867243684651008
1234867230015475712
1234866771523334144
1234866737469968384
1234866724001996800
1234866262913748992
1234865733336797184
1234865650515968000
1234865518789767168
1234865241797910528
1234865230947201024
1234865178144980992
1234865050629877760
1234864726863159296
1234864609997336576
1234864365519679488
1234864248557359104
1234863021513748480
1234862780408311808
1234862290794680320
1234861757593722880
1234861503972593664
1234861392362188800
1234861010525270016
1234860724092112896
1234860706937352192
1234860582819385344
1234860580512714752
1234860373137854464
1234860117918650368
1234859945956401152
1234859939421728768
1234859880676253696
1234859766989672448
1234859672005378048
1234859671254683648
1234859482271879168
1234859434016477184
1234859157108465664
1234858947460370432
1234858689275793408
1234858679188455424
1234858607377776640
1234857917419003904
1234857576896045056
1234857563193147392
1234857448357404672
1234857332489756672
1234857221961461760
1234857105749925888
1234856987680223232
1234856867920318464
1234856863642128384
1234856840007225344
1234856819614527488
1234856656309235712
1234856642023432192
1234856181971259392
1234856152451682304
1234856060894224384
1234856047514472448
1234855611994693632
1234855604386136064
1234853865096384512
1234853120045408256
1234852971499966464
1234852354954010624
1234852305071202304
1234852135793238016
1234852120140099584
1234851953118777344
1234851646716489728
1234851524188286976
1234851265001246720
1234851162114883584
1234850840189509632
1234850770761273344
1234850446549889024
1234850375951360000
1234849636537511936
1234849071082270720
1234848432432521216
1234847648944967680
1234847127341346816
1234846716999929856
1234846622129020928
1234846578248122368
1234846125288542208
1234845930165358592
1234845830462361600
1234845548701765632
1234845377918066688
1234844951084765184
1234844490218631168
1234843719309942784
1234843524157169664
1234842853177688064
1234842823142367232
1234842480304173056
1234842348317704192
1234841924969943040
1234841595196968960
1234841221245415424
1234841115846750208
1234840722760699904
1234840547031994368
1234840198615191552
1234839891495784448
1234839864241262592
1234839754140737536
1234839729302122496
1234839718547734528
1234839581746507776
1234839554340933632
1234839158037925888
1234837601690976256
1234837203039215616
1234836306728849408
1234835817375334400
1234835604581515264
1234835604354912256
1234835430983360512
1234835178427518976
1234835131380256768
1234835089357508608
1234834920050171904
1234834674821799936
1234834133731487744
1234833928868876288
1234833878310883328
1234833518481440768
1234833404631248896
1234832611010400256
1234832066728120320
1234831958766735360
1234831091992797184
1234830887377752064
1234830338418991104
1234830207422541824
1234829845864927232
1234829122850959360
1234829090231914496
1234828184056664064
1234828094399270912
1234828082621689856
1234827974261624832
1234827742295678976
1234826302303035392
1234825999663144960
1234825996114812928
1234825977877979136
1234825953660067840
1234825602374369280
1234825350669987840
1234825157648187392
1234825122617470976
1234825081404002304
1234824964974333952
1234824865011519488
1234824819385831424
1234824380833828864
1234824297685798912
1234823623472558080
1234823569043021824
1234823337697665024
1234822696040640512
1234822668165222400
1234822591669579776
1234822461159608320
1234821827483983872
1234821382615248896
1234821143321862144
1234820719575474176
1234820442856329216
1234820275125936128
1234819782207254528
1234819592427581440
1234819115518480384
1234818792729063424
1234818428726206464
1234817046019362816
1234816637892747264
1234816502907490304
1234816479922663424
1234816105836896256
1234815769671819264
1234814877258178560
1234813653754535936
1234813649597931520
1234813580060614656
1234813498196209664
1234813364263694336
1234812845705105408
1234812669745664000
1234812408931090432
1234811551233847296
1234811294215262208
1234811174027431936
1234810765133127680
1234810320453062656
1234810140609712128
1234809757627752448
1234809699519926272
1234809520465104896
1234808818967642112
1234808741192593408
1234807970724270080
1234806979798929408
1234806864988164096
1234806654169997312
1234806417414066176
1234806349252497408
1234806320055963648
1234805964563460096
1234805330992881664
1234804428236107776
1234804282047782912
1234804281900843008
1234804199105466368
1234804123394084864
1234804117505220608
1234803608086032384
1234803466951725056
1234803384919773184
1234803305542561792
1234803206015729664
1234803205827108864
1234802614841286656
1234802500684763136
1234802122518138880
1234800481077084160
1234799761716391936
1234799204133986304
1234798734392856576
1234798529517965312
1234798239867658240
1234798220838129664
1234798171257233408
1234797804758827008
1234797498234961920
1234796687824244736
1234796677871132672
1234796590671499264
1234796541287813120
1234796455187099648
1234796428838539264
1234796300530573312
1234796065431465984
1234795756256624640
1234795704641605632
1234795188347965440
1234795076490014720
1234794710516076544
1234794426620313600
1234793538170314752
1234793424361906176
1234793356158537728
1234792766057652224
1234792710713888768
1234792224753364992
1234791816714735616
1234791771034574848
1234791435863457792
1234790624165072896
1234790404085747712
1234790333151662080
1234790249366216704
1234788106567585792
1234788048241676288
1234787702853206016
1234787140812165120
1234787098181406720
1234786777258483712
1234786384852004864
1234785793224384512
1234785460343525376
1234785142247481344
1234784755402625024
1234784473256022016
1234784454192828416
1234784343379324928
1234784330548834304
1234784018937282560
1234783954017964032
1234783303921799168
1234783089420881920
1234782851293483008
1234782845530333184
1234782560762433536
1234782510967640064
1234781414354227200
1234781100511236096
1234780886626963456
1234780305803923456
1234780196911210496
1234779941461544960
1234779847798353920
1234778361353965568
1234777074348503040
1234777073568358400
1234776794420699136
1234776691924402176
1234776113794207744
1234776103245488128
1234775816736821248
1234775811514945536
1234775544547274752
1234775535064100864
1234775531893207040
1234774779489439744
1234774489898143744
1234773977802911744
1234773013427412992
1234773006129360896
1234773005789794304
1234772231009402880
1234770953881694208
1234769455315591168
1234769250151067648
1234768941144252416
1234768298811830272
1234768127507992576
1234767952211333120
1234767394163179520
1234767110087139328
1234766913382895616
1234766560985862144
1234765840714805248
1234765605405724672
1234765456659111936
1234765374417186816
1234765338027397120
1234765259145187328
1234764188184018944
1234763855294758912
1234763803264528384
1234763727846510592
1234763720238260224
1234763338699149312
1234763081093279744
1234763075334488064
1234762509820755968
1234762213014900736
1234761902288506880
1234761356663934976
1234761262376136704
1234761260815781888
1234760313565827072
1234759484720975872
1234759250552946688
1234759212145598464
1234758231773282304
1234758112499789824
1234758073501118464
1234757969713213440
1234757960338939904
1234757942710358016
1234754979480637440
1234754319360155648
1234752983981862912
1234752804612460544
1234751389752025088
1234751388418220032
1234751104740724736
1234751090882744320
1234751042337660928
1234750066268700672
1234749211364618240
1234748790961319936
1234748393144176640
1234747788879159296
1234747424075370496
1234747354827198464
1234746581783584768
1234746388791091200
1234745938771660800
1234745323555180544
1234745182538493952
1234744604911636480
1234744298614034432
1234744065205260288
1234742842960076800
1234742807543238656
1234742806880702464
1234742628987678720
1234742292835074048
1234742229752852480
1234741279881334784
1234740643819393024
1234739953285959680
1234739220935249920
1234738583786921984
1234738283193618432
1234737642333278208
1234736107532668928
1234735984039858176
1234734777225424896
1234731482230513664
1234730189332123648
1234728711984951296
1234728007518031872
1234727760712650752
1234726711079497728
1234726567114350592
1234725873795977216
1234724763869859840
1234723181421719552
1234720179663208448
1234719975790637056
1234718668795392000
1234717426962464768
1234715279223132160
1234714400302350336
1234713946428342272
1234713863230251008
1234710838969282560
1234708814852579328
1234707523778863104
1234706454809956352
1234705061474861056
1234705058371002368
1234705001177649152
1234704801071452160
1234704763356372992
1234704200728055808
1234702466848976896
1234699231593627648
1234697680682508288
1234697509030768640
1234697508250537984
1234697508174974976
1234696099945795584
1234690803324391424
1234690262124744704
1234687923380817920
1234687442034315264
1234686571196010496
1234685536767340544
1234684934855393280
1234684810230022144
1234683493814128640
1234683397944922112
1234682527865921536
1234682434890780672
1234681717811630080
1234681412562767872
1234680534518788096
1234679219851939840
1234678274061561856
1234677041754075136
1234676825596366848
1234675684863143936
1234671433218789376
1234668235494023168
1234667352471396352
1234667327196516352
1234666854683045888
1234661839096516608
1234661746318565376
1234660795322994688
1234660774083121152
1234660676255092736
1234659775989764096
1234659760227704832
1234658844669698048
1234656636578353152
1234656283363598336
1234655963623251968
1234655835390791680
1234653461800771584
1234652818587316224
1234652602656100352
1234650225282711552
1234649788861288448
1234648388664098816
1234647600281731072
1234642841466482688
1234640599833366528
1234640414411513856
1234638368681660416
1234637141789024256
1234636999656493056
1234633600089219072
1234632299418804224
1234628793463189504
1234628553892749312
1234628302364532736
1234627331584557056
1234626238163013632
1234625296109842432
1234623309188341760
1234622035160162304
1234621911608459264
1234620128123334656
1234619085490548736
1234618739280056320
1234617215799848960
1234615883638722560
1234615103497965568
1234614241367334912
1234613083647201280
1234611459759448064
1234611211657994240
1234610575105306624
1234610205255782400
1234609220823048192
1234609207590227968
1234607612181843968
1234606912265752576
1234604280058912768
1234603645771173888
1234603305206210560
1234601807982276608
1234601422861193216
1234600639906357248
1234600632398467072
1234600439271829504
1234600055010516992
1234597045299707904
1234597008247345152
1234596950131007488
1234596947635458048
1234594924349124608
1234594328649007104
1234593995583565824
1234593956035346432
1234592155030540288
1234592094574055424
1234591812783763456
1234591094152675328
1234590553641111552
1234587772486180864
1234586237924790272
1234509731953246208
1234509718372134912
1234458195214524416
1234455811599896576
1234449400027475968
1234426869677580288
1234351111290552320
1234325323266703360
1234203731538915328
1234170425195675648
1234109691329941504
1234094777660006400
1234060993149444096
1234047417961582592
1234038956401950720
1234029447784697856
1237310406584041472
1237310237998288896
1237309804412129280
1237309721360494592
1237309617857875968
1237309473309577216
1237309133969412096
1237309101362696192
1237308152376426496
1237308060626018304
1237307293970108416
1237307279545978880
1237307133487648768
1237304999186558976
1237304687780495360
1237304060362907648
1237303970969894912
1237303651640754176
1237303505226006528
1237303073824894976
1237302825685827584
1237302423091179520
1237238615819902976
1234646862268784640
1237398303911874560
1237398174429560832
1237397955998633984
1237397811345457152
1237397801572728832
1237397728424005632
1237397704877248512
1237397629518188544
1237397358834601984
1237397341151215616
1237397319827374080
1237397298000220160
1237397189548261376
1237397058216173568
1237396931506253824
1237396921137778688
1237396808411701248
1237396438885249024
1237396419260096512
1237396391732957184
1237396230059298816
1237396229723570176
1237396135603552256
1237395841289039872
1237395756648148992
1237395703766192128
1237395618038984704
1237395589072949248
1237395459611578368
1237394931640971264
1237394871452758016
1237394834882564096
1237394832831557632
1237394655081148416
1237394541050617856
1237394529822683136
1237394258962681856
1237394198787022848
1237394117975400448
1237393981245247488
1237393965357232128
1237393856460517376
1237393821643575296
1237393810419666944
1237393795450163200
1237393768447225856
1237393747945459712
1237393739628216320
1237393729175973888
1237393663111524352
1237393647064109056
1237393584917073920
1237393568865464320
1237393514251440128
1237393352703668224
1237393271694991360
1237393242691268608
1237393129784762368
1237392884929683456
1237392876729806848
1237392875324768256
1237392845226434560
1237392805699284992
1237392699822444544
1237392568767229952
1237392509887598592
1237392304295440384
1237392115795034112
1237392053840932864
1237392022727614464
1237391981921226752
1237391886349791232
1237391689595027456
1237391657168850944
1237391616869978112
1237391610461057024
1237391367174631424
1237391248618434560
1237391143085596672
1237390892798865408
1237390793452617728
1237390712607346688
1237390602574028800
1237390593568866304
1237390554008190976
1237390067682795520
1237390054470881280
1237389987890397184
1237389925810499584
1237389859972513792
1237389857535799296
1237389855933505536
1237389599233564672
1237389598688329728
1237389500835188736
1237389496913543168
1237389179241152512
1237388993639006208
1237388605653483520
1237388432046837760
1237388425839308800
1237388399172112384
1237388395367653376
1237388372265414656
1237388290602524672
1237388012188626944
1237387734962130944
1237387603554394112
1237387113856765952
1237387040238510080
1237386938140647424
1237386873246486528
1237386796578656256
1237386785509879808
1237386572984487936
1237386556412792832
1237386539853897728
1237386409113030656
1237386263994327040
1237386244427935744
1237386052957962240
1237385998939668480
1237385985836507136
1237385806290935808
1237385754377981952
1237385739374956544
1237385737617596416
1237385693745172480
1237385647888814080
1237385490690502656
1237385469723172864
1237385448210628608
1237385355600384000
1237385220640268288
1237384978805207040
1237384841957650432
1237384730070249472
1237384720998174720
1237384715360845824
1237384610264354816
1237384587606511616
1237384532900237312
1237384503003406336
1237384428625723392
1237384223872266240
1237384223109103616
1237384193480331264
1237384121581735936
1237383916157272064
1237383557292740608
1237383542012874752
1237383513483153408
1237383191322710016
1237383120850235392
1237383038050467840
1237383007641706496
1237382850594222080
1237382714619301888
1237382640799531008
1237382520531902464
1237382501263241216
1237382449040166912
1237382443054891008
1237382389044785152
1237382377023946752
1237382333721911296
1237382305452363776
1237382274179649536
1237382236116303872
1237382235692707840
1237382078800359424
1237381991370240000
1237381822943596544
1237381730832715776
1237381546891309056
1237381534425939968
1237381360727347200
1237381262496710656
1237381102492364800
1237381044589993984
1237381041230413824
1237380977908953088
1237380858346168320
1237380708726956032
1237380594377596928
1237380543848894464
1237380523993042944
1237380232597954560
1237380184258609152
1237380094227877888
1237380054633590784
1237379954972770304
1237379949125910528
1237379946965688320
1237379716815949824
1237379694195929088
1237379649371607040
1237379648054591488
1237379498976436224
1237379378062995456
1237379245552345088
1237379212182458368
1237379116804038656
1237378910905610240
1237378704973664256
1237378693330321408
1237378635360882688
1237378450417020928
1237378449250979840
1237378393676677120
1237378328190955520
1237378248130076672
1237378239875747840
1237378238202155008
1237378227775176704
1237378158908882944
1237378114461872128
1237378078323679232
1237378017296560128
1237377991786803200
1237377976905408512
1237377973625532416
1237377779701694464
1237377670670770176
1237377565008019456
1237377540873805824
1237377389786624000
1237377269804363776
1237377054900981760
1237377020021149696
1237376946159353856
1237376926416764928
1237376763073789952
1237376667565338624
1237376630882013184
1237376547725750272
1237376446600867840
1237376365231554560
1237376337175871488
1237376235031924736
1237376178643783680
1237376118761627648
1237376045747142656
1237375929351114752
1237375907012067328
1237375849298571264
1237375778955853824
1237375679957696512
1237375341494181888
1237375291829485568
1237375243305586688
1237375190180474880
1237375161181052928
1237374963818074112
1237374923049402368
1237374842112020480
1237374739397644288
1237374736973389824
1237374734913933312
1237374732816834560
1237374716773642240
1237374665447763968
1237374598729080832
1237374581855465472
1237374556748292096
1237374551215964160
1237374477517950976
1237374454579290112
1237374318306353152
1237374198949064704
1237374183106985984
1237373916575916032
1237373893838385152
1237373698031661056
1237373632411770880
1237373478891896832
1237373235559370752
1237373203531599872
1237373192039288832
1237373138922541056
1237373022048260096
1237372920835592192
1237372888908521472
1237372837402415104
1237372714383478784
1237372695668494336
1237372635459141632
1237372453057413120
1237372168176107520
1237372132092338176
1237372061603041280
1237372002945679360
1237371982116683776
1237371666168254464
1237371601273982976
1237371550002708480
1237371160645566464
1237371131922972672
1237371125841252352
1237371088088313856
1237371028218810368
1237370917585596416
1237370898488926208
1237370894135238656
1237370889903144960
1237370680024367104
1237370677285523456
1237370649837879296
1237370644955688960
1237370641277485056
1237370507361767424
1237370275538272256
1237370120827092992
1237370054448222208
1237370046055399424
1237370013889245184
1237369995115606016
1237369792077746176
1237369595117342720
1237369593540337664
1237369560350765056
1237369480839380992
1237369304867377152
1237369184025300992
1237369046024228864
1237368995512291328
1237368988004487168
1237368985668259840
1237368860753330176
1237368783527981056
1237368752477331456
1237368661154902016
1237368646911041536
1237368398083997696
1237368283151687680
1237368215795310592
1237368121029255168
1237367969363058688
1237367958462226432
1237367896399056896
1237367748101095424
1237367742920921088
1237367707705790464
1237367553774817280
1237367552860475392
1237367466168168448
1237367448992694272
1237367441694613504
1237367293908320256
1237367219262087168
1237367155739578368
1237367110201782272
1237367009714802688
1237366948268322816
1237366894396682240
1237366873349554176
1237366831662407680
1237366718651121664
1237366615152431104
1237366610073010176
1237366268170317824
1237365973881102336
1237365923947970560
1237365761603239936
1237365523089952768
1237365512688074752
1237365508875390976
1237365356282421248
1237365328138711040
1237365316356890624
1237365115038642176
1237365077344505856
1237365040463990784
1237365016891973632
1237364942493437952
1237364767733530624
1237364704110141440
1237364628952416256
1237364563630338048
1237364111782088704
1237363931653562368
1237363839131402240
1237363820546359296
1237363689067610112
1237363654791659520
1237363605764530176
1237363474600202240
1237363453012119552
1237363359038746624
1237363349173735424
1237363336448299008
1237363104368824320
1237362849543933952
1237362832657674240
1237362710070857728
1237362678751997952
1237362637245239296
1237362593494380544
1237362572585775104
1237362439924125696
1237362423696371712
1237362081671704576
1237362005683601408
1237361957138771968
1237361841761746944
1237361833918574592
1237361765010116608
1237361745989173248
1237361586874060800
1237361423128367104
1237361164771868672
1237361110078152704
1237361045355859968
1237361033653768192
1237361019598573568
1237360873557110784
1237360816653025280
1237360814660747264
1237360812806856704
1237360693583572992
1237360644078424064
1237360610981052416
1237360606065446912
1237360544753111040
1237360508346470400
1237360457155043328
1237360328490483712
1237360053436518400
1237359844702773248
1237359820673613824
1237359753543790592
1237359613365944320
1237359521560793088
1237359515240103936
1237359487960469504
1237359448273768448
1237359437662150656
1237359265649655808
1237359097030119424
1237359061395320832
1237358992164376576
1237358935260254208
1237358808881664000
1237358736680910848
1237358596930678784
1237358494422126592
1237358212820676608
1237358103756185600
1237357927528312832
1237357679875706880
1237357675085791232
1237357664050577408
1237357542327685120
1237357531158044672
1237357263553167360
1237357261724553216
1237357034095476736
1237357012201148416
1237356994874486784
1237356961223651328
1237356920958095360
1237356857481707520
1237356837634215936
1237356827786055680
1237356613616521216
1237356516753248256
1237356435278880768
1237356381260386304
1237356306236833792
1237356235936194560
1237356174812446720
1237355833178152960
1237355759836553216
1237355759702179840
1237355717352456192
1237355596489412608
1237355310542737408
1237355238174208000
1237355163125526528
1237355102219968512
1237355089137975296
1237355031927459840
1237355012088619008
1237354875807293440
1237354657753808896
1237354616108519424
1237354487007846400
1237354485753810944
1237354463180075008
1237354440614727680
1237354433102610432
1237354360079896576
1237354291628834816
1237354264646889472
1237354130911440896
1237353966821924864
1237353881191034880
1237353681558933504
1237353464897966080
1237353359889358848
1237353207619293184
1237353155773575168
1237353020888879104
1237352888973684736
1237352829058273280
1237352705607303168
1237352539928104960
1237352364987822080
1237352246771429376
1237352086414807040
1237351934819999744
1237351912267231232
1237351896656084992
1237351855413506048
1237351778057744384
1237351745623212032
1237351717307645952
1237351581621706752
1237351402030223360
1237351269649580032
1237351264565878784
1237351247449133056
1237351233956065280
1237350934260387840
1237350897027612672
1237350886722007040
1237350881630322688
1237350688725876736
1237350684007247872
1237350508236431360
1237350363906428928
1237350325658382336
1237350205151940608
1237350171706634240
1237350140039426048
1237349820953739264
1237349747163303936
1237349695388889088
1237349544083456000
1237349400340561920
1237349128427929600
1237349041886900224
1237348985557389312
1237348899691679744
1237348491149676544
1237348377311866880
1237348263755485184
1237348261356240896
1237348009765031936
1237347841326092288
1237347555387703296
1237347541680824320
1237347513646153728
1237347471203827712
1237347133407272960
1237346767059943424
1237346758730158080
1237346726182256640
1237346457545564160
1237346237172649984
1237345910557982720
1237345821319991296
1237345529773936640
1237345342267338752
1237345209698091008
1237345154970849280
1237344852070797312
1237344812552130560
1237344758730756096
1237344292844253184
1237344228767825920
1237344139311636480
1237344050229006336
1237343968246910976
1237343624351944704
1237343002932187136
1237342718550048768
1237342512878096384
1237342328513269760
1237342252139196416
1237342080671907840
1237342078985744384
1237342005954404352
1237341521013346304
1237341479325937664
1237340954715013120
1237340947807121408
1237340704524861440
1237340703258181632
1237340646358179840
1237340624984162304
1237340597339512832
1237340235471769600
1237340220024074240
1237340206736584704
1237340199849308160
1237339921255239680
1237339852426956800
1237339706020560896
1237339110915923968
1237339030942937088
1237338917277499392
1237338766743949312
1237338532944830464
1237338474459480064
1237338296881217536
1237338179155492864
1237338173677506560
1237338138630029312
1237338117264289792
1237337719581351936
1237337688715530240
1237337431906684928
1237337280081264640
1237336962161393664
1237336932889362432
1237336702567567360
1237336224739872768
1237335755736985600
1237335675705442304
1237335632466321408
1237335545061261312
1237335280543240192
1237335257084559360
1237335230610014208
1237334986673606656
1237334858080423936
1237334857103147008
1237334825146646528
1237334567624810496
1237334508329996288
1237334372031827968
1237334320869715968
1237334257846161408
1237334188350554112
1237334147678580736
1237334061976338432
1237333879175987200
1237333724016058368
1237333637877686272
1237333240236707840
1237332951282651136
1237332942122336256
1237332748072882176
1237332390336487424
1237332382992171008
1237331916510158848
1237331915104976896
1237331821022625792
1237331784724918272
1237331784335077376
1237331744707293184
1237331243848675328
1237331119638482944
1237331114295005184
1237330769640591360
1237330715315965952
1237330553608777728
1237330498277584896
1237330410620833792
1237330169746132992
1237329853851914240
1237329805714100224
1237329742879023104
1237329242108702720
1237329157413048320
1237328967348228096
1237328677270097920
1237328492565614592
1237328468892770304
1237328173341138944
1237328081666228224
1237327994919755776
1237327772105793536
1237327458690572288
1237327223486664704
1237327048064073728
1237327034604544000
1237326621788508160
1237326498585067520
1237325868692897792
1237325864821391360
1237325643806920704
1237325481520873472
1237325388063309824
1237324948743618560
1237324403597164544
1237324318792704000
1237324186055565312
1237323679882776576
1237323500697849856
1237323485069877248
1237323273823834112
1237323027530031104
1237322959540432896
1237322737238097920
1237322710952353792
1237322551409422336
1237322504915451904
1237322409377771520
1237322325613314048
1237322115357061120
1237321867180027904
1237321554171740160
1237321064042151936
1237321010543841280
1237320990499241984
1237320400159285248
1237319960575295488
1237319945513504768
1237319807428472832
1237319478121320448
1237319418956431360
1237319338711035904
1237319303336255488
1237319060108357632
1237318780574994432
1237318765752324096
1237318656348037120
1237318186338566144
1237318133322522624
1237317768753623040
1237317650532970496
1237317566416203776
1237317498116231168
1237317310358020096
1237317282705129472
1237316961635360768
1237316948293226496
1237316885378523136
1237316880081141760
1237316720043442176
1237316450328682496
1237316204487782400
1237316101526237184
1237315580438274048
1237315529569898496
1237315376498835456
1237314721730174976
1237314696245542912
1237314513956933632
1237314368423047168
1237313852045475840
1237313726103072768
1237313349756518400
1237312905571381248
1237312766593118208
1237312703963828224
1237312568710107136
1237312535294095360
1237312416255541248
1237312303885885440
1237311923491942400
1237311594591391744
1237311452043714560
1237311329989472256
1237311024627359744
1237311010203025408
1237170754191536128
1237040388931825664
1237038798581743616
1237023091068473344
1236032570007187456
1237696078339866624
1237696030579310592
1237695967828357120
1237695878468689920
1237695794825891840
1237695790291836928
1237695782565711872
1237695731282165760
1237695546451791872
1237695544098684928
1237695528370155520
1237695511207051264
1237695436372283392
1237695413194555392
1237695180435685376
1237695136932470784
1237694830060462080
1237694814898061312
1237694767741276160
1237694665270292480
1237694586371391488
1237694531119853568
1237694416212680704
1237694348021637120
1237694328102928384
1237693842184421376
1237693772814618624
1237693327803375616
1237693210690031616
1237693131971231744
1237692858980806656
1237692811803275264
1237692790206640128
1237692714721910784
1237692703493754880
1237692693557530624
1237692637756502016
1237692632165310464
1237692373540507648
1237692270146715648
1237692263578435584
1237692212009267200
1237692150432911360
1237692039233507328
1237692006345969664
1237691876121042944
1237691359986933760
1237691012568494080
1237691009234022400
1237690750671835136
1237690647592808448
1237690487588425728
1237690369887711232
1237690319396687872
1237690114068942848
1237689973224214528
1237689724762021888
1237689646085296128
1237689526761504768
1237689489390256128
1237689357525491712
1237689344648978432
1237689323862003712
1237689214147293184
1237689182111158272
1237689174079057920
1237689038896848896
1237689032970248192
1237688745555636224
1237688542790176768
1237688173188337664
1237688053596139520
1237687971999969280
1237687960902012928
1237687944988614656
1237687878185971712
1237687353810042880
1237687343336865792
1237687337557078016
1237687313242652672
1237687281936478208
1237687230744989696
1237687208255131648
1237687148419198976
1237686899478646784
1237686893216583680
1237686599024082944
1237686424457097216
1237686420694859776
1237686116741939200
1237686071686823936
1237686069828747264
1237686067958087680
1237686065596686336
1237685969714909184
1237685949947097088
1237685770485465088
1237685698271916032
1237685598284140544
1237685417308229632
1237685322630258688
1237685309153742848
1237685253155753984
1237685200110436352
1237684903828803584
1237684889903747072
1237684752154492928
1237684703445966848
1237684579315535872
1237684577877049344
1237684498961227776
1237684439225962496
1237684374755311616
1237684288159723520
1237684285802504192
1237683938719662080
1237683899116826624
1237683846319046656
1237683592073031680
1237683557503467520
1237683282894041088
1237683109321048064
1237683102421520384
1237683048940032000
1237682986398748672
1237682893423550464
1237682745339285504
1237682736472698880
1237682543865937920
1237681951927984128
1237681788102852608
1237681632896745472
1237681589817049088
1237681568862228480
1237681513711484928
1237681452872916992
1237681356815171584
1237681350838124544
1237681242314641408
1237681095111557120
1237681009786667008
1237680935929286656
1237680917231153152
1237680819738521600
1237680802814623744
1237680696686194688
1237680682878398464
1237680669586862080
1237680661814706176
1237680549554077696
1237680468461576192
1237680176370266112
1237680169277689856
1237680105498890240
1237680081754972160
1237679910321131520
1237679872283115520
1237679863458402304
1237679757317287936
1237679716733194240
1237679679462653952
1237679671292112896
1237679670973222912
1237679541977481216
1237679485484318720
1237679315057135616
1237679198057238528
1237679123855745024
1237678982411227136
1237678915423997952
1237678671151820800
1237678565547814912
1237678415576215552
1237678404197142528
1237678290338537472
1237678203835240448
1237678084846837760
1237677683250728960
1237677645204078592
1237677644692566016
1237677171793068032
1237677147201761280
1237676878766407680
1237676798013509632
1237676724651020288
1237676643239350272
1237676613162143744
1237676530391642112
1237676503846060032
1237676445855604736
1237676421767667712
1237676245426397184
1237676119022874624
1237676044984827904
1237675963275673600
1237675938449477632
1237675932607021056
1237675912096878592
1237675888138911744
1237675621662236672
1237675407924539392
1237675350680915968
1237675226059718656
1237675217926803456
1237675045150998528
1237674991551946752
1237674803584290816
1237674262082785280
1237674183661776896
1237674136580894720
1237674133040910336
1237673870301237248
1237673811547279360
1237673682987888640
1237673454184411136
1237673438799593472
1237673419325538304
1237673238911729664
1237673187783184384
1237673143898079232
1237673091708276736
1237673063904395264
1237673045608796160
1237672967066263552
1237672884283342848
1237672882983055360
1237672730780196864
1237672686798671872
1237672681744543744
1237672515213852672
1237672440584601600
1237672390643023872
1237672133259657216
1237672127417012224
1237671989277609984
1237671379396448256
1237671164677435392
1237671162945167360
1237670948213600256
1237670941947297792
1237670850465353728
1237670720945229824
1237670591509004288
1237670356862636032
1237670221197889536
1237669869988073472
1237669651141836800
1237669592069107712
1237669585949769728
1237669432484339712
1237669355682508800
1237669061498155008
1237669046708891648
1237668832048807936
1237668686477000704
1237668667606716416
1237668643732967424
1237668602557292544
1237668470327664640
1237668446860705792
1237668443182239744
1237668422781153280
1237668347258568704
1237668344498700288
1237668339213721600
1237668223803437056
1237668179985514496
1237667984363094016
1237667763017129984
1237667649334763520
1237667519885959168
1237667337609687040
1237666530915160064
1237666504763637760
1237666382713507840
1237666355739910144
1237666303990792192
1237666280024338432
1237665964449095680
1237665758739492864
1237665578506166272
1237665495228317696
1237665470809092096
1237665437296410624
1237665349606281216
1237665346795995136
1237665338470400000
1237665331335872512
1237665214243446784
1237665201778053120
1237665171864240128
1237665043711320064
1237664835401203712
1237664797115777024
1237664764060413952
1237664675267035136
1237664612192890880
1237664365354061824
1237664220780658688
1237664101733564416
1237663994963464192
1237663983324344320
1237663975027941376
1237663958087143424
1237663752738279424
1237663416732401664
1237663300726464512
1237662903488196608
1237662870512549888
1237662811204935680
1237662741524955136
1237662635337953280
1237662623388151808
1237662597719175168
1237662595324182528
1237662507063361536
1237662493738180608
1237662301542649856
1237662108038262784
1237662042363842560
1237661939490099200
1237661384894103552
1237661341122547712
1237661307983278080
1237661258633089024
1237661183194230784
1237661170489643008
1237661134909591552
1237661088633753600
1237660580422574080
1237660430757031936
1237660277568466944
1237660094780841984
1237659927268798464
1237659815826141184
1237659548430684160
1237659525957574656
1237659259778801664
1237659158121349120
1237659027091402752
1237658911701749760
1237658861726846976
1237658858253844480
1237658833230725120
1237658814268223488
1237658552975720448
1237658533124079616
1237658480523141120
1237658446209511424
1237658413749993472
1237658367205785600
1237658291942993920
1237658031187320832
1237657929546739712
1237657872021876736
1237657835867189248
1237657793278160896
1237657787057963008
1237657328515551232
1237657235292995584
1237657119823925248
1237657068431171584
1237657045643354112
1237657024990674944
1237657009870299136
1237657009232773120
1237656891897102336
1237656847303221248
1237656578515513344
1237656347560169472
1237656307324207104
1237656111915896832
1237656045771784192
1237656000561364992
1237655955950768128
1237655879865991168
1237655869954969600
1237655862082142208
1237655857200091136
1237655819253993472
1237655508598882304
1237655440181334016
1237655360154017792
1237655347755540480
1237655171611721728
1237655109334679552
1237655096386879488
1237654914513412096
1237654841310224384
1237654806522560512
1237654757130395648
1237654740139495424
1237654532492079104
1237654515886817280
1237654409066266624
1237654303390695424
1237654178954121216
1237654173069348864
1237653937441964032
1237653935911055360
1237653854927360000
1237653676224843776
1237653620742598656
1237653590312923136
1237653399589380096
1237653355163291648
1237653306798780416
1237653253036347392
1237653234501611520
1237653139249147904
1237653039818911744
1237652855840014336
1237652806040944640
1237652773824532480
1237652770066436096
1237652714756153344
1237652552256073728
1237652432441630720
1237652369166364672
1237652167118512128
1237652110390333440
1237651987635884032
1237651880064450560
1237651844282888192
1237651842437230592
1237651408876339200
1237651385493016576
1237651356263092224
1237651222187868160
1237651026607554560
1237651026083225600
1237650547127222272
1237650484141404160
1237650013813178368
1237649973765947392
1237649870439284736
1237649790961401856
1237649711542173696
1237649681901146112
1237649600594362368
1237649594772639744
1237649555170131968
1237649460269682688
1237649455379349504
1237649327515938816
1237649268162220032
1237649221597253632
1237648952071200768
1237648913743712256
1237648757660901376
1237648628262424576
1237648588659884032
1237648545513123840
1237648447282479104
1237648443473924096
1237648336775196672
1237647949485703168
1237647921463439360
1237647900156596224
1237647884662624256
1237647804039823360
1237647801221361664
1237647797094137856
1237647792962785280
1237647767708880896
1237647681654308864
1237647660217057280
1237647636548608000
1237647574175289344
1237647391106502656
1237647350933401600
1237647332948062208
1237647204514332672
1237647124604444672
1237646867808149504
1237646779308523520
1237646704628858880
1237646645774426112
1237646622101823488
1237646569731756032
1237646515411259392
1237646495295262720
1237646354890887168
1237646233231069184
1237646226964832256
1237646076196188160
1237645917827682304
1237645731219070976
1237645650977669120
1237645569570398208
1237645478751133696
1237645352456634368
1237645297045643264
1237645239944282112
1237645206146682880
1237645073493438464
1237645021786112000
1237644989750022144
1237644792508661760
1237644708287037440
1237644683670667264
1237644430544273408
1237644413926551552
1237644295030493184
1237644294590251008
1237644232954990592
1237644210934820864
1237643896127176704
1237643764811927552
1237643740413452288
1237643713012281344
1237643639377006592
1237643359440777216
1237643261185007616
1237643259809157120
1237642903608057856
1237642835450564608
1237642825501638656
1237642774259707904
1237642693427298304
1237642685508444160
1237642615459364864
1237642607389544448
1237642454326706176
1237642430759014400
1237642384286126080
1237642318666072064
1237642220850671616
1237642048548700160
1237642043884810240
1237642022800015360
1237641985659260928
1237641948124581888
1237641945377316864
1237641764309102592
1237641734349258752
1237641634348744704
1237641561741103104
1237641549317619712
1237641511766016000
1237641468585504768
1237641446796046336
1237641042456973312
1237641039785189376
1237640961762693120
1237640924492152832
1237640920738205696
1237640920172040192
1237640790064508928
1237640764441706496
1237640595558010880
1237640508844974080
1237640360148586496
1237640339223195648
1237640153306406912
1237640094439346176
1237639951749124096
1237639646991069184
1237639646634561536
1237639525238702080
1237639442556497920
1237639407806689280
1237639393206296576
1237639337707220992
1237639329176006656
1237639320036663296
1237639201912492032
1237639171432275968
1237639087621844992
1237639085767999488
1237639055216652288
1237639045024321536
1237638938032046080
1237638937478230016
1237638923414843392
1237638915579940864
1237638879894736896
1237638659781865472
1237638651061735424
1237638614789566464
1237638523416645632
1237638279224320000
1237638249662877696
1237638243274969088
1237638219799367680
1237638135003004928
1237638023942029312
1237637724380807168
1237637675940806656
1237637649831276544
1237637640515497984
1237637146833494016
1237637129422938112
1237637028524802048
1237636996685877248
1237636986363695104
1237636937105752064
1237636886010593280
1237636742213021696
1237636675544760320
1237636317997076480
1237636313706356736
1237636154691903488
1237635890228445184
1237635870343065600
1237635757470371840
1237635755004112896
1237635580105801728
1237635537554505728
1237635419631759360
1237635416297222144
1237635403202658304
1237635357648322560
1237635138168803328
1237635044493135872
1237634924024381440
1237634917221249024
1237634851169329152
1237634760622702592
1237634536399396864
1237634493281898496
1237634456309170176
1237634361916260352
1237634361454813184
1237634361148583936
1237634233990029312
1237633884768161792
1237633668866355200
1237633626117771264
1237633390809145344
1237633196902232064
1237633140161572864
1237632653437927424
1237632380812353536
1237632041471971328
1237631960031297536
1237631843320483840
1237631512310398976
1237631411278024704
1237631144734023680
1237630856912605184
1237630681364213760
1237630631850307584
1237630214689169408
1237630020631310336
1237629944164945920
1237629912040734720
1237629691009392640
1237629686764703744
1237629411513503744
1237629009544065024
1237628961930260480
1237628834331209728
1237628668664524800
1237628471221706752
1237628175082901504
1237628075778678784
1237627847281455104
1237627433131683840
1237627369977982976
1237627325493186560
1237627174842241024
1237627047234752512
1237626829630066688
1237626811938414592
1237626810738675712
1237626764127543296
1237626625598148608
1237626563157467136
1237625261623054336
1237624947444453376
1237624480958164992
1237624386309574656
1237624293640540160
1237624156595855360
1237624024722595840
1237624023003037696
1237623949980246016
1237623763119857664
1237623745700913152
1237623090655514624
1237623067368665088
1237623028151877632
1237622838129025024
1237622425862332416
1237622150980349952
1237622133284577280
1237621896989904896
1237621869689348096
1237621862458224640
1237621506428919808
1237621354557571072
1237620670315585536
1237619999667138560
1237619896042827776
1237619834160058368
1237619760759799808
1237619649199644672
1237619512188571648
1237619409658798080
1237619282516860928
1237618775849086976
1237618771352637440
1237618615349805056
1237618241511526400
1237618019280420864
1237617750513770496
1237617731060596736
1237617538206498816
1237617215668551680
1237616653891846144
1237616490439782400
1237616326933282816
1237616039002767360
1237615551691751424
1237615520548937728
1237615494917652480
1237615413497720832
1237615116612300800
1237614205118722048
1237614203105472512
1237613795012268032
1237613631107264512
1237613515642298368
1237613393965539328
1237613131540484096
1237613067531210752
1237613037583912960
1237613030805884928
1237612521479008256
1237611889963569152
1237611788423680000
1237611720777977856
1237611362496344064
1237610629898178560
1237609446181720064
1237609372231983104
1237609298122821632
1237607819731283968
1237607593276624896
1237607239336087552
1237605922718900224
1237605807224573952
1237605684499238912
1237605577389293568
1237605564034629632
1237605139050983424
1237604996461416448
1237604291881209856
1237604161165963264
1237602496131911680
1237601943763054592
1237600735241494528
1237600506681249792
1237600458497077248
1237600417418072064
1237600406043123712
1237599832950235136
1237599720387661824
1237599314773299200
1237599042948882432
1237598876120616960
1237597896737828864
1237597634874859520
1237596845934665728
1237596712736186368
1237596365670084608
1237595827784146944
1237595475106131968
1237595439567753216
1237595252715737088
1237594480330469376
1237594234770690048
1237594125177765888
1237593898899230720
1237593364284846080
1237593141043023872
1237592928333074432
1237592629216305152
1237592570189905920
1237592298180857856
1237592059302694912
1237591979560583168
1237591717227847680
1237591584205500416
1237591540341465088
1237591139135307776
1237591112715362304
1237590852601442304
1237590083986812928
1237589969037701120
1237589835272974336
1237589830021742592
1237589546008633344
1237589091144720384
1237588566835777536
1237588395976609792
1237588306889543680
1237588223427149824
1237588157031305216
1237587831352000512
1237586545818759168
1237586515011629056
1237586293162250240
1237584083200311296
1237583983090663424
1237582909436874752
1237581832633249792
1237581528181248000
1237581527828983808
1237581511735439360
1237581403799207936
1237581008511201280
1237579866058321920
1237579504458985472
1237578625592856576
1237577665843834880
1237577174233657344
1237577119367966720
1237576791331463168
1237576671449907200
1237576614273146880
1237576478570819584
1237576476364394496
1237576374967099392
1237576235737210880
1237575725252620288
1237574731395551232
1237574106523918336
1237573867138248704
1237573824121462784
1237573646438125568
1237573600304979968
1237573568625434624
1237573532315308032
1237573515747844096
1237572418782167040
1237572349685190656
1237571545540657152
1237570921725972480
1237570176645648384
1237569798285824000
1237569701493915648
1237568961325060096
1237568910834020352
1237568457324953600
1237568378274906112
1237568341495042048
1237568233843986432
1237568114461569024
1237567868553687040
1237567814363254784
1237567196844322816
1237567189365870592
1237567186396307456
1237566412211666944
1237565490639163392
1237564849481068544
1237564764764524544
1237564719088582656
1237564608044396544
1237564552738263040
1237564147438628864
1237564044019511296
1237564016416845824
1237563345865072640
1237563024526868480
1237562981644292096
1237562770029047808
1237562439815688192
1237561379013476352
1237560875910860800
1237560667407695872
1237560656745791488
1237560148899426304
1237560124874477568
1237559927100469248
1237559897438347264
1237559894925922304
1237559893990592512
1237559889037152256
1237559887283900416
1237559875015544832
1237559137996701696
1237559054215467008
1237559004416462848
1237558943913627648
1237558715043078144
1237557971183271936
1237557888005984256
1237557538645630976
1237556413473239040
1237555842104188928
1237555736055435264
1237554598753124352
1237554297551745024
1237554228563857408
1237554019142230016
1237553900837715968
1237553844499800064
1237553819359145984
1237553468526563328
1237552589639528448
1237552083563204608
1237551939614695424
1237551893812932608
1237551669904150528
1237551548915318784
1237551281968947200
1237551120781725696
1237550885628030976
1237550269291851776
1237550022767415296
1237549981818470400
1237549811852701696
1237548400255459328
1237548361944686592
1237547452250513408
1237546774203486208
1237546175126851584
1237545801867341824
1237545573026160640
1237545083253092352
1237545057604911104
1237544533987962880
1237544129380245504
1237543749342777344
1237543024151785472
1237542992694505472
1237542790197735424
1237542681099698176
1237541015734501376
1237540539848769536
1237540325222043648
1237540238395727872
1237539502169526272
1237539346107883520
1237539281884741632
1237539269570252800
1237538877155364864
1237538782275989504
1237538015418843136
1237536590752182272
1237535785898758144
1237535336227409920
1237534914620174336
1237533942397325312
1237533830002532352
1237532995042459648
1237532819280158720
1237532532473606144
1237532438345244672
1237532304949383168
1237532032319684608
1237531913054613504
1237531007777030144
1237530821424107520
1237529922152714240
1237528703925547008
1237527910468055040
1237527633505562624
1237526999733698560
1237526737883299840
1237526572841627648
1237525711709024256
1237524918545178624
1237524742669611008
1237524568907976704
1237524361076076544
1237523404556627968
1237523111647444992
1237522923520315392
1237522398632534016
1237522372271333376
1237522157745266688
1237522137767989248
1237522078191865856
1237521966405320704
1237521893843824640
1237521319870091264
1237521261346975744
1237521189670551552
1237520826636918784
1237520770873450496
1237520719371591680
1237520110417514496
1237520032059424768
1237519417459826688
1237519380163919872
1237519020233871360
1237518587268456448
1237517892704325632
1237517842242662400
1237517833476534272
1237517726542749696
1237517532317143040
1237517359880921088
1237517145291902976
1237517115051008000
1237516594848260096
1237516325271945216
1237515116746162176
1237514822553460736
1237514548346679296
1237514456889872384
1237513815639687168
1237513703269879808
1237513629475487744
1237513590120333312
1237513566917242880
1237513566673965056
1237513566170775552
1237513249802686464
1237512422782464000
1237512414846836736
1237512332512645120
1237512310454915072
1237511748267249664
1237511743280230400
1237511590565601280
1237511253263880192
1237511071629365248
1237510987898470400
1237510827869077504
1237510395503525888
1237510240452481024
1237510220529664000
1237510202351484928
1237509789216882688
1237509253725855744
1237509217440763904
1237508910875119616
1237508808735416320
1237508159620681728
1237508119258775552
1237508043987808256
1237507652567150592
1237507524280168448
1237507284676169728
1237507272844046336
1237506799701499904
1237506444561285120
1237506245629808640
1237506106831917056
1237506087403663360
1237506061919236096
1237506014674472960
1237505788089782272
1237505763519508480
1237505276808323072
1237504691795136512
1237504507774291968
1237504446428409856
1237504362903044096
1237504284737990656
1237504200780779520
1237504183667834880
1237503744000110592
1237503665860227072
1237502681926828032
1237502389017444352
1237502188571803648
1237501952709312512
1237500825074876416
1237500516013428736
1237500230171602944
1237500114635075584
1237500012264706048
1237499489168089088
1237499472374108160
1237499406762545152
1237499220032024576
1237498636780568576
1237498466399477760
1237498379707584512
1237498128556793856
1237497866295394304
1237497547582607360
1237497058677764096
1237496173780283392
1237495954120617984
1237495948504424448
1237495808485883904
1237495554415853568
1237495095655460864
1237494748669231104
1237494711922962432
1237494689772613632
1237494573494132736
1237494510189514752
1237494437929836544
1237494246724317184
1237493992784306176
1237493950685954048
1237493402012393472
1237493375126966272
1237493042468327424
1237492817032699904
1237492788331151360
1237492714469560320
1237492383010320384
1237492273472065536
1237492180287094784
1237491982471225344
1237491668204392448
1237491266222505984
1237491239387303936
1237491207040884736
1237491048311590912
1237490991101358080
1237490985862672384
1237490937313492992
1237490915544989696
1237490915511431168
1237490914836316160
1237490850134929408
1237490825128480768
1237490743503175680
1237490609151258624
1237490554776113152
1237490436127760384
1237490321283522560
1237490276802928640
1237489183591206912
1237489159855411200
1237488665993121792
1237488610233987072
1237488398236958720
1237487902562672640
1237487765379584000
1237487737814605824
1237487579500511232
1237487272636923904
1237487140453453824
1237486936803233792
1237486900883013632
1237486706615410688
1237486650730692608
1237485972549439488
1237485870988414976
1237485715023421440
1237485643137036288
1237484996434243584
1237484890922213376
1237484851428839424
1237484789621501952
1237484694494740480
1237484690984050688
1237484655554760704
1237484487463796736
1237484399421280256
1237484147922423808
1237484138665517056
1237483586955005952
1237483421351452672
1237483367156690944
1237483365101711360
1237483108229939200
1237483022263484416
1237482539817762816
1237481737938231296
1237481626885447680
1237481297691508736
1237480929637142528
1237480899509276672
1237480875580940288
1237480848691167232
1237480740985532416
1237480364077187072
1237480148380909568
1237480038863450112
1237480030998945792
1237479031727099904
1237478862004654080
1237478357022932992
1237477898732343296
1237477853710692352
1237477795975983104
1237477794772389888
1237477752741167104
1237477696885731328
1237477249164722176
1237476753628692480
1237476585478946816
1237476091536838656
1237476087908581376
1237475934430789632
1237475840943968256
1237475826121052160
1237475816495251456
1237475815433965568
1237475815371296768
1237475744550457344
1237475324834779136
1237474188962586624
1237473978714750976
1237473946473304064
1237473456440082432
1237473267755204608
1237472645572169728
1237472499123638272
1237472062370914304
1237472040958832640
1237471789195784192
1237471780765347840
1237471494059384832
1237471016043130880
1237470875559002112
1237470571165876224
1237470449988259840
1237470165140410368
1237470124937850880
1237469592785649664
1237469286035308544
1237469212681125888
1237469126827708416
1237469052794273792
1237468272141971456
1237468014016180224
1237467268034048000
1237467007483875328
1237466703338102784
1237466521913503744
1237466130115067904
1237465936740958208
1237465690782777344
1237465497328922624
1237465266495381504
1237465245850968064
1237465123759042560
1237465002895765504
1237464842275078144
1237464491153068032
1237464490926575616
1237464393870233600
1237464203939573760
1237463884761620480
1237463151706341376
1237462949167599616
1237462883979726848
1237462580056272896
1237461928194322432
1237461504519217152
1237461353172021248
1237460967748820992
1237460942801244160
1237460106117341184
1237459935912484864
1237459789266944000
1237459689094492160
1237459659080040448
1237459259295780864
1237459222373097472
1237458741005619200
1237458498465775616
1237458471316054016
1237458433177079808
1237458392274386944
1237458039357276160
1237457957962616832
1237457821198843904
1237457542638440448
1237457352674217984
1237457012428021760
1237457005889179648
1237456941024075776
1237456650518306816
1237456434700353536
1237455906637590528
1237455871531192320
1237455682737070080
1237455450557349888
1237455095991873536
1237454639295008768
1237454424655777792
1237454368732938240
1237453669681049600
1237453643751854080
1237453560025153536
1237453480241094656
1237453169917145088
1237452987200606208
1237452150919368704
1237451955112419328
1237451923286102016
1237451907913773056
1237451387421810688
1237451269888933888
1237451229078466560
1237451087319367680
1237451059259478016
1237450972651274240
1237450922604867584
1237450639858253824
1237450348119425024
1237450195367079936
1237450162844262400
1237450151993753600
1237449875010322432
1237449670525194240
1237449530502574080
1237449242010169344
1237449041048244224
1237448972316422144
1237448904448278528
1237448850387935232
1237448217610145792
1237447976223637504
1237447944200126464
1237447888172654592
1237447726775894016
1237447719733678080
1237447717368012800
1237447399850852352
1237447366741045248
1237447295102222336
1237447137346179072
1237446914175643648
1237446874686205952
1237446809406095360
1237446776262660096
1237446717206921216
1237446647828885504
1237446502718623744
1237446499660967936
1237446387798814720
1237446377736552448
1237446371575291904
1237446260879024128
1237446139177324544
1237446009862656000
1237445864437755904
1237445759433412608
1237445627736285184
1237445411092205568
1237445386056486912
1237445298047406080
1237445232272330752
1237444998863429632
1237444941263122432
1237444830839615488
1237444629987053568
1237444472260214784
1237444404404719616
1237444284216819712
1237444089194450944
1237443974249488384
1237443937104732160
1237443637597872128
1237443456588566528
1237443311478149120
1237442714762805248
1237442548064571392
1237442527055228928
1237442336034095104
1237442265175470080
1237442163551674368
1237441515812802560
1237441454022287360
1237441407993778176
1237440977184468992
1237440910948028416
1237440903998066688
1237440588728930304
1237440583288963072
1237440583242637312
1237440196611883008
1237440102869143552
1237439963450482688
1237439867342262272
1237439835620569088
1237439403284402176
1237439325148573696
1237439301518069760
1237439086492823552
1237438086210105344
1237437920333705216
1237437884782776320
1237437723910250496
1237437687356968960
1237437416136421376
1237437381374095360
1237436885708025856
1237436747941847040
1237436439425499136
1237436301781196800
1237436286560075776
1237436053352521728
1237435894140768256
1237435891687161856
1237435855075188736
1237435437716836352
1237435131503292416
1237435066596425728
1237434826489241600
1237434452957069312
1237434437845073920
1237433602998251520
1237433593170976768
1237433585264664576
1237433572983746560
1237433555979927552
1237433539391619072
1237433435536400384
1237433434844336128
1237433418373369856
1237433327629545472
1237433294771367936
1237433193416048640
1237433113623617536
1237432733774884864
1237432725667287040
1237432700384038912
1237432595815600128
1237432506913341440
1237432457143758848
1237432381469908992
1237432346451771392
1237432299676991488
1237432158328893440
1237432042461237248
1237431847132565504
1237431845878284288
1237431348836683776
1237431336174006272
1237431294700683264
1237431285888532480
1237431159983706112
1237430958703415296
1237430898074812416
1237430865388613632
1237430710648147968
1237430518297346048
1237430517823234048
1237430516858515456
1237430417843781632
1237430349371789312
1237430306719830016
1237430054822514688
1237430038443765760
1237430029706915840
1237429858415841280
1237429588835348480
1237429544933605376
1237429351467102208
1237429306491457536
1237429117752152064
1237429064614510592
1237428933236117504
1237428772636426240
1237428745012641792
1237428626443980800
1237428528909406208
1237428495996895232
1237428474442387456
1237428425540993024
1237428223203393536
1237428094530715648
1237428018571812864
1237428000796401664
1237427915228352512
1237427823658188800
1237427583484153856
1237427528765255680
1237427526529699840
1237427460721061888
1237427189248856064
1237427177009922048
1237426977684033536
1237426245979209728
1237425895226380288
1237425787323789312
1237425595987918848
1237425373681291264
1237424998949715968
1237424848277778432
1237424798478880768
1237424778824343552
1237424590684553216
1237424477127860224
1237424443405873152
1237424368738803712
1237424085233172480
1237424057815052288
1237424012327821312
1237424003553296384
1237423989615726592
1237423763374907392
1237423468448227328
1237423068605288448
1237423027656278016
1237422757253730304
1237422726916083712
1237422544493436928
1237421861581053952
1237421796426727424
1237421524874911744
1237421459842179072
1237421168392638464
1237421120002777088
1237421077015302144
1237420845410238464
1237420711486132224
1237420697116434432
1237419947153936384
1237419625815724032
1237419394868936704
1237419244247306240
1237418902570893312
1237418852444758016
1237418756030320640
1237418754524536832
1237418435505721344
1237418285051805696
1237418226520293376
1237417591301459968
1237417068674383872
1237416947932938240
1237416926672048128
1237416902810533888
1237416867280515072
1237416686686478336
1237416675827314688
1237416444557537280
1237416205872488448
1237416105402081280
1237416032341495808
1237415946219708416
1237415551300968448
1237415426025537536
1237415420350599168
1237414698720440320
1237414677820342272
1237414552381186048
1237414355119022080
1237414289780150272
1237414190190456832
1237414053074677760
1237413949877993472
1237413685313695744
1237413676287545344
1237413328676364288
1237413293758783488
1237413278466420736
1237413270065164288
1237412754958540800
1237412663430348800
1237412645420089344
1237412506706026496
1237412309498281984
1237412158327205888
1237412018497478656
1237411996544503808
1237411898548793344
1237411894308331520
1237411642494709760
1237411620885868544
1237411504280023040
1237411179909328896
1237410995540197376
1237410668384530432
1237410658569916416
1237410448644943872
1237410396178386944
1237410146516639744
1237410026941231104
1237409886625021952
1237409769486508032
1237409714272710656
1237409629384081408
1237409505190629376
1237409179024965632
1237409155763376128
1237409141162938368
1237408894856712192
1237408780188446720
1237408777621692416
1237408660768186368
1237408518317191168
1237408334329851904
1237408297604526080
1237408225445777408
1237408134357872640
1237407990426329088
1237407980355715072
1237407486224879616
1237407291013545984
1237406986834247680
1237406894542725120
1237406670260711424
1237406545295454208
1237406254538133504
1237406222661320704
1237405923079004160
1237405645013475328
1237405593096388608
1237405510866878464
1237405398652551168
1237405214199746560
1237404953729269760
1237404758396342272
1237404426912096256
1237404367776395264
1237404177049010176
1237403959624679424
1237403585954054144
1237403457457446912
1237403268785020928
1237403190611644416
1237403162627227648
1237403081710632960
1237402999338786816
1237402901070385152
1237402834561187840
1237402834544594944
1237402443278843904
1237402422932357120
1237402393907781632
1237402268590321664
1237402186629492736
1237402142211801088
1237401966457864192
1237401645253898240
1237401579164237824
1237401139135594496
1237401105484656640
1237401092817850368
1237400960416329728
1237400896696393728
1237400367853428736
1237400356335824896
1237400353890541568
1237400181760495616
1237399301665558528
1237399237375209472
1237399153715613696
1237399065584943104
1237398696909778944
1237398667772014592
1237398610557448192
1237398555352072192
1237398451337531392
1237393079281147904
1237383240479936512
1237382846743867392
1237375917548113920
1237368746815053824
1237360355803828224
1237359986000506880
1237357170653630464
1237354574060621824
1237352018639011840
1237339179547312128
1237329744355397632
1237324207001763840
1237311027030736896
1237199918332358656
1237163948345937920
1237159748073426944
1237139524318355456
1237137103739379712
1237108410425806848
1237091108880080896
1237086638309658624
1237079343253172224
1237075564822802432
1237074060556652544
1237074057574539264
1237058373620846592
1237034039439249408
1236996340904755200
1236986869369495552
1236970302174879744
1236968824072798208
1236949381133283328
1236772066973499392
1236676319766700032
1236549344750436352
1236530797932187648
1236389298141683712
1236245997430484992
1236101657672310784
1236054206689099776
1236048551999721472
1235911227274076160
1235860437872168960
1235856422316826624
1235691574392000512
1235670279407325184
1235641868026654720
1235574677654790144
1235554086822567936
1235500965861543936
1235355736810520576
1235298105987420160
1235294964025823232
1235204113413156864
1235141461471105024
1235003125603287040
1234975869199736832
1234896065494568960
1234892683296067584
1234836055813050368
1234667200046227456
1237767460377571328
1237767245444468736
1237767103324839936
1237767102221758464
1237767076770729984
1237767042675216384
1237766922621648896
1237766725900341248
1237766505783128064
1237766480638414848
1237766480634105856
1237766121320615936
1237765751496478720
1237765359672987648
1237765301015543808
1237765282946572288
1237765222238056448
1237764761581912064
1237764756691435520
1237764661757579264
1237764268902268928
1237764052367085568
1237763831893577728
1237763747143462912
1237763720127840256
1237763627513503744
1237763567002288128
1237763486576529408
1237763484462379008
1237763474379415552
1237763243764068352
1237763230358888448
1237763219537657856
1237763209265926144
1237763158749646848
1237763149236965376
1237763046958923776
1237762837860270080
1237762706737790976
1237762705647235072
1237762520099835904
1237762516819890176
1237762315233169408
1237762241484722176
1237762213194022912
1237762207947128832
1237761823434313728
1237761725262229504
1237761554789138432
1237761321317412864
1237761253512228864
1237761237347336192
1237761195844632576
1237760961861296128
1237760934615146496
1237760685867765760
1237760663545622528
1237760661033279488
1237760359148261376
1237760345009270784
1237760339980279808
1237760033074679808
1237759846277091328
1237759818066264064
1237759759815712768
1237759584573493248
1237759448506142720
1237759114983473152
1237758931075817472
1237758819251507200
1237758654708883456
1237758616528130048
1237758528267456512
1237758520780558336
1237758246959697920
1237758197471088640
1237757815566905344
1237757748642607104
1237757679940128768
1237757671090110464
1237757424846671872
1237757399932469248
1237757228561596416
1237757227156606976
1237757169400938496
1237757106306105344
1237757004258697216
1237756607079030784
1237756472542613504
1237756414572900352
1237756393576452096
1237756392250851328
1237756273447272448
1237756178438000640
1237755937856933888
1237755928142917632
1237755856688742400
1237755798891245568
1237755788950634496
1237755733472612352
1237755726174605312
1237754800248369152
1237754670849896448
1237754470290919424
1237754171274788864
1237754088043003904
1237753911366373376
1237753850330787840
1237753805292417024
1237753800213086208
1237753715194507264
1237753384280764416
1237753249744203776
1237753066516078592
1237752840078180352
1237752827981766656
1237752306768252928
1237752157815930880
1237752136756269056
1237751774523486208
1237751700980711424
1237751694248869888
1237751674124427264
1237751480205086720
1237751449792241664
1237751438060720128
1237751405550751744
1237751278413008896
1237751108841472000
1237751107717341184
1237750926301114368
1237750902552920064
1237750811750473728
1237750695895240704
1237750626244755456
1237750122936664064
1237749920779681792
1237749908746182656
1237749882061869056
1237749419669360640
1237749109320278016
1237749078773153792
1237748751516569600
1237748601352343552
1237748387308613632
1237748386721382400
1237748379469451264
1237748375589662720
1237748166897926144
1237748061683757056
1237747870872133632
1237747648448397312
1237747633248038912
1237747601924968448
1237747281887145984
1237747225075372032
1237747077767184384
1237747030606446592
1237746974553772032
1237746943255773184
1237746717128351744
1237746714569854976
1237746709104648192
1237746698413318144
1237746652242468864
1237746634215260160
1237746369147830272
1237746367965126656
1237746355281506304
1237746258640543744
1237746047897698304
1237745932915138560
1237745915798016000
1237745808021303296
1237745504135643136
1237745497005264896
1237745354579169280
1237745153739194368
1237745107555803136
1237744725110558720
1237744479135809536
1237744479039377408
1237744120170496000
1237743831795355648
1237743723229982720
1237743716124643328
1237743416123031552
1237743201039024128
1237743066947227648
1237742892569055232
1237742771974307840
1237742176542621696
1237742150676361216
1237741595174277120
1237741412898177024
1237741400499916800
1237741314998861824
1237741230135676928
1237741205212954624
1237741089571966976
1237741083775455232
1237741083335036928
1237741081934077952
1237740974404784128
1237740844850929664
1237740843806494720
1237740838936956928
1237740706015391744
1237740671949312000
1237740471729950720
1237740369951051776
1237740072121831424
1237740062642757632
1237740062248484864
1237740057060093952
1237739712506290176
1237739486009856000
1237739413553192960
1237739181805383680
1237739172468834304
1237739090444988416
1237738928284798976
1237738925684383744
1237738722503938048
1237738205652365312
1237738127344701440
1237738111934836736
1237738074936918016
1237737783269171200
1237737745096851456
1237737105985544192
1237736908438097920
1237736861419831296
1237736764690903040
1237736751780724736
1237736618280259584
1237736375266533376
1237736281934716928
1237736281712611328
1237736123755003904
1237735802827935744
1237735788969746432
1237735585651007488
1237735578457772032
1237735527694155776
1237735475038818304
1237735429232889856
1237735280330846208
1237734916458250240
1237734814331080704
1237734721964191744
1237734589210206208
1237734341477896192
1237734332921524224
1237734328836263936
1237734275329544192
1237734105162358784
1237734078339788800
1237733904896974848
1237733802165833728
1237733797283737600
1237733780435042304
1237733545554083840
1237733453103280128
1237733445566189568
1237733422233083904
1237733304998268928
1237733287222804480
1237733267761225728
1237733204913610752
1237733073158111232
1237733050416607232
1237733010327384064
1237732853649203200
1237732848616058880
1237732553991303168
1237732508097286144
1237732506797060096
1237732362173263872
1237732265716641792
1237732231340310528
1237732084673904640
1237731971079516160
1237731957196427264
1237731856654663680
1237731835938996224
1237731806176317440
1237731586738659328
1237731582783434752
1237731579864195072
1237731554283175936
1237731454362230784
1237731344261808128
1237731338691756032
1237731264230305792
1237731131711086592
1237731034294366208
1237731019593117696
1237730994523901952
1237730614528352256
1237730556844146688
1237730479517958144
1237730335795838976
1237730208314245120
1237730193055326208
1237729990365478912
1237729805254172672
1237729650140491776
1237729604263120896
1237729500168957952
1237729452932694016
1237729380606017536
1237729021691080704
1237728998496534528
1237728985624317952
1237728983585677312
1237728880766713856
1237728794099712000
1237728731856171008
1237728601916747776
1237728431674134528
1237728394172866560
1237728295082393600
1237728239734468608
1237728084977213440
1237728069391020032
1237727990466752512
1237727889644273664
1237727872971952128
1237727747805511680
1237727709725368320
1237727643086307328
1237727537066901504
1237727473653047296
1237727209164587008
1237727018801922048
1237726984433733632
1237726970336530432
1237726953509212160
1237726943878844416
1237726927999373312
1237726840376229888
1237726711615193088
1237726423692926976
1237726357204938752
1237726243987943424
1237726227730964480
1237726159766519808
1237726067797798912
1237726055097446400
1237726044091748352
1237726025947250688
1237725811815448576
1237725778810474496
1237725738117234688
1237725602272051200
1237725314316460032
1237725187103174656
1237725136863797248
1237725112444555264
1237725046275178496
1237725030735171584
1237724978331684864
1237724957825695744
1237724932966146048
1237724845862838272
1237724802145796096
1237724709523001344
1237724648604930048
1237724550747631616
1237724521022570496
1237724319591075840
1237724308513972224
1237724284212166656
1237724268395483136
1237724266508025856
1237724170567520256
1237724134022369280
1237724109737508864
1237724074178228224
1237723989285486592
1237723922004692992
1237723843764129792
1237723753376694272
1237723705427611648
1237723698758660096
1237723514033053696
1237723445103861760
1237723318620508160
1237723172155375616
1237723150705623040
1237722908241170432
1237722745091350528
1237722699016941568
1237722519072673792
1237722517248323584
1237722450747625472
1237722340827561984
1237721971623747584
1237721967916007424
1237721966557134848
1237721717981790208
1237721573320245248
1237721528839651328
1237721363059744768
1237721307615199232
1237721080195887104
1237720748673957888
1237720710950334464
1237720701387395072
1237720686690332672
1237720671377031168
1237720427557863424
1237720303523876864
1237720287614992384
1237720283861192704
1237720260142419968
1237720124683161600
1237720082865737728
1237719974069878784
1237719959637307392
1237719923843117056
1237719625762308096
1237719584158990336
1237719431628779520
1237719408082116608
1237718968640692224
1237718953864114176
1237718778521227264
1237718769784553472
1237718284373540864
1237718184725274624
1237718178945478656
1237718155629338624
1237718127040958464
1237718111211618304
1237717785339363328
1237717730129821696
1237717462386462720
1237717348217434112
1237717280001327104
1237717225500487680
1237717216507944960
1237716773211967488
1237716181882212352
1237716149128888320
1237715824770723840
1237715683447910400
1237715553831313408
1237715496906219520
1237715460914700288
1237715302709854208
1237715038607212544
1237714914023821312
1237714781827710976
1237714669118390272
1237714641586962432
1237714526599970816
1237714426532413440
1237714309645508608
1237714281648529408
1237713798972260352
1237713749672374272
1237713665090093056
1237713272343654400
1237713267302076416
1237713022874861568
1237712878171545600
1237712713394065408
1237712697610964992
1237712554757144576
1237712538797838336
1237712441296986112
1237712297671483392
1237712227203002368
1237711945798758400
1237711859702251520
1237711834041454592
1237711658077892608
1237711619309932544
1237711540570259456
1237711459448229888
1237711257521831936
1237711096615563264
1237710952709193728
1237710700400857088
1237710646361436160
1237710639100985344
1237710630314008576
1237710624479641600
1237710613394206720
1237710486956883968
1237710442522464256
1237710350511935488
1237710308518629376
1237710272594194432
1237709988790927360
1237709858218151936
1237709857492357120
1237709777356103680
1237709658074124288
1237709653154373632
1237709368612679680
1237709343153422336
1237709321095561216
1237709317404573696
1237709299595595776
1237709241676214272
1237709170247454720
1237709046519562240
1237708898997604352
1237708851077697536
1237708811491848192
1237708694416130048
1237708694223110144
1237708599180144640
1237708490224701440
1237708421866143744
1237708337610780672
1237708132949917696
1237707966696095744
1237707915022262272
1237707855706427392
1237707837259857920
1237707671467417600
1237707625778696192
1237707588738965504
1237707588441198592
1237707355732746240
1237707222605430784
1237707191802617856
1237707176506019840
1237706970372747264
1237706705854779392
1237706699240345600
1237706550124269568
1237706321866227712
1237706293680443392
1237706292413837312
1237706280287993856
1237706201317720064
1237706166358224896
1237706112843087872
1237706082572627968
1237706043469291520
1237705584536928256
1237705573245882368
1237705427107885056
1237705368198938624
1237704824352837632
1237704735043526656
1237704611223310336
1237704553044283392
1237704487793504256
1237704375151276032
1237704175326310400
1237704143722119168
1237704139846672384
1237704059232178176
1237703598462488576
1237703552253988864
1237703545887109120
1237703536328290304
1237703402836103168
1237703097838960640
1237703076452208640
1237702957178765312
1237702774747512832
1237702622058078208
1237702584829435904
1237702548917760000
1237702297720958976
1237702276480991232
1237702274819993600
1237702259108122624
1237701887593496576
1237701727605964800
1237701694097690624
1237701374206500864
1237701372885286912
1237701346020777984
1237701260645720064
1237701147453988864
1237701138331447296
1237701121621274624
1237701095402672128
1237700887491096576
1237700697858232320
1237700669890576384
1237700663653498880
1237700661682360320
1237700653935452160
1237700596708196352
1237700580388241408
1237700567935463424
1237700347705122816
1237700271205122048
1237700124844994560
1237700065373741056
1237700051612336128
1237699879528542208
1237699870057738240
1237699735936315392
1237699659570614272
1237699598111604736
1237699322755588096
1237699045553926144
1237698285089042432
1237698164603445248
1237698089030422528
1237698036584906752
1237697873501921280
1237697635777118208
1237697429014827008
1237697331224547328
1237697300346085376
1237697274643222528
1237697151834247168
1237696819804753920
1237696707502080000
1237696649310490624
1237696570352709632
1237696313476689920
1237696310809104384
1237696155615498240
1237696094852825088
1237416711189561344
1237412717016821760
1237333193407098880
1237152695154327552
1236945285764579328
1236624053349171200
1236257137623306240
1236247282858815488
1236196639716651008
1235750967271919616
1235522445278433280
1235101843811790848
1234985709997441024
1237778200257757184
1237778058599374848
1237777903787675648
1237777871101464576
1237777865099350016
1237777855976820736
1237777806861504512
1237777806601236480
1237777805254905856
1237777694588362752
1237777525151055872
1237777264470896640
1237777137077108736
1237777127677800448
1237777066080096256
1237776890464735232
1237776877948993536
1237776871955337216
1237776634482241536
1237776307879960576
1237776304340164608
1237776185750241280
1237776152447549440
1237776034642173952
1237775927469375488
1237775852626161664
1237775822209069056
1237775809961693184
1237775600468754432
1237775498786136064
1237775298327969792
1237774868097179648
1237774751101140992
1237774675201200128
1237774514873929728
1237774303963176960
1237774030968668160
1237774030532296704
1237774030402228224
1237773982813818880
1237773750998904832
1237773664860409856
1237773612289007616
1237773612284854272
1237773432835760128
1237772892319944704
1237772839098474496
1237772363342712832
1237772332195815424
1237772187467210752
1237771967945637888
1237771722939645952
1237771686738571264
1237771622284759040
1237771617880719360
1237771535127019520
1237771500708605952
1237771426763079680
1237771397541355520
1237771211628785664
1237770915116716032
1237770873735610368
1237770870799687680
1237770848515358720
1237770732849037312
1237770542192582656
1237770393852588032
1237770288034652160
1237770256849879040
1237770206816145408
1237770096170450944
1237770050867793920
1237769693621972992
1237769686131113984
1237769642711617536
1237769639045758976
1237769513187381248
1237769470074146816
1237769458539692032
1237769442144157696
1237769353682132992
1237769188124524544
1237769033593884672
1237768901846597632
1237768834762903552
1237768544269598720
1237768538351427584
1237768410622238720
1237768304703537152
1237768295354454016
1237768171152605184
1237767920572391424
1237767893728792576
1237767871759089664
1238157331440865280
1238157283214766080
1238157277426782208
1238157250885230592
1238157160867074048
1238157160472813568
1238157147185336320
1238157143192322048
1238157064838529024
1238157031430905856
1238156968168247296
1238156899419291648
1238156895006810112
1238156834038571008
1238156825800978432
1238156790879182848
1238156728551735296
1238156725250859008
1238156722453299200
1238156691222310912
1238156690735820800
1238156684918288384
1238156638185496576
1238156611371311104
1238156594719965184
1238156591330975744
1238156581121990656
1238156577862975488
1238156577489608704
1238156564172857344
1238156553661886464
1238156551090814976
1238156550415495168
1238156456660254720
1238156407591092224
1238156406030774272
1238156378205827072
1238156375693438976
1238156329694494720
1238156283989147648
1238156209225641984
1238156199591198720
1238156154787807232
1238156135472955392
1238156124932669440
1238156113612345344
1238156096168177664
1238156069949583360
1238156062840303616
1238155932489510912
1238155913027973120
1238155776847462400
1238155770350505984
1238155749781463040
1238155748187803648
1238155676653887488
1238155658945597440
1238155554989551616
1238155488694583296
1238155472110342144
1238155439675752448
1238155427499724800
1238155396415660032
1238155342296551424
1238155327440334848
1238155313146212352
1238155294284242944
1238155293491511296
1238155275800137728
1238155227368493056
1238155225917272064
1238155219109908480
1238155202445938688
1238155194669694976
1238155142429642752
1238155132820426752
1238155101031800832
1238155096153784320
1238155062523727872
1238155046140985344
1238155041871138816
1238155040495489024
1238155033335693312
1238154995557707776
1238154920282513408
1238154913735008256
1238154879668875264
1238154817958223872
1238154817425403904
1238154813713637376
1238154697485291520
1238154646574809088
1238154598176690176
1238154579335884800
1238154568460099584
1238154510356406272
1238154462000275456
1238154407990005760
1238154363232796672
1238154330005319680
1238154286246354944
1238154277408964608
1238154254738743296
1238154220676747264
1238154149608534016
1238154145686847488
1238154142339805184
1238154087071391744
1238154047296802816
1238154038610481152
1238154014577000448
1238154005328601088
1238153962907467776
1238153931345342464
1238153830195486720
1238153825162276864
1238153805193240576
1238153797492408320
1238153782757928960
1238153681654165504
1238153680664264704
1238153598346899456
1238153533247102976
1238153497813692416
1238153495968190464
1238153459423236096
1238153452578115584
1238153429882716160
1238153373771161600
1238153353701593088
1238153348869697536
1238153302094774272
1238153298378731520
1238153279546298368
1238153168959098880
1238153167545593856
1238153098973057024
1238153056547680256
1238152941753819136
1238152906953625600
1238152869414604800
1238152804708937728
1238152754478092288
1238152673616179200
1238152594293432320
1238152535690678272
1238152524630294528
1238152474935975936
1238152428014493696
1238152363921289216
1238152333835603968
1238152307512086528
1238152272686661632
1238152167225044992
1238152163529904128
1238152159394279424
1238152114096005120
1238152073901981696
1238152010001719296
1238152006218506240
1238151960055824384
1238151859640176640
1238151837297115136
1238151832389763072
1238151831211200512
1238151795383435264
1238151772859969536
1238151743848026112
1238151681667366912
1238151667935105024
1238151664676175872
1238151658128830464
1238151655000064000
1238151617150664704
1238151588948123648
1238151542873653248
1238151524917882880
1238151517720412160
1238151517690941440
1238151461395222528
1238151403769597952
1238151393015283712
1238151359834226688
1238151355170263040
1238151312509894656
1238151264028053504
1238151174819373056
1238151165570883584
1238151126236704768
1238151113230233600
1238151110914949120
1238151109748953088
1238151083219988480
1238151042732359680
1238151039674658816
1238151016152956928
1238150941360009216
1238150937421721600
1238150713907261440
1238150696383496192
1238150692122083328
1238150653987479552
1238150580369047552
1238150562417455104
1238150557774352384
1238150546546024448
1238150536546967552
1238150506503114752
1238150485816770560
1238150474521591808
1238150428526891008
1238150365889138688
1238150344498184192
1238150303020658688
1238150259634851840
1238150132803264512
1238150083650224128
1238150057427267584
1238150042135003136
1238150013366255616
1238150006672101376
1238149955753332736
1238149928712577024
1238149927068409856
1238149791470755840
1238149772336381952
1238149656380653568
1238149623501357056
1238149608469082112
1238149575355088896
1238149555000131584
1238149546229653504
1238149544967319552
1238149489774428160
1238149477170626560
1238149383905898496
1238149363660197888
1238149329367556096
1238149328906133504
1238149278314270720
1238149269556613120
1238149162870415360
1238149161393897472
1238149151742922752
1238149126791073792
1238149111670423552
1238149106339627008
1238149068838273024
1238149061557043200
1238149044603686912
1238149001284743168
1238148969156526080
1238148948877086720
1238148914794180608
1238148869831241728
1238148827611357184
1238148789803913216
1238148782186991616
1238148778349203456
1238148771667738624
1238148760955498496
1238148759520808960
1238148749823578112
1238148749643276288
1238148722518712320
1238148693762748416
1238148651698081792
1238148626452566016
1238148608681271296
1238148544328093696
1238148542658740224
1238148537701019648
1238148482676011008
1238148481338019840
1238148430590926848
1238148421401313280
1238148380850655232
1238148356544831488
1238148354628083712
1238148287955382272
1238148286764253184
1238148278031716352
1238148169462153216
1238148158796042240
1238148137472196608
1238148115737317376
1238148107012980736
1238148067309826048
1238148040533463040
1238147996933595136
1238147939970711552
1238147925571756032
1238147894869479424
1238147860862062592
1238147782332035072
1238147766666354688
1238147760425230336
1238147754158850048
1238147748047839232
1238147746416062464
1238147683702861824
1238147556695252992
1238147457848131584
1238147451107905536
1238147415766634496
1238147396946857984
1238147376352649216
1238147350163529728
1238147297512501248
1238147263765110784
1238147260522942464
1238147254516506624
1238147102053629952
1238147083443601408
1238147074933342208
1238147059041132544
1238147010819174400
1238146992670420992
1238146989008846848
1238146987968479232
1238146987544829952
1238146975624843264
1238146958797094912
1238146870381285376
1238146833697984512
1238146815389827072
1238146643456856064
1238146484610060288
1238146467019345920
1238146466025222144
1238146450204372992
1238146422505168896
1238146386568318976
1238146301524619264
1238146221795090432
1238146195253604352
1238146182385479680
1238146110511820800
1238146073794949120
1238146014793605120
1238145998058381312
1238145983709614080
1238145943649898496
1238145901052547072
1238145879393079296
1238145812309344256
1238145782231920640
1238145758471360512
1238145718633840640
1238145671938670592
1238145575708753920
1238145515629490176
1238145451708252160
1238145446759084032
1238145388596658176
1238145297060114432
1238145272519196672
1238145154881650688
1238145081523056640
1238145075194060800
1238145056411987968
1238145039999676416
1238145000204128256
1238144984173309952
1238144968339984384
1238144930524119040
1238144892167208960
1238144742766129152
1238144696163188736
1238144688512737280
1238144671039307776
1238144667134418944
1238144616261705728
1238144583483228160
1238144519700393984
1238144483394543616
1238144459268857856
1238144439626981376
1238144387231764480
1238144376473374720
1238144294122401792
1238144269916999680
1238144219660902400
1238144187742158848
1238144156209483776
1238144033756786688
1238143950130724864
1238143945403772928
1238143735025762304
1238143732278591488
1238143730542051328
1238143720723296256
1238143716306624512
1238143699852365824
1238143632840036352
1238143616750620672
1238143550761717760
1238143535783739392
1238143531899924480
1238143478879490048
1238143464748900352
1238143461972480000
1238143430540345344
1238143417097564160
1238143409027719168
1238143370402414592
1238143355210645504
1238143346771742720
1238143267688062976
1238143265439965184
1238143213011156992
1238143172246716416
1238143169239408640
1238143058610475008
1238143036334452736
1238142951672426496
1238142870764302336
1238142751021174784
1238142738610171904
1238142716992774144
1238142712051904512
1238142462239084544
1238142389002342400
1238142362246840320
1238142251232120832
1238142243661365248
1238142233368551424
1238142226829471744
1238142224988344320
1238142224505896960
1238142204549398528
1238142166771404800
1238142133451862016
1238142092913692672
1238142078703538176
1238142067936759808
1238142038169784320
1238142021388427264
1238142005508702208
1238141988303785984
1238141981160878080
1238141955722358784
1238141945719017472
1238141918862770176
1238141870049497088
1238141860767584256
1238141851032412160
1238141836738220032
1238141817641668608
1238141790789779456
1238141742681071616
1238141735978573824
1238141704772947968
1238141699412512768
1238141638611996672
1238141622501519360
1238141586556551168
1238141586430545920
1238141568869109760
1238141567153647616
1238141565559865344
1238141558836338688
1238141527639162880
1238141513160409088
1238141422752141312
1238141408621420544
1238141380515504128
1238141364350717952
1238141305060032512
1238141281425121280
1238141256053768192
1238141201007738880
1238141199988535296
1238141199237541888
1238141089346998272
1238141049916329984
1238140972535623680
1238140958333521920
1238140954382684160
1238140905661571072
1238140863802478592
1238140859897479168
1238140849373851648
1238140789190000640
1238140757866881024
1238140708881600512
1238140604917387264
1238140587678801920
1238140576882667520
1238140573095268352
1238140552861888512
1238140543634456576
1238140480795402240
1238140471899295744
1238140463225270272
1238140460377337856
1238140454857846784
1238140454664687616
1238140451384963072
1238140436490977280
1238140430153404416
1238140391792271360
1238140381356797952
1238140373467348992
1238140311118938112
1238140292185960448
1238140267049304064
1238140242911248384
1238140214226239488
1238140203317047296
1238140200435548160
1238140196585005056
1238140193036587008
1238140136958951424
1238140117602258944
1238140052661829632
1238140038015262720
1238140034970198016
1238139963708932096
1238139939570794496
1238139926316642304
1238139905676460032
1238139820003725312
1238139759723253760
1238139743709401088
1238139718337847296
1238139698595405824
1238139689854308352
1238139687052685312
1238139486426542080
1238139464557514752
1238139456508563456
1238139429828558848
1238139404377624576
1238139376506474496
1238139366981206016
1238139306243510272
1238139291252985856
1238139289956990976
1238139288547704832
1238139287247499264
1238139285850775552
1238139209505890304
1238139208197459968
1238139205978656768
1238139185984409600
1238139174118739968
1238139140841054208
1238139012428304384
1238138976076210176
1238138950616825856
1238138950419701760
1238138854114238464
1238138840621203456
1238138761956986880
1238138699893727232
1238138689546416128
1238138667681689600
1238138644600406016
1238138630092226560
1238138610882404352
1238138608068018176
1238138568666689536
1238138523657687040
1238138516464381952
1238138510625947648
1238138468871667712
1238138431823372288
1238138262675488768
1238138259865309184
1238138182975344640
1238138168492396544
1238138001257041920
1238137993715748864
1238137959481839616
1238137948454957056
1238137922211192832
1238137892364566528
1238137887721472000
1238137867521720320
1238137866263429120
1238137836819361792
1238137800085704704
1238137736818757632
1238137729084424192
1238137695148232704
1238137694062026752
1238137678769553408
1238137672893444096
1238137669202448384
1238137650483277824
1238137623643852800
1238137589913321472
1238137561119428608
1238137558703452160
1238137543603957760
1238137516672405504
1238137484623728640
1238137446036058112
1238137434858295296
1238137415694499840
1238137378658635776
1238137330604675072
1238137291102654464
1238137248110919680
1238137228586614784
1238137187398451200
1238137186219896832
1238137095434067968
1238137080724754432
1238137071992221696
1238137066837458944
1238137066812256256
1238136977666555904
1238136953578688512
1238136926940598272
1238136871710056448
1238136841724821504
1238136826310901760
1238136746136817664
1238136734505996288
1238136689144614912
1238136644932382720
1238136569237815296
1238136560287019008
1238136552733184000
1238136493710901248
1238136482554052608
1238136480192761856
1238136440032288768
1238136418536308736
1238136418125389824
1238136360667500544
1238136354795634688
1238136314102505472
1238136308490534912
1238136299472728064
1238136175975641088
1238136038532485120
1238136014553722880
1238135987408187392
1238135952725467136
1238135914976530432
1238135912925728768
1238135901995307008
1238135809032798208
1238135746869055488
1238135667198173184
1238135662697754624
1238135646138531840
1238135642988707840
1238135531105472512
1238135453657825280
1238135379972296704
1238135345734090752
1238135267841781760
1238135261218865152
1238135248942256128
1238135245972606976
1238135223998537728
1238135204394471424
1238135186270945280
1238135176200368128
1238135174354939904
1238135150384254976
1238135090015854592
1238134996013125632
1238134959547781120
1238134915851485184
1238134910600298496
1238134883001733120
1238134843130740736
1238134784452202496
1238134736050180096
1238134720984203264
1238134714868928512
1238134693628989440
1238134671172567040
1238134671029891072
1238134664771981312
1238134664419827712
1238134525412196352
1238134420902752256
1238134406109450240
1238134389483200512
1238134378448015360
1238134370860503040
1238134363210088448
1238134343593312256
1238134225859162112
1238134210298359808
1238134192069840896
1238134171488280576
1238134161816162304
1238134153738178560
1238134114475282432
1238134073601798144
1238133946543636480
1238133858849218560
1238133833230417920
1238133726439256064
1238133723666829312
1238133677994975232
1238133672546574336
1238133657484877824
1238133622961582080
1238133550576271360
1238133529562800128
1238133430426222592
1238133428400390144
1238133427347394560
1238133422612262912
1238133392568397824
1238133361035616256
1238133353452318720
1238133292936781824
1238133224838135808
1238133189081804800
1238133183473946624
1238133172308709376
1238133172099076096
1238133157481697280
1238133151727267840
1238133110111420416
1238133105640321024
1238133058940932096
1238133020177117184
1238132921640386560
1238132900878573568
1238132886022299648
1238132776953614336
1238132761225039872
1238132759375294464
1238132756955238400
1238132755910864896
1238132742853988352
1238132722691977216
1238132689162645504
1238132638549970944
1238132638248054784
1238132601724047360
1238132570296070144
1238132464448671744
1238132420655882240
1238132350459969536
1238132293451091968
1238132289785094144
1238132277235810304
1238132199679016960
1238132135233454080
1238132050181468160
1238131965326430208
1238131952181379072
1238131928760451072
1238131884275597312
1238131826423664640
1238131767233490944
1238131729149366272
1238131715140464640
1238131622643298304
1238131562178326528
1238131530008010752
1238131527717982208
1238131517559275520
1238131509921538048
1238131468083306496
1238131461611454464
1238131399414222848
1238131355650682880
1238131301590405120
1238131286583246848
1238131212138545152
1238131134065709056
1238131129233944576
1238130990859649024
1238130982974349312
1238130981946744832
1238130920760193024
1238130870566785024
1238130835062169600
1238130738744213504
1238130613292535808
1238130590643183616
1238130587220602880
1238130586532880384
1238130585043898368
1238130530983370752
1238130406064418816
1238130393577967616
1238130387244720128
1238130355070173184
1238130142905581568
1238130083488989184
1238130046000193536
1238130031685238784
1238130018779348992
1238129892442755072
1238129870351339520
1238129819230941184
1238129712985042944
1238129684208070656
1238129635709206528
1238129625903087616
1238129557670150144
1238129534538584064
1238129530755338240
1238129457891868672
1238129389260455936
1238129371904266240
1238129352262529024
1238129323451785216
1238129301914083328
1238129265058643968
1238129238060007424
1238129104442056704
1238129063262400512
1238129048406106112
1238129038377529344
1238128985466441728
1238128905585819648
1238128892633853952
1238128886526947328
1238128868625485824
1238128868487290880
1238128868453519360
1238128840913883136
1238128833733287936
1238128810408792064
1238128694130028544
1238128672176869376
1238128644913909760
1238128616912773120
1238128613456838656
1238128563087433728
1238128539720912896
1238128515448537088
1238128492220465152
1238128466568019968
1238128320707006464
1238128261802139648
1238128252738244608
1238128209172008960
1238128194349338624
1238128175307206656
1238128154461507584
1238128110438055936
1238128092025061376
1238128091630886912
1238127998676750336
1238127972411899904
1238127916384423936
1238127902857875456
1238127870972760064
1238127795382992896
1238127780925227008
1238127744120209408
1238127647059857408
1238127640051175424
1238127592252850176
1238127477492527104
1238127470202716160
1238127392692023296
1238127377349332992
1238127371632275456
1238127314421997568
1238127286626349056
1238127189142523904
1238127132888489984
1238127111602397184
1238127106745421824
1238127096200904704
1238127044510257152
1238127039175147520
1238127024163762176
1238126957335736320
1238126956262154240
1238126907289481216
1238126855338831872
1238126833125728256
1238126828239425536
1238126752184111104
1238126733435572224
1238126732990918656
1238126701210673152
1238126628993105920
1238126581333266432
1238126543093796864
1238126494192410624
1238126488144273408
1238126468019994624
1238126420930506752
1238126365733339136
1238126302743482368
1238126244232822784
1238126241397555200
1238126238754955264
1238126238448803840
1238126233289818112
1238126090482266112
1238126063374471168
1238125935582478336
1238125871141183488
1238125833849573376
1238125793559150592
1238125763469115392
1238125734641545216
1238125718141362176
1238125637413400576
1238125619839479808
1238125555196649472
1238125551271006208
1238125508149166080
1238125363299041280
1238125345447923712
1238125323063037952
1238125261293486080
1238125256138686464
1238125240540114944
1238125233875410944
1238125167269855232
1238125110483017728
1238125094729404416
1238125093571555328
1238124970720493568
1238124903599087616
1238124799496519680
1238124711260893184
1238124670077018112
1238124619984523264
1238124476165787648
1238124443286806528
1238124430720712704
1238124402673422336
1238124389918441472
1238124368699547648
1238124365927141376
1238124352262098944
1238124218191151104
1238124190907207680
1238124122133221376
1238124111739707392
1238124104923799552
1238124098120822784
1238124087030853632
1238124086955372544
1238124023642492928
1238123932244459520
1238123923960672256
1238123918331990016
1238123916247392256
1238123861327126528
1238123799117213696
1238123730993156096
1238123728296435712
1238123621429714944
1238123537539297280
1238123359386419200
1238123089252188160
1238123021182910464
1238123008209891328
1238122972029890560
1238122893432754176
1238122869885784064
1238122823182409728
1238122811308343296
1238122649819234304
1238122636548255744
1238122585906274304
1238122462908383232
1238122436274634752
1238122265696448512
1238122185157476352
1238122112633561088
1238122050335780864
1238122026453413888
1238121909042151424
1238121878558048256
1238121859268382720
1238121679831724032
1238121631576440832
1238121631190585344
1238121576240988160
1238121489687359488
1238121473459589120
1238121406988087296
1238121368908070912
1238121334812495872
1238121318798811136
1238121318786064384
1238121313195130880
1238121300847210496
1238121286552805376
1238121191061237760
1238121126506749952
1238121085742260224
1238120841474424832
1238120827700285440
1238120775233581056
1238120743365496832
1238120706811891712
1238120642303660032
1238120593808977920
1238120583281418240
1238120579686961152
1238120531246841856
1238120527010705408
1238120429014913024
1238120416163573760
1238120347909664768
1238120322320252928
1238120278636535808
1238120126593077248
1238120060553695232
1238120013346856960
1238119991725248512
1238119837739728896
1238119764632973312
1238119711499522048
1238119602799824896
1238119536676737024
1238119520176390144
1238119442472730624
1238119390501052416
1238119376726962176
1238119331617296384
1238119259588497408
1238119224591241216
1238119136443748352
1238119099139592192
1238118924870397952
1238118923154980864
1238118920885805056
1238118873486036992
1238118802547752960
1238118716249747456
1238118678060769280
1238118649023664128
1238118641587171328
1238118622746357760
1238118525035839488
1238118521575485440
1238118504848666624
1238118494815862784
1238118477300469760
1238118458904190976
1238118381473103872
1238118329266638848
1238118319397494784
1238118269774696448
1238118127465988096
1238118106058407936
1238118036655177728
1238117960369221632
1238117922775556096
1238117870015590400
1238117821843980288
1238117797198209024
1238117786146267136
1238117784904704000
1238117712984805376
1238117642155757568
1238117606579671040
1238117551478943744
1238117439046483968
1238117432230735872
1238117428480995328
1238117392116523008
1238117348994924544
1238117334952194048
1238117306179485696
1238117263787593728
1238117182149705728
1238117149870370816
1238117107272990720
1238117026574536704
1238116960975482880
1238116881309093888
1238116790934343680
1238116781530722304
1238116712345513984
1238116674039054336
1238116634113474560
1238116604870897664
1238116581638619136
1238116553293320192
1238116463392821248
1238116386058260480
1238116356891070464
1238116354412216320
1238116305909297152
1238116285529145344
1238116281607471104
1238116238045466624
1238116208249049088
1238116198879047680
1238116092809224192
1238116046965334016
1238115950253178880
1238115946927206400
1238115924298924032
1238115884885041152
1238115860465713152
1238115858746130432
1238115823031660544
1238115770820972544
1238115718329139200
1238115618655739904
1238115607754821632
1238115563081269248
1238115558991769600
1238115433045200896
1238115394939912192
1238115347829534720
1238115292036960256
1238115285887938560
1238115211602792448
1238115166149017600
1238115113560932352
1238115086851588096
1238114955804790784
1238114777827704832
1238114736891453440
1238114641441587200
1238114579282083840
1238114560923643904
1238114500840009728
1238114463422787584
1238114444338741248
1238114435346108416
1238114364751859712
1238114343193063424
1238114220237033472
1238114219675004928
1238114205544390656
1238114155116232704
1238114146429865984
1238114119431012352
1238114087046991872
1238114068713668608
1238114024996376576
1238113919803297792
1238113894188679168
1238113873015771136
1238113872533491712
1238113825091727360
1238113813213392896
1238113785065373696
1238113769194246144
1238113769030549504
1238113594216194048
1238113356730503168
1238113302393147392
1238113301680308224
1238113284299141120
1238113217462837248
1238113204926062592
1238113200723410944
1238113155684990976
1238113121706926080
1238113109979598848
1238113073413660672
1238112993675796480
1238112983257174016
1238112979742117888
1238112979486457856
1238112937413193728
1238112933390974976
1238112900910395392
1238112868618375168
1238112841804255232
1238112684534628352
1238112513927131136
1238112510726688768
1238112469031301120
1238112389574332416
1238112384029470720
1238112322939260928
1238112279759118336
1238112127254016000
1238112126855757824
1238112083272753152
1238112082291314688
1238111899281129472
1238111830289113088
1238111804393492480
1238111802887737344
1238111771195572224
1238111762811101184
1238111515326197760
1238111512105009152
1238111492454703104
1238111313127264256
1238111280919166976
1238111266595627008
1238111258865516544
1238111218583457792
1238111161817747456
1238111141714247680
1238111134894489600
1238111126044450816
1238111112115228672
1238111108420034560
1238111070197342208
1238111046092668928
1238110995492585472
1238110944422768640
1238110887191482368
1238110868799438848
1238110810444107776
1238110794589655040
1238110787778088960
1238110783000719360
1238110782375804928
1238110774196875264
1238110732358758400
1238110688972869632
1238110686200369152
1238110571490357248
1238110529849380864
1238110446013612032
1238110412471762944
1238110403437215744
1238110383337951232
1238110339784413184
1238110318598983680
1238110273233276928
1238110272189009920
1238110260142854144
1238110221198901248
1238110182556741632
1238110177901101056
1238110132841721856
1238110091162931200
1238110055691702272
1238110006333050880
1238109940054667264
1238109926922338304
1238109901181743104
1238109838753837056
1238109809150513152
1238109749822046208
1238109736186384384
1238109716116619264
1238109664232996864
1238109638899445760
1238109573996740608
1238109554690396160
1238109528702550016
1238109521031151616
1238109465116901376
1238109452139724800
1238109321356955648
1238109194043166720
1238109146949521408
1238109088938110976
1238109087306522624
1238109081824616448
1238109079370895360
1238109076481028096
1238109054951710720
1238108987599380480
1238108983585636352
1238108940375855104
1238108891449262080
1238108874760019968
1238108772717015040
1238108769562824704
1238108744203956224
1238108736012591104
1238108735983190016
1238108672561156096
1238108666655621120
1238108658040541184
1238108652806037504
1238108526498766848
1238108525693468672
1238108514817540096
1238108484190605312
1238108394336276480
1238108299419099136
1238108265772433408
1238108183811547136
1238108154539499520
1238108127930847232
1238108110964883456
1238107987455197184
1238107954018160640
1238107943846862848
1238107795108638720
1238107782722850816
1238107739882237952
1238107729224273920
1238107701911191552
1238107700069883904
1238107649079738368
1238107596172808192
1238107545425846272
1238107508201402368
1238107502912380928
1238107477603840000
1238107461309120512
1238107443105759232
1238107258447450112
1238107248435625984
1238107206156984320
1238107181523886080
1238107104046714880
1238107057938501632
1238107048073723904
1238107005119840256
1238107004427816960
1238107003526012928
1238106989047107584
1238106986178154496
1238106959951409152
1238106956554014720
1238106920252329984
1238106908260798464
1238106896587948032
1238106859690553344
1238106823825252352
1238106804472754176
1238106775326527488
1238106735140839424
1238106604135837696
1238106570623340544
1238106461504516096
1238106434266595328
1238106363160477696
1238106346257555456
1238106318508081152
1238106309624545280
1238106219350503424
1238106219329576960
1238106214757695488
1238106161712431104
1238106136940773376
1238106120843071488
1238106091805904896
1238106074819018752
1238106071681679360
1238105712309436416
1238105650644881408
1238105636887560192
1238105620428935168
1238105589064126464
1238105545074249728
1238105515877707776
1238105448508768256
1238105424680947712
1238105418016206848
1238105360491298816
1238105336525004800
1238105192748515328
1238105156278988800
1238105117796249600
1238105027224485888
1238105027182571520
1238104954247806976
1238104911939846144
1238104741017604096
1238104721602338816
1238104718750052352
1238104693391360000
1238104610210004992
1238104593688596480
1238104581487411200
1238104564232060928
1238104498930962432
1238104497861341184
1238104440768512000
1238104435177463808
1238104293204348928
1238104255178801152
1238104246857449472
1238104211864399872
1238104208756428800
1238104202028687360
1238104148693966848
1238104137415512064
1238104074903605248
1238103813296439296
1238103738927194112
1238103624112209920
1238103615035695104
1238103569322127360
1238103568965603328
1238103532491939840
1238103481363431424
1238103477722722304
1238103355668475904
1238103345409253376
1238103257786040320
1238103242808188928
1238103240530591744
1238103188894552064
1238103177364492288
1238103167168139264
1238103158154563584
1238103048465063936
1238103024796565504
1238102998225731584
1238102979179360256
1238102917661540352
1238102754347941888
1238102736098467840
1238102694205829120
1238102616913186816
1238102611338952704
1238102587213107200
1238102483345510400
1238102479906263040
1238102478920527872
1238102419151732736
1238102349425541120
1238102279112228864
1238102272044908544
1238102251261931520
1238102209587535872
1238102153346125824
1238102116436185088
1238102095649218560
1238102094382579712
1238101958579216384
1238101925628911616
1238101845685481472
1238101826358018048
1238101775967825920
1238101707994865664
1238101659839893504
1238101581914144768
1238101422266294272
1238101403207438336
1238101186135216128
1238101186047336448
1238101099065769984
1238101070707998720
1238100962956308480
1238100961165361152
1238100791686299648
1238100685608148992
1238100617509441536
1238100558013235200
1238100464316624896
1238100371391819776
1238100319269269504
1238100317084016640
1238100284108349440
1238100225354543104
1238100202613100544
1238100171550064640
1238100109243670528
1238100066897985536
1238100037575507968
1238100012116185088
1238099990951665664
1238099858910859264
1238099762081075200
1238099703293771776
1238099651821064192
1238099596955586560
1238099558355402752
1238099402088230912
1238099394962116608
1238099383977152512
1238099277819400192
1238099274547826688
1238099217358430208
1238099098068230144
1238099066795540480
1238098753980116992
1238098673743077376
1238098669997412352
1238098638229962752
1238098619443666944
1238098426769870848
1238098415860547584
1238098191498739712
1238098102202097664
1238098080848842752
1238098057784209408
1238097929975386112
1238097761943400448
1238097739617054720
1238097706796617728
1238097577293250560
1238097514471055360
1238097432476606464
1238097299122737152
1238097241207762944
1238097196274388992
1238097156097085440
1238097052925558784
1238096971518353408
1238096925947133952
1238096891012878336
1238096844502204416
1238096733391007744
1238096730320785408
1238096643330801664
1238096524241973248
1238096478410809344
1238096413021687808
1238096323754196992
1238096303625850880
1238096262311927808
1238096254804074496
1238096242628050944
1238096195257618432
1238096153255780352
1238096143206076416
1238096116144578560
1238096102865297408
1238095959202000896
1238095935261085696
1238095928797491200
1238095914398433280
1238095891761938432
1238095788900626432
1238095608772210688
1238095577017012224
1238095544003813376
1238095502266302464
1238095491646345216
1238095458377105408
1238095398058831872
1238095378282659840
1238095376067985408
1238095365766811648
1238095343704772608
1238095288113348608
1238095249165123584
1238095153505669120
1238095136225198080
1238095054268518400
1238095014779129856
1238095008491847680
1238094895362887680
1238094895023140864
1238094894972846080
1238094771379470336
1238094758507134976
1238094596997091328
1238094565237719040
1238094471570415616
1238094432542625792
1238094411386454016
1238094393426444288
1238094391836839936
1238094391383744512
1238094380986249216
1238094311318794240
1238094239994654720
1238094239340343296
1238094238589554688
1238094232776249344
1238094223854927872
1238094173988728832
1238094105164431360
1238094103453274112
1238094094380998656
1238094068816564224
1238094020016066560
1238093988852359168
1238093984041402368
1238093908804087808
1238093876138819584
1238093853757853696
1238093848720683008
1238093802692153344
1238093722639794176
1238093718328168448
1238093709603897344
1238093704625295360
1238093702960222208
1238093635381596160
1238093584886370304
1238093420482170880
1238093411170779136
1238093327670677504
1238093313586024448
1238093276928004096
1238093224704540672
1238093223115046912
1238093181453033472
1238093150721323008
1238093133277265920
1238093124729286656
1238093087362211840
1238093074619863040
1238093046438400000
1238092991685971968
1238092948694237184
1238092881396523008
1238092833258524672
1238092730502348800
1238092644506615808
1238092438184407040
1238092377752993792
1238092304092524544
1238092212908494848
1238092165814902784
1238092161142460416
1238092092469108736
1238091875715817472
1238091801917034496
1238091789405491200
1238091766273912832
1238091766177374208
1238091705825538048
1238091683574800384
1238091512229085184
1238091483271528448
1238091444637904896
1238091321832886272
1238091265322999808
1238091258586791936
1238091237380456448
1238091171152494592
1238091162751315968
1238091160083718144
1238091136608030720
1238091120074088448
1238091119818235904
1238091102495944704
1238091074612142080
1238091014859935744
1238090964562055168
1238090958861996032
1238090913378959360
1238090903404908544
1238090851265523712
1238090824069545984
1238090793094729728
1238090698559193088
1238090677445177344
1238090616506023936
1238090615415623680
1238090605496086528
1238090564891037696
1238090527800729600
1238090378634551296
1238090357247594496
1238090303577427968
1238090198942089216
1238090121309716480
1238090085490470912
1238090085389799424
1238090062685966336
1238089996093009920
1238089950605840384
1238089949028716544
1238089933396508672
1238089898252533760
1238089730480275456
1238089553191276544
1238089543678648320
1238089535575203840
1238089531188002816
1238089528298135552
1238089501660061696
1238089423511846912
1238089378393722880
1238089376279736320
1238089246524739584
1238089242493849600
1238089239511867392
1238089215386234880
1238089134964604928
1238089129742630912
1238089121689526272
1238089094686806016
1238089063887974400
1238089001946537984
1238088892542152704
1238088863941152768
1238088807355944960
1238088785516249088
1238088752708321280
1238088653122998272
1238088622483673088
1238088603495837696
1238088603378413568
1238088576207904768
1238088384330887168
1238088369671979008
1238088365913722880
1238088280949895168
1238088200087797760
1238088178533367808
1238088164499165184
1238088123646709760
1238088123525091328
1238088121419431936
1238088058102263808
1238087979689586688
1238087972609839104
1238087939613220864
1238087921669935104
1238087884068052992
1238087880284594176
1238087822067843072
1238087720578285568
1238087671609798656
1238087614223310848
1238087573177806848
1238087568983498752
1238087560435466240
1238087548511100928
1238087526327504896
1238087484367605760
1238087388548812800
1238087348300075008
1238087345196466176
1238087230414966784
1238087222282219520
1238087171191508992
1238087123716247552
1238087091969540096
1238087058071191552
1238087009618493440
1238087002022699008
1238086996272091136
1238086955096825856
1238086851690401792
1238086821134901248
1238086759642169344
1238086612619313152
1238086585226162176
1238086537574846464
1238086497477197824
1238086476669177856
1238086434495627264
1238086308423139328
1238086191355961344
1238086024330428416
1238086020043657216
1238086003082002432
1238085941161582592
1238085921037221888
1238085883347316736
1238085804301283328
1238085766410113024
1238085739205873664
1238085700572020736
1238085699351568384
1238085644259405824
1238085622604140544
1238085586251988992
1238085558615842816
1238085503620132864
1238085494589833216
1238085487421804544
1238085463925235712
1238085331565473792
1238085286338461696
1238085266809794560
1238085252339433472
1238085158793854976
1238085116183838720
1238085093215920128
1238085067081203712
1238084934822178816
1238084912529408000
1238084828467064832
1238084803775299584
1238084737836744704
1238084721873235968
1238084650591010816
1238084578788511744
1238084554289745920
1238084473234894848
1238084403105947648
1238084253197402112
1238084244733333504
1238084234633494528
1238084194540060672
1238084106480730112
1238084041628418048
1238083992991281152
1238083941363519488
1238083904260759552
1238083899382792192
1238083894282510336
1238083848354791424
1238083838250602496
1238083754935156736
1238083714745339904
1238083701239578624
1238083544989253632
1238083513884315648
1238083489183956992
1238083422343639040
1238083416060502016
1238083397744037888
1238083393839136768
1238083355834449920
1238083351837360128
1238083332006481920
1238083296527081472
1238083286079098880
1238083084228218880
1238083068910600192
1238083066842636288
1238083023347875840
1238082972282224640
1238082942087376896
1238082913394143232
1238082885946691584
1238082878560448512
1238082871476326400
1238082828300169216
1238082826764861440
1238082821849317376
1238082802832162816
1238082792187211776
1238082776886321152
1238082774709477376
1238082694023499776
1238082607436480512
1238082602495508480
1238082572267257856
1238082544765145088
1238082404629147648
1238082351537819648
1238082263553802240
1238082215139049472
1238082185464295424
1238082177847394304
1238082083060428800
1238082025896185856
1238082002533965824
1238081962222518272
1238081938654670848
1238081935265746944
1238081922124763136
1238081900301946880
1238081831984979968
1238081812108201984
1238081808618541056
1238081800213336064
1238081691320815616
1238081664942776320
1238081648908021760
1238081619342344192
1238081619296215040
1238081568947781632
1238081478921093120
1238081375753863168
1238081339238334464
1238081317805240320
1238081316651855872
1238081175236890624
1238081164784656384
1238081141506281472
1238081053299965952
1238081046920466432
1238080989999611904
1238080953643421696
1238080948257918976
1238080941224013824
1238080911968624640
1238080902875484160
1238080884223467520
1238080740304261120
1238080699242086400
1238080657588277248
1238080648809775104
1238080632976297984
1238080603829997568
1238080601682579456
1238080598205399040
1238080586666967040
1238080574516072448
1238080566140047360
1238080514826928128
1238080471197790208
1238080451765506048
1238080439660797952
1238080378017062912
1238080339907575808
1238080333901451264
1238080323402887168
1238080298589585408
1238080255027527680
1238080245653176320
1238080103583711232
1238080097317466112
1238080091047047168
1238079806811574272
1238079753606832128
1238079675965960192
1238079628826337280
1238079505056452608
1238079421162151936
1238079302865846272
1238079251628339200
1238079249480847360
1238079241067155456
1238079226680684544
1238079218346373120
1238079045876711424
1238079026356531200
1238078991912841216
1238078976263950336
1238078964574367744
1238078938926264320
1238078869573373952
1238078816104452096
1238078723515129856
1238078674550865920
1238078632372899840
1238078627549503488
1238078505499283456
1238078445617209344
1238078443637608448
1238078433579667456
1238078405188476928
1238078359004905472
1238078254197755904
1238078239773466624
1238078224124522496
1238078217933795328
1238078132269301760
1238078117488414720
1238078089491615744
1238078065860845568
1238077998009630720
1238077972839620608
1238077910805811200
1238077862328111104
1238077753095786496
1238077721533714432
1238077667229884416
1238077626947960832
1238077543187546112
1238077483142045696
1238077402544312320
1238077311506939904
1238077301226475520
1238077271124201472
1238077265881313280
1238077157374640128
1238077133949452288
1238077124931534848
1238077119680446464
1238077039631986688
1238077004961812480
1238076867271417856
1238076781082611712
1238076759087689728
1238076655333081088
1238076633254330368
1238076616351375360
1238076496121679872
1238076493592477696
1238076284187455488
1238076180609335296
1238076123076067328
1238076092751253504
1238076079409172480
1238076033758191616
1238076020290285568
1238075994482847744
1238075918683430912
1238075896562581504
1238075847682207744
1238075787741298688
1238075786705473536
1238075779113779200
1238075753750597632
1238075712239734784
1238075669252358144
1238075602932060160
1238075576361062400
1238075557641891840
1238075482899460096
1238075459935637504
1238075455040819200
1238075453556035584
1238075451865735168
1238075418256818176
1238075400447823872
1238075391413280768
1238075373910233088
1238075315345403904
1238075239633993728
1238075190283771904
1238075088462843904
1238075027028762624
1238074974155485184
1238074917406433280
1238074912000139264
1238074911219998720
1238074837412823040
1238074824670564352
1238074762267484160
1238074742684311552
1238074726632873984
1238074726137954304
1238074707129163776
1238074651789705216
1238074632478973952
1238074628259696640
1238074586253733888
1238074568985714688
1238074468523634688
1238074439905898496
1238074433379733504
1238074414421475328
1238074385690484736
1238074331705618432
1238074309685510144
1238074309681111040
1238074296712527872
1238074291528310784
1238074289804455936
1238074281596276736
1238074281269047296
1238074279360692224
1238074273870368768
1238074271550902272
1238074268086407168
1238074234330628096
1238074205486407680
1238074186024857600
1238074168350048256
1238074105053827072
1238074104474894336
1238074042072141824
1238073964066373632
1238073888753496064
1238073884622061568
1238073855052099584
1238073840238018560
1238073812370980864
1238073758910500864
1238073723330101248
1238073712546648064
1238073646964334592
1238073595454058496
1238073308073152512
1238073300900773888
1238073232042774528
1238073125457330176
1238073122919759872
1238073039520247808
1238073036294758400
1238073025398018048
1238073024575873024
1238073022700978176
1238073018603245568
1238073014492827648
1238073000882327552
1238073000668344320
1238072994355970048
1238072987657666560
1238072853960052736
1238072853473484800
1238072832137068544
1238072772456144896
1238072744325021696
1238072577203089408
1238072575957368832
1238072543732551680
1238072541270466560
1238072436941156352
1238072406805221376
1238072329646768128
1238072274638471168
1238072249808064512
1238072249208287232
1238072245433622528
1238072245303427072
1238072121370251264
1238072088805736448
1238072012142084096
1238071974204780544
1238071960665497600
1238071751055007744
1238071742049984512
1238071665789227008
1238071652363063296
1238071601058525184
1238071574395121664
1238071569597022208
1238071539423158272
1238071525674188800
1238071469630001152
1238071413300285440
1238071355213561856
1238071333566574592
1238071331981164544
1238071206236106752
1238071131992657920
1238071097406435328
1238071043035709440
1238071031782199296
1238071026870878208
1238071015412039680
1238071006192951296
1238070991567368192
1238070932528381952
1238070907698061312
1238070885958979584
1238070820083314688
1238070744929538048
1238070610024181760
1238070551534374912
1238070532903505920
1238070527840878592
1238070495431491584
1238070472383901696
1238070340196225024
1238070339478962176
1238070329001545728
1238070326040420352
1238070305924546560
1238070288690135040
1238070254418497536
1238070002646945792
1238069989090848768
1238069927594078208
1238069829321527296
1238069785910337536
1238069773386350592
1238069737805889536
1238069728838479872
1238069728758894592
1238069707002875904
1238069651566977024
1238069637780209664
1238069500085284864
1238069409186529280
1238069382632390656
1238069372528275456
1238069363288223744
1238069353272270848
1238069343180726272
1238069339628154880
1238069262503350272
1238069250935402496
1238069195260203008
1238069194135973888
1238069055250186240
1238069050619637760
1238069019422461952
1238068925637758976
1238068866108063744
1238068860185726976
1238068817475051520
1238068765553655808
1238068704937730048
1238068703201198080
1238068490004815872
1238068482060816384
1238068470803099648
1238068363567321088
1238068340263960576
1238068333297184768
1238068250887495680
1238068218880761856
1238068204959924224
1238068120490631168
1238068101998051328
1238068086718099456
1238068064689762304
1238067965641326592
1238067952701841408
1238067951057633280
1238067847059947520
1238067822477131776
1238067778705293312
1238067768936857600
1238067757087952896
1238067748082798592
1238067733914218496
1238067723609034752
1238067690209710080
1238067667644198912
1238067597339504640
1238067527567192064
1238067509359710208
1238067351557304320
1238067303163584512
1238067262289895424
1238067231709442048
1238067220384628736
1238067218778337280
1238067212243607552
1238067145201909760
1238067142752374784
1238067056341286912
1238066950850428928
1238066925802074112
1238066876749668352
1238066866398081024
1238066839273574400
1238066720985812992
1238066678606581760
1238066561866436608
1238066532648968192
1238066527280271360
1238066525405417472
1238066516655894528
1238066500923281408
1238066471458058240
1238066442001616896
1238066394098470912
1238066380114706432
1238066367997317120
1238066339735932928
1238066270697705472
1238066240574324736
1238066230705225728
1238066209549139968
1238066166842695680
1238066129354063872
1238066128758411264
1238066015151575040
1238065992770695168
1238065980548550656
1238065950320033792
1238065948294361088
1238065942929772544
1238065941461848064
1238065924059607040
1238065889737572352
1238065774830518272
1238065759282176000
1238065732518326272
1238065707700625408
1238065663358402560
1238065640692486144
1238065632828166144
1238065630940663808
1238065627371384832
1238065522287218688
1238065497662357504
1238065469766209536
1238065465634799616
1238065463185285120
1238065461704757248
1238065421527461888
1238065318750236672
1238065265671319552
1238065251951796224
1238065221241012224
1238065215633121280
1238065213288693760
1238065088235528192
1238064919922331648
1238064902033596416
1238064853400649728
1238064833708191744
1238064819158355968
1238064776946814976
1238064755983765504
1238064738686439424
1238064729089859584
1238064692045795328
1238064663478370304
1238064648382971904
1238064644889153536
1238064607316578304
1238064519949279232
1238064518707720192
1238064476089397248
1238064441104764928
1238064438214877184
1238064434674794496
1238064432418377728
1238064375375843328
1238064334829322240
1238064332363067392
1238064324842860544
1238064296178966528
1238064285651255296
1238064074031869952
1238064070185684992
1238064065215377408
1238064032822759424
1238064026153697280
1238064020608798720
1238063801473339392
1238063791629373440
1238063707780874240
1238063611970535424
1238063571445088256
1238063535403433984
1238063530248744960
1238063528373780480
1238063523412021248
1238063457448099840
1238063438510915584
1238063382709833728
1238063311729700864
1238063310160920576
1238063263297961984
1238063247498129408
1238062980555833344
1238062974847369216
1238062954152681472
1238062950260379648
1238062931184508928
1238062827438571520
1238062785780748288
1238062508277145600
1238062463339429888
1238062427905949696
1238062376437628928
1238062310834479104
1238062259273859072
1238062215649013760
1238062200218140672
1238062195755421696
1238062161672507392
1238062160024154112
1238062043778908160
1238061968327671808
1238061945472901120
1238061924090347520
1238061905396334592
1238061898484125696
1238061866657746944
1238061845572976640
1238061793521610752
1238061723560620032
1238061716128378880
1238061657840136192
1238061589267447808
1238061450175729664
1238061449819422720
1238061401891123200
1238061359780245504
1238061302200832000
1238061288028323840
1238061264875720704
1238061253169381376
1238061116514762752
1238061020276547584
1238061016795226112
1238060931046875136
1238060920758308864
1238060709843316736
1238060708035780608
1238060691816407040
1238060650871640064
1238060469824499712
1238060452036456448
1238060439847817216
1238060428191825920
1238060417378734080
1238060369505116160
1238060362932551680
1238060360319537152
1238060314622640128
1238060303482523648
1238060257122889728
1238060165842132992
1238060075358568448
1238060058568613888
1238060054466584576
1238059841207312384
1238059784928182272
1238059727537311744
1238059694767443968
1238059649833693184
1238059629004951552
1238059591121997824
1238059527091732480
1238059460381335552
1238059437853519872
1238059398947393536
1238059374704316416
1238059193661370368
1238059167656620032
1238058944775553024
1238058922260529152
1238058907530072064
1238058723530113024
1238058656287072256
1238058467757260800
1238058404330893312
1238058214941495296
1238058168971857920
1238058168888016896
1238058157106237440
1238058131399282688
1238058033265152000
1238057961118892032
1238057943762944000
1238057936213114880
1238057835457646592
1238057790746361856
1238057772786335744
1238057738640461824
1238057731766059008
1238057720982523904
1238057668528480256
1238057578799804416
1238057577327534080
1238057429734166528
1238057394665656320
1238057194303549440
1238057147612762112
1238057016066805760
1238057014946942976
1238056993169997824
1238056888308305920
1238056882956308480
1238056777234726912
1238056762126843904
1238056749560627200
1238056561806843904
1238056557201539072
1238056428209913856
1238056409696272384
1238056377228169216
1238056278045253632
1238056214237503488
1238056128191311872
1238056061191557120
1238055985396228096
1238055869893480448
1238055532939935744
1238055312856420352
1238055254010351616
1238055224222404608
1238055217532452864
1238055198792155136
1238055197747920896
1238055007053688832
1238054956873273344
1238054947578687488
1238054945322123264
1238054880964739072
1238054725066637312
1238054713024634880
1238054678920753152
1238054671455006720
1238054654963003392
1238054608209141760
1238054377627119616
1238054305527140352
1238054301601275904
1238054039906107392
1238053996230774784
1238053939523829760
1238053912554266624
1238053806895706112
1238053803531874304
1238053682190733312
1238053465785380864
1238053383795326976
1238053372189650944
1238053212990701568
1238053173912272896
1238053172771467264
1238053154073296896
1238053068215914496
1238052867837214720
1238052867740545024
1238052866713096192
1238052670004494336
1238052558540808192
1238052523786866688
1238052415993032704
1238052247289946112
1238052112749084672
1238051917126946816
1238051586552651776
1238051571046457344
1238051534048559104
1238051531196264448
1238051483612053504
1238051476779552768
1238051456638468096
1238051227578990592
1238050937228361728
1238050933873029120
1238050897420263424
1238050825760436224
1238050753421377536
1238050741501095936
1238050559409741824
1238050449963565056
1238050388949045248
1238050377909633024
1238050366668902400
1238050313401229312
1238050153417891840
1238049965060079616
1238049893685563392
1238049798457937920
1238049714597134336
1238049638155980800
1238049597311733760
1238049596284133376
1238049355392675840
1238049234554769408
1238049196256538624
1238049113868046336
1238049022910267392
1238048882447339520
1238048868601933824
1238048832048508928
1238048457073594368
1238048435686846464
1238048392628011008
1238048370108690432
1238048285077594112
1238048280308862976
1238048142773424128
1238048001295351808
1238047985768058880
1238047836979200000
1238047763549519872
1238047727897972736
1238047643911192576
1238047468794687488
1238047455926763520
1238047344790319104
1238047339429781504
1238047110660083712
1238047079571820544
1238046978325569536
1238046957769236480
1238046925623947264
1238046899812392960
1238046718081589248
1238046713241165824
1238046712599588864
1238046678466342912
1238046635046907904
1238046382105202688
1238046299900928000
1238046149694623744
1238045854612754432
1238045821326721024
1238045662786224128
1238045569576316928
1238045546289467392
1238045455851945984
1238045377753952256
1238045331121672192
1238045330563833856
1238045329192177664
1238045212305473536
1238045176356122624
1238045088376332288
1238045077903011840
1238045005933142016
1238044879013449728
1238044869538525184
1238044865117765632
1238044724319203328
1238044660695740416
1238044562939162624
1238044464431747072
1238044296915419136
1238044236660068352
1238044202568577024
1238044132939051008
1238044101355896832
1238044060474126336
1238044058771210240
1238043941003395072
1238043835332247552
1238043748690472960
1238043706936168448
1238043481987260416
1238043433874468864
1238043330321285120
1238043244237389824
1238043144115142656
1238043106357981184
1238043098481074176
1238042958869475328
1238042926518763520
1238042860651515904
1238042819144622080
1238042796914860032
1238042659769315328
1238042549853585408
1238042517276372992
1238042460623982592
1238042420098588672
1238042125553618944
1238042101721464832
1238042066384498688
1238042046289465344
1238041900239724544
1238041665002225664
1238041604038053888
1238041595288616960
1238041553010151424
1238041431014551552
1238041203574288384
1238041136431759360
1238041121617588224
1238041066449879040
1238040874417901568
1238040690518417408
1238040663452790784
1238040637917683712
1238040427367989248
1238040275148308480
1238040231514906624
1238040216591532032
1238040096219312128
1238039988882702336
1238039537995177984
1238039531783360512
1238039530298658816
1238039402787504128
1238039290304700416
1238038838909509632
1238038741668765696
1238038558327189504
1238038509790924800
1238038460549812224
1238038455390740480
1238038157960110080
1238037929798311936
1238037842695258112
1238037833262252032
1238037453367369728
1238037404901986304
1238037403694030848
1238037314036740096
1238036820098609152
1238036536903512064
1238036387808641024
1238036378929135616
1238036038972592128
1238035995469234176
1238035956701319168
1238035705261146112
1238035519474458624
1238035509148102656
1238035475090341888
1238035361240092672
1238035356102123520
1238035321083830272
1238035140737105920
1238035133388730368
1238035106171928576
1238034991566766080
1238034943101583360
1238034908951519232
1238034772141670400
1238034599017476096
1238034497557245952
1238034464061546496
1238034384025870336
1238034374114729984
1238034259182604288
1238034162474307584
1238034115401785344
1238034089128624128
1238034018702168064
1238033935805939712
1238033813151854592
1238033773159161856
1238033741554929664
1238033613108711424
1238033571446697984
1238033568317820928
1238033561195773952
1238033473602027520
1238033385832034304
1238033374503043072
1238033315346735104
1238033292764557312
1238033289656406016
1238033267770544128
1238033262032719872
1238033176972480512
1238033080943669248
1238033012102742016
1238032936215162880
1238032835669307392
1238032822578958336
1238032740596973568
1238032687287488512
1238032566457950208
1238032513240571904
1238032511818743808
1238032510686236672
1238032434270216192
1238032261439787008
1238032176526041088
1238032098964975616
1238032022125326336
1238031980056330240
1238031795217739776
1238031667417223168
1238031654096076800
1238031584797822976
1238031479604641792
1238031261337337856
1238031251132596224
1238030957963165696
1238030830615789568
1238030830150324224
1238030815386382336
1238030752081760256
1238030477409292288
1238030471495180288
1238030310320812032
1238030107022745600
1238029971035230208
1238029799823749120
1238029738653954048
1238029692420206592
1238029665253670912
1238029630038212608
1238029620106137600
1238029503311630336
1238029261543522304
1238029196661645312
1238029177913331712
1238029047239712768
1238028977769332736
1238028925068066816
1238028831879049216
1238028769182408704
1238028587397152768
1238028557990887424
1238028455821946880
1238028414881234944
1238028405896933376
1238028398456385536
1238028283406581760
1238028272304357376
1238028184551112704
1238028026929131520
1238028010537791488
1238027979575312384
1238027941726035968
1238027713920761856
1238027713589493760
1238027692471132160
1238027680987123712
1238027637156708352
1238027517644230656
1238027507523190784
1238027471343235072
1238027353462210560
1238027280313704448
1238027243827404800
1238027199837384704
1238027129666842624
1238027022141718528
1238026982589231104
1238026695229112320
1238026691043262464
1238026532716711936
1238026455914893312
1238026156156354560
1238026111453454336
1238025973205000192
1238025914379796480
1238025893832011776
1238025891713814528
1238025672251133952
1238025566630150144
1238025534002454528
1238025528709394432
1238025137724829696
1238025101049761792
1238024905062572032
1238024834132647936
1238024777421463552
1238024668935868416
1238024521149489152
1238024399657349120
1238024286159413248
1238024259747876864
1238024209932193792
1238024168010125312
1238024102314737664
1238023966830161920
1238023945607151616
1238023944059244544
1238023941362454528
1238023919505940480
1238023875901845504
1238023862278914048
1238023498322378752
1238023436502351872
1238023407868010496
1238023349558603776
1238023195955023872
1238023181438345216
1238023035325526016
1238022911245639680
1238022720882905088
1238022348453765120
1238022104064425984
1238022063820091392
1238022033675620352
1238022027438510080
1238021913609408512
1238021913596907520
1238021885687971840
1238021845972070400
1238021798962192384
1238021715470323712
1238021695899947008
1238021672428376064
1238021497836326912
1238021226188193792
1238021199965364224
1238021191421624320
1238021160606019584
1238021014577123328
1238020864517369856
1238020666437382144
1238020630857080832
1238020492138864640
1238020472949944320
1238020445691052032
1238020390921932800
1238020294129799168
1238020227910307840
1238020163284480000
1238020152181968896
1238020149187424256
1238020131466477568
1238020071135629312
1238019906148265984
1238019716742086656
1238019624580440064
1238019437833457664
1238019415888797696
1238019415330959360
1238019397089767424
1238019160132599808
1238018818368290816
1238018728299724800
1238018600662740992
1238018504097329152
1238018434119667712
1238018428981727232
1238018392998785024
1238018382160691200
1238018274660691968
1238017941595185152
1238017858140925952
1238017684794683392
1238017530838556672
1238017496298504192
1238017406078865408
1238017267620773888
1238017246800166912
1238017227456217088
1238017142223556608
1238017060741025792
1238017004243529728
1238016957548498944
1238016880457076736
1238016858529263616
1238016641100738560
1238016269233897472
1238016017093230592
1238015906330091520
1238015853230161920
1238015725098487808
1238015682425630720
1238015638435704832
1238015493673562112
1238015279524790272
1238014915408953344
1238014819632111616
1238014666715979776
1238014624819105792
1238014574554734592
1238014543281803264
1238014480057065472
1238014426143502336
1238014378064195584
1238014222094778368
1238014163500351488
1238013857202933760
1238013797220089856
1238013591921418240
1238013554525167616
1238013542307188736
1238013481007357952
1238013262098075648
1238013237926354944
1238013200789995520
1238013155743346688
1238013105768038400
1238013001049026560
1238012950943805440
1238012934653005824
1238012921223020544
1238012869146562560
1238012748707045376
1238012552468140032
1238012540501676032
1238012525414924288
1238012401343180800
1238012313002803200
1238012187987214336
1238012171868606464
1238011915592511488
1238011899263893504
1238011748785049600
1238011675460108288
1238011596145750016
1238011561312165888
1238011558653054976
1238011452633444352
1238011430311358464
1238011284957863936
1238011215521222656
1238010925988245504
1238010855976927232
1238010672497274880
1238010535779561472
1238010482025533440
1238010296750542848
1238010160599138304
1238010155607916544
1238010153204690944
1238010033884954624
1238009890091577344
1238009852779257856
1238009756117278720
1238009735321772032
1238009447252803584
1238008875967819776
1238008717318279168
1238008717137723392
1238008690415996928
1238008631414657024
1238008217264967680
1238008072548859904
1238008020652548096
1238007855879311360
1238007832261189632
1238007775122219008
1238007733099487232
1238007576278827008
1238007504971485184
1238007350281285632
1238007145104175104
1238007129111506944
1238007086446870528
1238007026673946624
1238006826907639808
1238006823409594368
1238006624968536064
1238006608850010112
1238006582862057472
1238006568895098880
1238006541795688448
1238006523823108096
1238006384463163392
1238006211343200256
1238005934384914432
1238005892165120000
1238005869264039936
1238005841267249152
1238005742176698368
1238005586819768320
1238005244463730688
1238005189061136384
1238005179892539392
1238005134745055232
1238005115149103104
1238004980499562496
1238004934508978176
1238004775066763264
1238004726500700160
1238004638562914304
1238004618644209664
1238004595923668992
1238004522477326336
1238004370593243136
1238004318185254912
1238004173284741120
1238004098017841152
1238004054933946368
1238003862109401088
1238003802822725632
1238003671897530368
1238003557791662080
1238003537130541056
1238003372931854336
1238003355433172992
1238003353650593792
1238003304807923712
1238003203314237440
1238003164307025920
1238003153380966400
1238003121458053120
1238002977379684352
1238002976616329216
1238002790468902912
1238002715436908544
1238002541364801536
1238002464269512704
1238002416630579200
1238002371902439424
1238002333478522880
1238002321189220352
1238002267447418880
1238002121754230784
1238002064707338240
1238002024341336064
1238002004489879552
1238001843638132736
1238001523453382656
1238001436698365952
1238001397490163712
1238001391198756864
1238001355614289920
1238001347816878080
1238001345753501696
1238001305458622464
1238001206888292352
1238001189498707968
1238001165180317696
1238001116094185472
1238001110213775360
1238001071777353728
1238001020182990848
1238001003968020480
1238000926108971008
1238000833394028544
1238000830671880192
1238000728448200704
1238000700031791104
1238000670457892864
1238000533245493248
1238000522734514176
1238000185202151424
1238000170396082176
1238000130994946048
1238000040158863360
1238000034366570496
1237999920369582080
1237999900157042688
1237999866120265728
1237999833002041344
1237999800240369664
1237999763590713344
1237999691691851776
1237999648381509632
1237999609298866176
1237999585236262912
1237999454357241856
1237999363785400320
1237999344382545920
1237999199150583808
1237998995747639296
1237998932086517760
1237998895059415040
1237998880245125120
1237998828873187328
1237998823911407616
1237998764754784256
1237998698992488448
1237998672429924352
1237998585171415040
1237998511607734272
1237998375049531392
1237998361569038336
1237998225212108800
1237998215430950912
1237998204819574784
1237998149018570752
1237998013060132864
1237997993690894336
1237997847255154688
1237997819044061184
1237997808298360832
1237997703319162880
1237997649040560128
1237997560326950912
1237997522091757568
1237997473345335296
1237997284094345216
1237997269888139264
1237996765837697024
1237996749400051712
1237996730135859200
1237996696816123904
1237996657465229312
1237996576615870464
1237996567757455360
1237996559322750976
1237996557888356352
1237996493077766144
1237995992982700032
1237995868638392320
1237995794172542976
1237995688417308672
1237995449468039168
1237995262888509440
1237994994197200896
1237994854610866176
1237994652797743104
1237994312438173696
1237994299863769088
1237994047442169856
1237994004849012736
1237993711247785984
1237993601071710208
1237993598777524224
1237993511296925696
1237993240936288256
1237993079426002944
1237993071897427968
1237993036317155328
1237993001810563072
1237992972966227968
1237992971062013952
1237992875289444352
1237992868096217088
1237992822025977856
1237992661165830144
1237992418269630464
1237992356047134720
1237991889426579456
1237991559427129344
1237991165720477696
1237990729542242304
1237990462750777344
1237990460804796416
1237990450277109760
1237990419767496704
1237990408015073280
1237990255388549120
1237990174832898048
1237990136362733568
1237989931496210432
1237989875640496128
1237989871811284992
1237989795554607104
1237989677682081792
1237989466188460032
1237989258591457280
1237989208947666944
1237989084070432768
1237989066357923840
1237988969867964416
1237988958954344448
1237988751936090112
1237988638522310656
1237988331348058112
1237988216436715520
1237987948466929664
1237987833568083968
1237987777586872320
1237987490125897728
1237987321951088640
1237986887480029184
1237986631295971328
1237986560244682752
1237986548735508480
1237986495639826432
1237986483061116928
1237985792959619072
1237985699258937344
1237985644900519936
1237985630115823616
1237985598452850688
1237985415459557376
1237985308035043328
1237985258282217472
1237985047573135360
1237984925854257152
1237984863535464448
1237984744324956160
1237984580189249536
1237984578163347456
1237984567811702784
1237984469191098368
1237984453697261568
1237984429445992448
1237984197156864000
1237984184762851328
1237984181327499264
1237984096795664384
1237983966772301824
1237983716007464960
1237983609803292672
1237983332882923520
1237982738050740224
1237982523352907776
1237982317844598784
1237982274697609216
1237982225272094720
1237982125363621888
1237982022234075136
1237981839119101952
1237981736409149440
1237981708986843136
1237981648924200960
1237981648261533696
1237981464655953920
1237981458553241600
1237981396636848128
1237981280341577728
1237980993245470720
1237980421511499776
1237980089028993024
1237980056783163392
1237979898121031680
1237979769980907520
1237979497758105600
1237979481559744512
1237978648663089152
1237978507055116288
1237978342063616000
1237978084185378816
1237978058402992128
1237977441940856832
1237977421573390336
1237977319110631424
1237977304309084160
1237976830155653120
1237976729441972224
1237976708621484032
1237976652090671104
1237976615197392896
1237976357067321344
1237975870104424448
1237975652411871232
1237975414879875072
1237975356923092992
1237975264505675776
1237975161653116928
1237974684328583168
1237974100947206144
1237974050087018496
1237973956889632768
1237973594572853248
1237973416575205376
1237973237755039744
1237973175910027264
1237973056250765312
1237972929079623680
1237972801438355456
1237972678167810048
1237972435221114880
1237972086179561472
1237972003635621888
1237971873767530496
1237971517402533888
1237970905256677376
1237970714663112704
1237970582659989504
1237970577941553152
1237970238404063232
1237970149623369728
1237969907377037312
1237969902129917952
1237969787512209408
1237969686337290240
1237969552526327808
1237969348431659008
1237969166075920384
1237969065416720384
1237968979995627520
1237968900681158656
1237968899070521344
1237968635726974976
1237968614306824192
1237968610858958848
1237968503484940288
1237968445980934144
1237968268167708672
1237968177906290688
1237968177813958656
1237968000306864128
1237967716910161920
1237967460839481344
1237967434495164416
1237967426085683200
1237967360541118464
1237967348780404736
1237967053220229120
1237966688857067520
1237966605969129472
1237966549996244992
1237966549836840960
1237966438721347584
1237966364482166784
1237966036256927744
1237965593153765376
1237965553890779136
1237965537948258304
1237965496038748160
1237965180623097856
1237965019188510720
1237964679533793280
1237964623896137728
1237964590266363904
1237964466156785664
1237963785031344128
1237963757818482688
1237963505870843904
1237963410236563456
1237963127192522752
1237962813861068800
1237962773889527808
1237962725499834368
1237962725478850560
1237962560567009280
1237962558151131136
1237962162569506816
1237962133033254912
1237962077987155968
1237962036602003456
1237961931018944512
1237961879160487936
1237961878678183936
1237961835355287552
1237961425923878912
1237961206784286720
1237961050521128960
1237961017851883520
1237960475926765568
1237960455550906368
1237960227636600832
1237960024032346112
1237959798005682176
1237959754032369664
1237959259767181312
1237959250967658496
1237959212640198656
1237958999779061760
1237958999032487936
1237958545276055552
1237958222054449152
1237957874686582784
1237957467373436928
1237957008319537152
1237956995321225216
1237956935506255872
1237956896486637568
1237956807332593664
1237956749199622144
1237956376653189120
1237956153285341184
1237955907268427776
1237955807070863360
1237955658672041984
1237955588564254720
1237955393189380096
1237955242160873472
1237955061923315712
1237954423197814784
1237954275294273536
1237954167789977600
1237954148538163200
1237954102354530304
1237953765207986176
1237953656256790528
1237953591878377472
1237953254505529344
1237953223597494272
1237953140202315776
1237953114583564288
1237952842138296320
1237952714308341760
1237952275613696000
1237951609763557376
1237951536778575872
1237951488644780032
1237951352447385600
1237950328009416704
1237950115341635584
1237950097620496384
1237950040724963328
1237949831617769472
1237949333510766592
1237949300392386560
1237949105860530176
1237948975904444416
1237948926449397760
1237948773470330880
1237948654050254848
1237948604133842944
1237948535019986944
1237948041484591104
1237947601502298112
1237947240322412544
1237947138228789248
1237946739253862400
1237946429651300352
1237945927228219392
1237945564903456768
1237944938563637248
1237944716290859008
1237944633658724352
1237944613190504448
1237944414988668928
1237944004827910144
1237943950771716096
1237943935101800448
1237943899663912960
1237943710547169280
1237943642414878720
1237943455206309888
1237943314365575168
1237942980096466944
1237942787640905728
1237942617066950656
1237942440612384768
1237942389374767104
1237941955797176320
1237941895843610624
1237941733255593984
1237941711013363712
1237941578674483200
1237941383027187712
1237941372075880448
1237941340845019136
1237941325871362048
1237941183088902144
1237940826468225024
1237940792490106880
1237940767848611840
1237940572809236480
1237940466470932480
1237940443029086208
1237940351547015168
1237940312150085632
1237940258202738688
1237940022768095232
1237940019018567680
1237939891658321920
1237939717070602240
1237939222717157376
1237938984795246592
1237938593236049920
1237938509995847680
1237938407092957184
1237938233687891968
1237938127487942656
1237938063285932032
1237937879956914176
1237937874298900480
1237937676810178560
1237937540310552576
1237937437030129664
1237937216233410560
1237937118183337984
1237937079881011200
1237936902998810624
1237936875345608704
1237936865547825152
1237936791488847872
1237936764557254656
1237936763466846208
1237936717094518784
1237936394695315456
1237936369865035776
1237936256199188480
1237936239539556352
1237936220887339008
1237936107809095680
1237936046068895744
1237935537815572480
1237935489107275776
1237935247162892288
1237935161750237184
1237935145895759872
1237935091491328000
1237934896007401472
1237934849245065216
1237934803607080960
1237934791774830592
1237934637856546816
1237934386298753024
1237934330460041216
1237934278970724352
1237934212310880256
1237934047017472000
1237934022887497728
1237933952389824512
1237933876640649216
1237933625959690240
1237933595202813952
1237933593265086464
1237932853511389184
1237932827158740992
1237932506172841984
1237932399352328192
1237932070191726592
1237931903895793664
1237931772614238208
1237931708927918080
1237931564585140224
1237931515675398144
1237930969841229824
1237930944025288704
1237930711736147968
1237930570665078784
1237930508413210624
1237930407640825856
1237930311679225856
1237929686929375232
1237929610198867968
1237929549339353088
1237929515004743680
1237929467156353024
1237929175790436352
1237929010765520896
1237928481964593152
1237928415396794368
1237928389417283584
1237927927573958656
1237927910180175872
1237927679719964672
1237927340228796416
1237927307571937280
1237927282133446656
1237927249170649088
1237927095692480512
1237926982089871360
1237926885306380288
1237926819795316736
1237926791504728064
1237926674806775808
1237926582083358720
1237926485349957632
1237926445508427776
1237926439430901760
1237926396191748096
1237926382740672512
1237926360472932352
1237926322527260672
1237926319876452352
1237926291967479808
1237926265912508416
1237926192654753792
1237926163563057152
1237926143635775488
1237925920180039680
1237925903268753408
1237925779574378496
1237925720992727040
1237925344838955008
1237925240539398144
1237925044149309440
1237925025237348352
1237924845419220992
1237924831238078464
1237924715362054144
1237924544997810176
1237924535367634944
1237924530817024000
1237924435128135680
1237924337174405120
1237924330035720192
1237924317410684928
1237923910881923072
1237923891646873600
1237923891210846208
1237923699526782976
1237923691234656256
1237923648255614976
1237923450502516736
1237923340016181248
1237923316314365952
1237923261574533120
1237923020653711360
1237922866940633088
1237922748892098560
1237922693758017536
1237922468116836352
1237922335119867904
1237922304526397440
1237922267050455040
1237922220141248512
1237922212503597056
1237922193398321152
1237922056215371776
1237922035025641472
1237921805966274560
1237921706498568192
1237921705051316224
1237921684583256064
1237921524146941952
1237921480391962624
1237921475559952384
1237921385994792960
1237921372275441664
1237921347088547840
1237921285092474880
1237921256550301696
1237921251055882240
1237921250346962944
1237921231602683904
1237921198350069760
1237920939972624384
1237920896922390528
1237920852412264448
1237920764789047296
1237920752608788480
1237920591287443456
1237920422152241152
1237920413210025984
1237920396827033600
1237920283740246016
1237920174809862144
1237920130941833216
1237920109664055296
1237919918202462208
1237919768222420992
1237919760316346368
1237919757808041984
1237919641172881408
1237919617479303168
1237919574567206912
1237919543139299328
1237919529277284352
1237919524613238784
1237919480115859456
1237919383332290560
1237919378261319680
1237919356182503424
1237919199466598400
1237919162841927680
1237919136103178240
1237919082889924608
1237919032583602176
1237919015647010816
1237918968259567616
1237918880825303040
1237918753104359424
1237918571218403328
1237918559948263424
1237918525383217152
1237918498438778880
1237918420814962688
1237918270914789376
1237918140568240128
1237918110579130368
1237918065742020608
1237918010708578304
1237917980689760256
1237917975816134656
1237917893087514624
1237917890722050048
1237917842713894912
1237917727328796672
1237917692650115072
1237917686929207296
1237917679752642560
1237917673079660544
1237917598827847680
1237917394343014400
1237917335027167232
1237917282866737152
1237917271781228544
1237917183382093824
1237917117988524032
1237917070685339648
1237916984689528832
1237916674868813824
1237916671744098304
1237916638466334720
1237916626273607680
1237916608095490048
1237916537035636736
1237916479389159424
1237916463685611520
1237916427065217024
1237916198492389376
1237916169589440512
1237916143425179648
1237915825941643264
1237915540305465344
1237915409392656384
1237915160955805696
1237915084178911232
1237914601397813248
1237914470380339200
1237914266654650368
1237914231594536960
1237914070088470528
1237913615165984768
1237913607968440320
1237913460182265856
1237913406939844608
1237913294792515584
1237913228937592832
1237913109387284480
1237912911936454656
1237912426961604608
1237912379393896448
1237911862282342400
1237911712923295744
1237911594857832448
1237911191705411584
1237910676573749248
1237910619032035328
1237910515965403136
1237910461795852288
1237910032806809600
1237909662571233280
1237908950097502208
1237908415567081472
1237907990390476800
1237907639457087488
1237907214117060608
1237907049075208192
1237906906112356352
1237906770405851136
1237906606211223552
1237906402275987456
1237906187129061376
1237906150844248064
1237906097459081216
1237905299077562368
1237905086430482432
1237905072433942528
1237904883031912448
1237904868070703104
1237904387621572608
1237904201801334784
1237903817259311104
1237903674384322560
1237902590890803200
1237902520716050432
1237902489263001600
1237902250405584896
1237902133120253952
1237901995572432896
1237901700595421184
1237901046166343680
1237900912456282112
1237900889756594176
1237900635044843520
1237900541751185408
1237900178868273152
1237900135893471232
1237899551517724672
1237899501005705216
1237899410849185792
1237899378808868864
1237899238295531520
1237899133744226304
1237898880949182464
1237898862741696512
1237898602028109824
1237898536068341760
1237898517030395904
1237898103325220864
1237897080254771200
1237897051146338304
1237896951305248768
1237896604146757632
1237896388077219840
1237896219088781312
1237895840380760064
1237895436066861056
1237895312510865408
1237895209842667520
1237894933660323840
1237894914811105280
1237894823547301888
1237894436396216320
1237894434487820288
1237894314648166400
1237894195504766976
1237894145970069504
1237893937798381568
1237893708051169280
1237893654267609088
1237893393901969408
1237893215795044352
1237893198199975936
1237893173978038272
1237893142185013248
1237893095066230784
1237892965030232064
1237892915608735744
1237892534178889728
1237892409364606976
1237892327181389824
1237892307677876224
1237892197527080960
1237892141679964160
1237892093659377664
1237892078979305472
1237891908782837760
1237891864994279424
1237891855720775680
1237891744168955904
1237891629475749888
1237891310293372928
1237891167477305344
1237891052742336512
1237891024875225088
1237890969858535424
1237890964967972864
1237890602965954560
1237890145358991360
1237889923379687424
1237889912663232512
1237889894355070976
1237889803758104576
1237889600724451328
1237889152533721088
1237889005590478848
1237888836811640832
1237888802804256768
1237888776329785344
1237888257418915840
1237887895744032768
1237887862491639808
1237887775640137728
1237887722460569600
1237887480780619776
1237887399436288000
1237887308184965120
1237887276572528640
1237887091469463552
1237886875047608320
1237886820408492032
1237886714204418048
1237886580037046272
1237886529134968832
1237886314986561536
1237885987503484928
1237885947737325568
1237885395414605824
1237885327567515648
1237884994200039424
1237884595313373184
1237884299375853568
1237884292300042240
1237884278580449280
1237883838413627392
1237883669584412672
1237883621970567168
1237883615834329088
1237883546573746176
1237883508002975744
1237883353405239296
1237883271960092672
1237883130393944064
1237883079982600192
1237883053294280704
1237883025272107008
1237882732551622656
1237882692563111936
1237882677979537408
1237882638083526656
1237882596425494528
1237882588670251008
1237882534819577856
1237882524451266560
1237882460949508096
1237882416389214208
1237882176760209408
1237882147379113984
1237881801298677760
1237881579159994368
1237881361471430656
1237880998857072640
1237880871882874880
1237880270109327360
1237880265130692608
1237880103629025280
1237880016731439104
1237880016634966016
1237879515507879936
1237879397048184832
1237879344699027456
1237879229083090944
1237878730619412480
1237878727687548928
1237878468404228096
1237878129575596032
1237878026039439360
1237878022977421312
1237877843989688320
1237877829007622144
1237877769951793152
1237877474400161792
1237877292782637056
1237877011193856000
1237877007213408256
1237876976804745216
1237876262346969088
1237876210715131904
1237875999850631168
1237875987376828416
1237875958457094144
1237875952840929280
1237875869982445568
1237875734309269504
1237875619712495616
1237875606345232384
1237875438577266688
1237875356792582144
1237875213586452480
1237875141377265664
1237874817992294400
1237874440261664768
1237874312507355136
1237874126821285888
1237874118067769344
1237873634082844672
1237873580261556224
1237873575056404480
1237873379174055936
1237873172042543104
1237873003184001024
1237872734509518848
1237872721834303488
1237872442124537856
1237872376416616448
1237872354895654912
1237872116743041024
1237872107767259136
1237872013282136064
1237871685283561472
1237871584095830016
1237871527917268992
1237871470686003200
1237871167903371264
1237871054506414080
1237870966736171008
1237870954253959168
1237870709801512960
1237870431702409216
1237870088578990080
1237870035680391168
1237870035634229248
1237869919699480576
1237869895389286400
1237869841245065216
1237869648852353024
1237869609501376512
1237869530577162240
1237869211881312256
1237869199394893824
1237869191039832064
1237869057627439104
1237868905445687296
1237868733047005184
1237868657906028544
1237868487944462336
1237868452867530752
1237868447813349376
1237868402502299648
1237868081692561408
1237868007931535360
1237867996552388608
1237867937848889344
1237867873466384384
1237867618918207488
1237867544981037056
1237867476781694976
1237867337862316032
1237867253221097472
1237867143967821824
1237866860785229824
1237866593465462784
1237866547407769600
1237866424841818112
1237866333930307584
1237866280343834624
1237866192238305280
1237866147225067520
1237866086231470080
1237865943503499264
1237865767317549056
1237865671016321024
1237865573586890752
1237865274918842368
1237865113303969792
1237865104042905600
1237865015471788032
1237864916695932928
1237864813436387328
1237864791152025600
1237864788677537792
1237864648524754944
1237864569122353152
1237864320970579968
1237864143962509312
1237864062827913216
1237863977381580800
1237863876231749632
1237863818274848768
1237863724213350400
1237863650708189184
1237863539584282624
1237863430637273088
1237863386207010816
1237863353478832128
1237862932119080960
1237862638320635904
1237862449535045632
1237862408346980352
1237861952115724288
1237861875783593984
1237861677741363200
1237861498875023360
1237861168334553088
1237861100147707904
1237860956538953728
1237860854835499008
1237860766977527808
1237860705111437312
1237860472990232576
1237860367440609280
1237860367184748544
1237859637367463936
1237859616442048512
1237859029805756416
1237858974558351360
1237858871852462080
1237858206816153600
1237857968390995968
1237857868864352256
1237857848610000896
1237857820399169536
1237857816825618432
1237857727763771392
1237857077596479488
1237856560870645760
1237855899290456064
1237855819653242880
1237855819221422080
1237855661318270976
1237855590807826432
1237855320472338432
1237855220761161728
1237855088984514560
1237855064590397440
1237854843730923520
1237854699908259840
1237854690919890944
1237854596124438528
1237854581993824256
1237854353286823936
1237854298555338752
1237854140820144128
1237854087598624768
1237854080040439808
1237854071467335680
1237853941108363264
1237853464572522496
1237853369194049536
1237853306283794432
1237853303272140800
1237853289271590912
1237853191984697344
1237852809891966976
1237852676550885376
1237852317019340800
1237852314787971072
1237852020502974464
1237852016128356352
1237851974810255360
1237851966073499648
1237851793066831872
1237851449880539136
1237851218598178816
1237851057478234112
1237850968126980096
1237850791634808832
1237850711796285440
1237850548683997184
1237850105585102848
1237850039600312320
1237850031102791680
1237849942829355008
1237849901968449536
1237849375801409536
1237849271098998784
1237849199682547712
1237849186395017216
1237849048960233472
1237849033961402368
1237849031050530816
1237848743585538048
1237848605601349632
1237848521090322432
1237848517395152896
1237848424550039552
1237848140809555968
1237848024371478528
1237847864195178496
1237847760474263552
1237847633508462592
1237847558858231808
1237847434518122496
1237847278448074752
1237847203890089984
1237847043550273536
1237847011560316928
1237846941997752320
1237846844673101824
1237846744093700096
1237846602301075456
1237846541081047040
1237846272272293888
1237846105250922496
1237846032479694848
1237846017636098048
1237845763171872768
1237845756846866432
1237845755143962624
1237845565506904064
1237845442924175360
1237845373223227392
1237845354285948928
1237845055898935296
1237845046273044480
1237844908813119488
1237844699362123776
1237844597767733248
1237844453798240256
1237844418389925888
1237844120107810816
1237844094946168832
1237844015615062016
1237843847930974208
1237843782852206592
1237843750224711680
1237843631739785216
1237843452248748032
1237843391745908736
1237843242634248192
1237843236636381184
1237843078544625664
1237842185438900224
1237842104119775232
1237841981897752576
1237841971567136768
1237841785432358912
1237841763244490752
1237841726531932160
1237841582415466496
1237841432582348800
1237841296481382400
1237841270459879424
1237841236519555072
1237841188519989248
1237841132001742848
1237840895430414336
1237840884818792448
1237840872797908992
1237840838052339712
1237840808566386688
1237840598670835712
1237840333683044352
1237840304725614592
1237840215126863872
1237840137943302144
1237840137515491328
1237839636027691008
1237839503160520704
1237839362844491776
1237839290513555456
1237839249463889920
1237839165888200704
1237839110942986240
1237839030181605376
1237838962191785984
1237838783480913920
1237838718549078016
1237838627721433088
1237838578257997824
1237838459131383808
1237838375664660480
1237838326180143104
1237838289475862528
1237838285340196864
1237838198585376768
1237838193959075840
1237838160689868800
1237838148639453184
1237838096265146368
1237837972675928064
1237837866543329280
1237837652516192256
1237837614486618112
1237837427940573184
1237837383548223488
1237837345593925632
1237837330477711360
1237837045772451840
1237836952549892096
1237836944999976960
1237836893640773632
1237836604745678848
1237836575305859072
1237836508402507776
1237836166189252608
1237836042813800448
1237835913046212608
1237835855206678528
1237835846042169344
1237835622984843264
1237835179588231168
1237835138181951488
1237834680126193664
1237834647805079552
1237834536731529216
1237834425309814784
1237834367243870208
1237834287392538624
1237834209479147520
1237834062150041600
1237833925180805120
1237833744221962240
1237833632246571008
1237833586117464064
1237833523098247168
1237833441070264320
1237833324464418816
1237833187855945728
1237832836088057856
1237832741145784320
1237832565098250240
1237832205327642624
1237832203633033216
1237832049945280512
1237831936220987392
1237831911881363456
1237831688123711488
1237831511577169920
1237831319255687168
1237830592617644032
1237830398903713792
1237830348337221632
1237830308814368768
1237830265617166336
1237830227440566272
1237830160595984384
1237830099002626048
1237830056183037952
1237829824363692032
1237829762384461824
1237829549703835648
1237829469773148160
1237829404887109632
1237829340399833088
1237829011134451712
1237828912278900736
1237828712449613824
1237828710369296384
1237828702240747520
1237828592190599168
1237828491619557376
1237828447138770944
1237828370605453312
1237827753233330176
1237827644869300224
1237827492066365440
1237827252156608512
1237827201640218624
1237827080336945152
1237826849046237184
1237826822383034368
1237826242969305088
1237826177173278720
1237826171447975936
1237826039411335168
1237825414267109376
1237825313083494400
1237825129629057024
1237825068182487040
1237825022527508480
1237824925530042368
1237824865362731008
1237824795166867456
1237824702107791360
1237824613662384128
1237824586701574144
1237824266239987712
1237824194852896768
1237824026099228672
1237823907693985792
1237823685802803200
1237823355610378240
1237823167818760192
1237823131894628352
1237822827337744384
1237822518670569472
1237822219343953920
1237822058660278272
1237821902862856192
1237821880465330176
1237821864333975552
1237821819916296192
1237821673354801152
1237821609228087296
1237821346748432384
1237821254591303680
1237820748745576448
1237820694928515072
1237820505878671360
1237820465713823744
1237820196972376064
1237820191310000128
1237819840263569408
1237819786727481344
1237819580682141696
1237819516459024384
1237819132722241536
1237819009753427968
1237818825686515712
1237818741741752320
1237818364002787328
1237818340493553664
1237817615852212224
1237817571262562304
1237817534340005888
1237817292353867776
1237817159901995008
1237817064154378240
1237816959795953664
1237816826748235776
1237816606664818688
1237816561030828032
1237816469737660416
1237816250509729792
1237816056846180352
1237815855955824640
1237815569652596736
1237815558558453760
1237815554095882240
1237815302227804160
1237815253578153984
1237815212046237696
1237814778245967872
1237814774836137984
1237814732985380864
1237814579880697856
1237814560288980992
1237814295750160384
1237813920909402112
1237813552708120576
1237813499298041856
1237813401746841600
1237813252781899776
1237812685082853376
1237812495177433088
1237812454647910400
1237811974165221376
1237811896121806848
1237811794091085824
1237811779134033920
1237811723446386688
1237811667477635072
1237811483611979776
1237811282318950400
1237810845125500928
1237810791274946560
1237810535439257600
1237810255146430464
1237809834696769536
1237809781353533440
1237809684750491648
1237809318570774528
1237809275017162752
1237809119169523712
1237809090321092608
1237808816386965504
1237808451444752384
1237807647694491648
1237807313433628672
1237807281158291456
1237807257351532544
1237807156080107520
1237807014652362752
1237806504083939328
1237805838762422272
1237805822136238080
1237805745695047680
1237804859157409792
1237804626801541120
1237804481280184320
1237804469280215040
1237804362027732992
1237804318880923648
1237804064437567488
1237803763739561984
1237803725952970752
1237803634144002048
1237803611482198016
1237802736617426944
1237802721157275648
1237802516357820416
1237802507411361792
1237802505280589824
1237802477245923328
1237802241366487040
1237801862335782912
1237801740520452096
1237801529404465152
1237801520168566784
1237801317382250496
1237801239821332480
1237801113002414080
1237801079494119424
1237801007637200896
1237800851755790336
1237800581227560960
1237800458225356800
1237800457491435520
1237800455234863104
1237800454601560064
1237800237680529408
1237800157481140224
1237799957073100800
1237799749648101376
1237799345438720000
1237799074956554240
1237798878323396608
1237798565746966528
1237798189580730368
1237797996961697792
1237797970810191872
1237797895597891584
1237797394609319936
1237797319862636544
1237796984767033344
1237796785738964992
1237796721876500480
1237796536811163648
1237796491542114304
1237796484059254784
1237796176348381184
1237796173597102080
1237796025739460608
1237795789637746688
1237795421839331328
1237795287516798976
1237795186769567744
1237795177269538816
1237795027717427200
1237794925179265024
1237794790756016128
1237794726218211328
1237794716579749888
1237794308385918976
1237794231906971648
1237793928675557376
1237793659807887360
1237793627616817152
1237793478412820480
1237793431797235712
1237793419453444096
1237793404311961600
1237792966732849152
1237792935154003968
1237792896700403712
1237792832372518912
1237792292494139392
1237792141901955072
1237792014898532352
1237791997945098240
1237791845419233280
1237791807687319552
1237791722886889472
1237791666985205760
1237791604376731648
1237790907946041344
1237790750940766208
1237790388255064064
1237790278439686144
1237790274186854400
1237789907105370112
1237789830991486976
1237789805959942144
1237789644995117056
1237789393173336064
1237789362286407680
1237789354317221888
1237789323824693248
1237789137060716544
1237789130492387328
1237788794973302784
1237788729168855040
1237788710315479040
1237788697849925632
1237788663121051648
1237788527049441280
1237788447949099008
1237788445755543552
1237788201038774272
1237788134491987968
1237788097745760256
1237788038236909568
1237787881743224832
1237787459494096896
1237787408390705152
1237787224374218752
1237786663000006656
1237786613834539008
1237786592833687552
1237786581391609856
1237786540228718592
1237786431004835840
1237786394270896128
1237786392798941184
1237786071456534528
1237785956557697024
1237785760994123776
1237785606807326720
1237785359452221440
1237784971147968512
1237784925765603328
1237784730365579264
1237784703085744128
1237784667568439296
1237784554980675584
1237784312482856960
1237784234196156416
1237784181385637888
1237784148103888896
1237784142500311040
1237783994453897216
1237783984332914688
1237783703922839552
1237783580106985472
1237783224606228480
1237783108885323776
1237782840772718592
1237782695586996224
1237782030840213504
1237781965379682304
1237781842826158080
1237781831715602432
1237781370753122304
1237781216646049792
1237781003420209152
1237780941612945408
1237780853411000320
1237780851372457984
1237780819634262016
1237780645306400768
1237780215365087232
1237779725596196864
1237779659171004416
1237779657170333696
1237779443663413248
1237779337694400512
1237779096056332288
1237779063898435584
1237778948941066240
1237778828593856512
1237778541812625408
1237778266708226048
1237775075945910272
1237770447296409600
1237769065940127744
1237765241339088896
1237755172044058624
1237754164077309952
1237754141004517376
1237744850721636352
1237723538083250176
1237723533431787520
1237715669241810944
1237714509441257472
1237712149327290368
1237708705405288448
1237707612361240576
1237698503368941568
1237693465208786944
1237682538056806400
1237682094979067904
1237674014505676800
1237673633524469760
1237658612673150976
1237638425760555008
1237624136912048128
1237571242929975296
1237560182709735424
1237559885258084352
1237552525328277504
1237551755220549632
1237551061608452096
1237545954707820544
1237482075575537664
1237451800770424832
1237426987574136832
1237421385019994112
1237398861372678144
1237374488683167744
1237333531401097216
1237059494317883392
1237029224034308096
1237013852778369024
1236983543844175872
1236923113096515584
1236681734722371584
1236183431853334528
1235881443223470080
1235737314208493568
1235303238364258304
1235247492381343744
1235070419750682624
1235066025357520896
1234884963834658816
1238000156420669440
1238000155124621312
1237997422602788864
1237991978639323136
1237984074695725056
1237975793310896128
1237946116357918720
1237944642743570432
1237944396248645632
1237922257495887872
1237922236507607040
1237913878455091200
1237864525069598720
1237797824911118336
1237761728521240576
1237750259629113344
1237731529733763072
1237648419059052544
1237643195934097408
1237643194688344064
1237623427072004096
1237623424870010880
1237495977008754688
1237495973410045952
1237467396585095168
1237397322134241280
1237393802194604032
1237363121443856384
1237343225423126528
1237326719679229952
1237306969578299392
1237300181252497408
1237284688030396416
1237274002558574592
1237261285667917824
1237160626142642176
1237152067388493824
1237130424284876800
1237130320295546880
1237090160010874880
1237085021837479936
1237050535565381632
1237039716484042752
1237015305072738304
1237012297450582016
1236998551479021568
1236986637831163904
1236963200651812864
1236930232646381568
1236660718566440960
1236618190395813888
1236252643481157632
1236229626482966528
1236210865839329280
1236077236756733952
1236043010866958336
1235952806999162880
1235602865852301312
1235497306998206464
1235309818501623808
1235306809260376064
1235255214480846848
1235236695156633600
1235206246505967616
1235128385430413312
1234981518121951232
1234980511455444992
1234898218460205056
1234869028889358336
1234860726604500992
1234834449759531008
1234791404456439808
1234747360204349440
1238415425958031360
1238415375299207168
1238415364918312960
1238415343615426560
1238415317312905216
1238415308651663360
1238415291912278016
1238415259880378368
1238415240728961024
1238415232902533120
1238415232608829440
1238415209762562048
1238415179727212544
1238415147363950592
1238415141575720960
1238415125440323584
1238415117563428864
1238415115814350848
1238415107237036032
1238415073514795008
1238415056821501952
1238415052610457600
1238415019857117184
1238415018250645504
1238414996826025984
1238414983823835136
1238414944300744704
1238414938194022400
1238414904106909696
1238414891297341440
1238414853254967296
1238414809810468864
1238414728990527488
1238414722745106432
1238414714834690048
1238414708731977728
1238414663035039744
1238414642071953408
1238414609771573248
1238414601454321664
1238414570055761920
1238414495686389760
1238414495330062336
1238414491303329792
1238414490720514048
1238414452464267264
1238414392514895872
1238414384503730176
1238414234486177792
1238414224981966848
1238414197173739520
1238414180052537344
1238414137962704896
1238414069163589632
1238414054495899648
1238414049064497152
1238414033407086592
1238414024380833792
1238414018122940416
1238414012494168064
1238414009948307456
1238413992965668864
1238413951739838464
1238413893904601088
1238413870814973952
1238413853836410880
1238413827764617216
1238413824312688640
1238413811452960768
1238413777172824064
1238413736702083072
1238413724186226688
1238413641717698560
1238413638236614656
1238413631336972288
1238413541973131264
1238413541448826880
1238413407721668608
1238413396040650752
1238413388084117504
1238413371365523456
1238413324213198848
1238413322179010560
1238413317733040128
1238413260996706304
1238413254067552256
1238413253283209216
1238413242445201408
1238413170810683392
1238413165039439872
1238413118579052544
1238413054871732224
1238413044750958592
1238413039709368320
1238413012358184960
1238413003961307136
1238413003743039488
1238413000865992704
1238412996566822912
1238412974710239232
1238412952761319424
1238412931403939840
1238412863686848512
1238412851779383296
1238412821186129920
1238412791624630272
1238412779499016192
1238412777477353472
1238412771672326144
1238412764919537664
1238412750566588416
1238412748834377728
1238412729054093312
1238412688784527360
1238412684590231552
1238412680672751616
1238412622464090112
1238412578679914496
1238412574309470208
1238412511939932160
1238412469917429760
1238412441819787264
1238412400644313088
1238412334013517824
1238412325352361984
1238412310131204096
1238412281911918592
1238412274873831424
1238412240891584512
1238412190379638784
1238412184251699200
1238412178455175168
1238412170507038720
1238412130958938112
1238412125921558528
1238412106971500544
1238412074008657920
1238412073379528704
1238412072880418816
1238412021156249600
1238412010418733056
1238412007583481856
1238412000490926080
1238411996577447936
1238411930471223296
1238411856861106176
1238411822811811840
1238411817392750592
1238411803706736640
1238411799470505984
1238411794886144000
1238411788737273856
1238411768822669312
1238411759490338816
1238411752309751808
1238411748148838400
1238411719187316736
1238411707862716416
1238411633543630848
1238411621065728000
1238411608629575680
1238411518926106624
1238411505844043776
1238411504719986688
1238411494469091328
1238411483941351424
1238411400759767040
1238411366253260800
1238411365527588864
1238411296791543808
1238411235894464512
1238411232295751680
1238411194547032064
1238411136497864704
1238411117606637568
1238411096521871360
1238411090305916928
1238411083825721344
1238411028293201920
1238411011381755904
1238411005484359680
1238411002246463488
1238410986811318272
1238410984911523840
1238410980465487872
1238410965605068800
1238410957891817472
1238410876606128128
1238410862567751680
1238410839671128064
1238410837779533824
1238410825259536384
1238410710230749184
1238410694170742784
1238410620434894848
1238410579339030528
1238410559961419776
1238410548980649984
1238410533428174848
1238410520895655936
1238410506731507712
1238410447566618624
1238410446975250432
1238410433540820992
1238410430491525120
1238410412560764928
1238410410015035392
1238410361717612544
1238410325155815424
1238410300908548096
1238410292893290496
1238410260588756992
1238410250274738176
1238410214749110272
1238410212593278976
1238410197716123648
1238410124567420928
1238410121715142656
1238410114975109120
1238410082855026688
1238410067772391424
1238410067671764992
1238410007223382016
1238409946485657600
1238409935207071744
1238409917146357760
1238409877413859328
1238409871466397696
1238409855360053248
1238409825538670592
1238409813144547328
1238409786179321856
1238409774250840064
1238409739618353152
1238409711638196224
1238409699801866240
1238409661377703936
1238409645569474560
1238409625273339904
1238409604930965504
1238409588996739072
1238409573670805504
1238409570969583616
1238409559208792064
1238409559166930944
1238409556532789248
1238409541701832704
1238409476912435200
1238409422705131520
1238409408054427648
1238409362252668928
1238409286738489344
1238409280644136960
1238409216165122048
1238409174909943808
1238409124255318016
1238409101236998144
1238409062309679104
1238409020416851968
1238409016579166208
1238409010484781056
1238409008693813248
1238409005208346624
1238408990125629440
1238408979941900288
1238408964171132928
1238408943715696640
1238408854913900544
1238408839537385472
1238408805702131712
1238408803835666432
1238408798311788544
1238408788769636352
1238408787695992832
1238408786001477632
1238408759736782848
1238408737536258048
1238408723158020096
1238408657659924480
1238408629683998720
1238408626156568576
1238408616522264576
1238408598281162752
1238408524461301760
1238408520657223680
1238408516152504320
1238408455628754944
1238408443582693376
1238408439270965248
1238408439182876672
1238408405947232256
1238408387957833728
1238408367980326912
1238408351005831168
1238408349923721216
1238408346165641216
1238408342109933568
1238408322123890688
1238408287831429120
1238408209120915456
1238408205216239616
1238408155203276800
1238408144675577856
1238408123951591424
1238408112236892160
1238408087708381184
1238408036122857472
1238408019223986176
1238407959237070848
1238407949019725824
1238407914857140224
1238407901586259968
1238407841632751616
1238407823790354432
1238407821575819264
1238407801921253376
1238407800264503296
1238407754835824640
1238407741628170240
1238407734476890112
1238407730320289792
1238407725761081344
1238407695184605184
1238407635482927104
1238407626096021504
1238407589282660352
1238407587961253888
1238407587948670976
1238407543124303872
1238407504003911680
1238407471670140928
1238407470873219072
1238407401235234816
1238407379307368448
1238407321224712192
1238407271794737152
1238407223979708416
1238407205390516224
1238407181764001792
1238407175199961088
1238407153968390144
1238407107013226496
1238407019901698048
1238406999211225088
1238406950678925312
1238406908618383360
1238406839433338880
1238406613159084032
1238406607467360256
1238406466354151424
1238406454102630400
1238406440878047232
1238406364210307072
1238406209050476544
1238405981882572800
1238405976622940160
1238405970256109568
1238405863855075328
1238405828450844672
1238405827700162560
1238405822675398656
1238405799678001152
1238405781281804288
1238405725879222272
1238405725422043136
1238405714248433664
1238405664088690688
1238405599798464512
1238405565350645760
1238405545498984448
1238405526599405568
1238405510942142464
1238405496190746624
1238405442134511616
1238405433607557120
1238405422610092032
1238405416888958976
1238405351025885184
1238405308478881792
1238405266674257920
1238405248198348800
1238405246537347072
1238405209010900992
1238405180816793600
1238405123333853184
1238405078794543104
1238405075669856256
1238405027586326528
1238405018421772288
1238404952973811712
1238404930639183872
1238404850368438272
1238404844655915008
1238404729455214592
1238404726619807744
1238404720743591936
1238404700657106944
1238404609154129920
1238404520725618688
1238404510931988480
1238404508473913344
1238404506196590592
1238404442694836224
1238404437254815744
1238404436252184576
1238404435769995264
1238404435417518080
1238404411530940416
1238404407097778176
1238404393017446400
1238404388256911360
1238404386247901184
1238404331872927744
1238404259999297536
1238404182681554944
1238404182564102144
1238404181490360320
1238404171172323328
1238404161634332672
1238404105397288960
1238404081305227264
1238404077823893504
1238404057397710848
1238404052574261248
1238403968298094592
1238403936509407232
1238403883044499456
1238403822231465984
1238403741457539072
1238403707798200320
1238403694741225472
1238403690475794432
1238403653498810368
1238403649757478912
1238403582673580032
1238403446224515072
1238403430273691648
1238403426968571904
1238403298295779328
1238403296361984000
1238403294550245376
1238403242041790464
1238403217417011200
1238403202237808640
1238403162672939008
1238403146554187776
1238403095064973312
1238403070385684480
1238403042665512960
1238403036298596352
1238403000164474880
1238402977532129280
1238402973539106816
1238402966144647168
1238402930656624640
1238402880794775552
1238402877401509888
1238402838897672192
1238402756265816064
1238402746841206784
1238402687185694720
1238402672543309824
1238402639513223168
1238402621771317248
1238402592968978432
1238402581787017216
1238402532440932352
1238402416661454848
1238402182279553024
1238402154718728192
1238402142634901504
1238402135924117504
1238402063156908032
1238402043561336832
1238401955686428672
1238401924631875584
1238401917677682688
1238401886719561728
1238401872542785536
1238401825486888960
1238401809456091136
1238401774727372800
1238401699468972032
1238401562663362560
1238401531097026560
1238401514302889984
1238401486280949760
1238401433164304384
1238401416252850176
1238401404877881344
1238401396619304960
1238401375517782016
1238401333734096896
1238401312015908864
1238401308954157056
1238401299747442688
1238401284711034880
1238401257636859904
1238401199839358976
1238401178062467072
1238401167350267904
1238401122475401216
1238401121632366592
1238401071036448768
1238401051621052416
1238401030158716928
1238400978384310272
1238400955101646848
1238400935900188672
1238400932645408768
1238400906590408704
1238400893831217152
1238400886411530240
1238400692445995008
1238400639685844992
1238400631519490048
1238400631448223744
1238400592848007168
1238400555204202496
1238400529480527872
1238400514297155584
1238400485952012288
1238400426220949504
1238400412283211776
1238400366208667648
1238400344368877568
1238400297006923776
1238400262139777024
1238400253092679680
1238400219806564352
1238400187376250880
1238400136935596032
1238400057357066240
1238399944605736960
1238399854159597568
1238399847075581952
1238399827076984832
1238399752619712512
1238399752300949504
1238399727101710336
1238399701394894848
1238399660655620096
1238399636265512960
1238399623875694592
1238399618465107968
1238399599192289280
1238399544926203904
1238399536395100160
1238399521715093504
1238399450286096384
1238399378357923840
1238399347802492928
1238399305163001856
1238399297089163264
1238399259139072000
1238399235890073600
1238399229204344832
1238399202373373952
1238399186124574720
1238399060807233536
1238399059599253504
1238399002376384512
1238398913369059328
1238398892603068416
1238398818330316800
1238398792354930688
1238398780027932672
1238398695235825664
1238398693830778880
1238398644275068928
1238398640181428224
1238398613602082816
1238398572686688256
1238398495784153088
1238398448132595712
1238398432588574720
1238398423323336704
1238398394386673664
1238398348463308800
1238398275868295168
1238398265311272960
1238398129172611072
1238398116258140160
1238398086470422528
1238398062562811904
1238398017415372800
1238398009928540160
1238397884367863808
1238397872925806592
1238397850326904832
1238397829678272512
1238397826305904640
1238397815178625024
1238397779724001280
1238397768143720448
1238397681820733440
1238397676032528384
1238397667564310528
1238397619489177600
1238397563184840704
1238397553055617024
1238397524169216000
1238397411669807104
1238397411627872256
1238397408515633152
1238397406842163200
1238397387892088832
1238397387611258880
1238397383840579584
1238397343017418752
1238397316735926272
1238397234485637120
1238397232208109568
1238397230312194048
1238397138511572992
1238397126624849920
1238397107159121920
1238397091485036544
1238397060447117312
1238397050959605760
1238397044626202624
1238397036275384320
1238397034840952832
1238397026397716480
1238397020601233408
1238397018395066368
1238397015677186048
1238396986308677632
1238396985914404864
1238396965131517952
1238396954524205056
1238396936232800256
1238396892477710336
1238396890854518784
1238396885452197888
1238396885142048768
1238396884831670272
1238396884495912960
1238396828988641280
1238396818230312960
1238396764396412928
1238396746952294400
1238396744129556480
1238396726978977792
1238396716321292288
1238396642119876608
1238396639469019136
1238396616018706432
1238396578039201792
1238396505536499712
1238396495667195904
1238396472787382272
1238396390658715648
1238396385873006592
1238396383662690304
1238396381158494208
1238396342973747200
1238396341572829184
1238396315521998848
1238396297423486976
1238396198589005824
1238396086332600320
1238395985010790400
1238395981588320256
1238395976467075072
1238395897270218752
1238395761965948928
1238395756433866752
1238395715853877248
1238395715140845568
1238395698338566144
1238395696983822336
1238395624522948608
1238395606848147456
1238395570487615488
1238395522244845568
1238395451990294528
1238395345660309504
1238395344658010112
1238395344494432256
1238395338559352832
1238395269856755712
1238395268766273536
1238395255818518528
1238395211765764096
1238395189099737088
1238395092722946048
1238395061446025216
1238394936199991296
1238394884236681216
1238394874623414272
1238394855547641856
1238394824463613952
1238394823922667520
1238394740682489856
1238394727705305088
1238394720826675200
1238394710823223296
1238394680791961600
1238394619584327680
1238394619437690880
1238394609480290304
1238394521731432448
1238394518518534144
1238394459206942720
1238394437648162816
1238394384477040640
1238394339572637696
1238394295901716480
1238394276746313728
1238394207435395072
1238394121343156224
1238394084894609408
1238394019400634368
1238394006708445184
1238393997971914752
1238393982960513024
1238393976404705280
1238393938538631168
1238393888659746816
1238393851414544384
1238393556559171584
1238393553803304960
1238393500619739136
1238393245064998912
1238393244150648832
1238393244045770752
1238393157298995200
1238393043365085184
1238392998171475968
1238392990277795840
1238392973789986816
1238392937525854208
1238392894077177856
1238392872170409984
1238392801710297088
1238392616795787264
1238392585871396864
1238392494234222592
1238392489695838208
1238392473354993664
1238392431164436480
1238392416190763008
1238392406027845632
1238392306962698240
1238392119514951680
1238392117765890048
1238392113768722432
1238392102980972544
1238392101370503168
1238392097784369152
1238392096048001024
1238392016125546496
1238391988824743936
1238391928250654720
1238391919614574592
1238391777666781184
1238391531905654784
1238391505129213952
1238391500775530496
1238391453841346560
1238391313021767680
1238391307086770176
1238391278540226560
1238391276682256384
1238391232885411840
1238391197011492864
1238391121195290624
1238391043466440704
1238391026257018880
1238391002714472448
1238390937862184960
1238390889619378176
1238390873676828672
1238390857197326336
1238390821105344512
1238390750431371264
1238390729442873344
1238390728209784832
1238390624304300032
1238390604901556224
1238390593165778944
1238390576682340352
1238390545594093568
1238390525163601920
1238390519279030272
1238390410290044928
1238390333651791872
1238390121663168512
1238390120052674560
1238390113282985984
1238390108124073984
1238390062380797952
1238389988628168704
1238389958752096256
1238389908957519872
1238389902489812992
1238389873330937856
1238389838338023424
1238389670930612224
1238389664609951744
1238389573299761152
1238389510708310016
1238389462830284800
1238389453397340160
1238389412188299264
1238389402314911744
1238389341367328768
1238389338620100608
1238389337844154368
1238389336841715712
1238389335981846528
1238389316629528576
1238389311185260544
1238389308295438336
1238389249382236160
1238389082826264576
1238388999447773184
1238388991445123072
1238388862608695296
1238388853305679872
1238388772544356352
1238388730337079296
1238388702054944768
1238388645142376448
1238388587156119552
1238388577542733824
1238388450841296896
1238388444520484864
1238388423200833536
1238388354468601856
1238388341462069248
1238388329864970240
1238388320863948800
1238388259929182208
1238388220951515136
1238388215402258432
1238388184679145472
1238388076608655360
1238387972845772800
1238387969616199680
1238387961198252032
1238387924166721536
1238387824769957888
1238387745376153600
1238387738430386176
1238387674060394496
1238387649121001472
1238387623279898624
1238387565872312320
1238387477972430848
1238387476617666560
1238387453179973632
1238387426462220288
1238387328206290944
1238387291686604800
1238387218915491840
1238387218873491456
1238387010240274432
1238386886567231488
1238386720363560960
1238386719797510144
1238386707885506560
1238386637123588096
1238386568743866368
1238386530743398400
1238386514146537472
1238386508752658432
1238386492235345920
1238386418927337472
1238386378565615616
1238386331547467776
1238386269744496640
1238386110952353792
1238386108410535936
1238386104388239360
1238386094934286336
1238386068522704896
1238386029033381888
1238385935827578880
1238385877291872256
1238385840319016960
1238385818621927424
1238385778901676032
1238385710899417088
1238385702326411264
1238385652565237760
1238385650518368256
1238385586735546368
1238385300948291584
1238385149491937280
1238385108173938688
1238385017014927360
1238384939059404800
1238384899071062016
1238384885561208832
1238384845060886528
1238384838173958144
1238384834126454784
1238384826148745216
1238384821220462592
1238384633139601408
1238384630870560768
1238384628123103232
1238384523659878400
1238384482677391360
1238384474678792192
1238384441476571136
1238384403023310848
1238384390981455872
1238384317404983296
1238384316209455104
1238384314355605504
1238384075674505216
1238384001519439872
1238383798296801280
1238383767930224640
1238383726855364608
1238383702612283392
1238383674913144832
1238383634920493056
1238383630554103808
1238383614842130432
1238383554393976832
1238383554347905024
1238383430406041600
1238383407442231296
1238383304350543872
1238383177321910272
1238383166165078016
1238383065048760320
1238383050242904064
1238383011311296512
1238383001949442048
1238382946102456320
1238382894986473472
1238382884030996480
1238382855232737280
1238382803256930304
1238382741881794560
1238382722957086720
1238382709883441152
1238382564991172608
1238382559958048768
1238382477074259968
1238382468849455104
1238382380664135680
1238382264037175296
1238382233796427776
1238382232345153536
1238382169137065984
1238382062798663680
1238382055567904768
1238382044591185920
1238382038845177856
1238382036743675904
1238381975104258048
1238381858699837440
1238381823668957184
1238381819277402112
1238381809500598272
1238381785202880512
1238381784880087040
1238381750343983104
1238381655825489920
1238381533557293056
1238381510165749760
1238381461566304256
1238381433238028288
1238381294242988032
1238381288903630848
1238381280309522432
1238381202224095232
1238381066861322240
1238381029896810496
1238380980278300672
1238380927027490816
1238380905254866944
1238380877127790592
1238380865274642432
1238380848740798464
1238380820232110080
1238380814439788544
1238380621153656832
1238380607346016256
1238380522872676352
1238380468581564416
1238380440261742592
1238380437736689664
1238380304651386880
1238380303686631424
1238380248787488768
1238380184493076480
1238380130826776576
1238380130394877952
1238380078368796672
1238380061193113600
1238380030427873280
1238380024451026944
1238379982105255936
1238379873678262272
1238379813263548416
1238379771626688512
1238379723895513088
1238379690945056768
1238379581444366336
1238379565191495680
1238379531242811392
1238379452213624832
1238379357053366272
1238379280288993280
1238379277319647232
1238379256113238016
1238379230569922560
1238379178837360640
1238379149271728128
1238379075888123904
1238379016756830208
1238378998910066688
1238378945956937728
1238378900545298432
1238378843536338944
1238378836376649728
1238378735117553664
1238378693925494784
1238378616951418880
1238378469311909888
1238378451624767488
1238378332380631040
1238378288545964032
1238378281675743232
1238378280924770304
1238378253540302848
1238378173252993024
1238378163509624832
1238378111764316160
1238378108782329856
1238378041262444544
1238378038393475072
1238378010148921344
1238377978133954560
1238377956805947392
1238377917010317312
1238377801067237376
1238377778904530944
1238377766141165568
1238377676756451328
1238377610347855872
1238377564705624064
1238377537216094208
1238377504987140096
1238377492349673472
1238377481066987520
1238377361785204736
1238377338854707200
1238377285679329280
1238377214099537920
1238377088807124992
1238377059937931264
1238377003696263168
1238376887715430400
1238376866030981120
1238376790495805440
1238376780312043520
1238376777598279680
1238376774779707392
1238376772376440832
1238376728612888576
1238376524576948224
1238376461276459008
1238376438195040256
1238376260243521536
1238376248365154304
1238376126831038464
1238375918965600256
1238375874992295936
1238375868470374400
1238375734948872192
1238375732557934592
1238375525095288832
1238375516434051072
1238375514685018112
1238375485148508160
1238375452240011264
1238375426575269888
1238375404072771584
1238375379661803520
1238375353048903680
1238375273126600704
1238375270194741248
1238375157137321984
1238375078687117312
1238375053458313216
1238375046365753344
1238374997745336320
1238374965382127616
1238374944687284224
1238374935501975552
1238374830707224576
1238374735852994560
1238374734074544128
1238374700725739520
1238374670958649344
1238374663102910464
1238374544999682048
1238374539781963776
1238374374438100992
1238374372315934720
1238374342817452032
1238374316556849152
1238374305429204992
1238374279198183424
1238374243437408256
1238374236999147520
1238374236638654464
1238374078899269632
1238374077645099008
1238374076781133824
1238374036352184320
1238374033361702912
1238373704138133504
1238373609351122944
1238373606880677888
1238373577868574720
1238373576060866560
1238373514496765952
1238373488949329920
1238373487913209856
1238373470204985344
1238373449506177024
1238373447488565248
1238373362952527872
1238373333906964480
1238373328026509312
1238373324192911360
1238373291154272256
1238373277732667392
1238373219108823040
1238373087042768896
1238373075751706624
1238373014846066688
1238372991173623808
1238372976845881344
1238372931312529408
1238372923142025216
1238372896130633728
1238372799808524288
1238372770486116352
1238372765272395776
1238372746351894528
1238372745823637504
1238372743806058496
1238372733978894336
1238372676642770944
1238372655461531648
1238372639711866880
1238372609093337088
1238372593629122560
1238372554039078912
1238372532828454912
1238372506781835264
1238372502906253312
1238372499164987392
1238372497608839168
1238372493196431360
1238372490503696384
1238372436753764352
1238372418147815424
1238372340322299904
1238372319652974592
1238372244130336768
1238372230142128128
1238372135208443904
1238372115016900608
1238372114593394688
1238372104698986496
1238372071966756864
1238372028593438720
1238371954454913024
1238371851711262720
1238371810556739584
1238371728918708224
1238371718613393408
1238371718592204800
1238371694403653632
1238371670785736704
1238371591576260608
1238371569757454336
1238371446621159424
1238371426681401344
1238371396239024128
1238371383056510976
1238371377050267648
1238371261841104896
1238371237828497408
1238371222255263744
1238371054206234624
1238371048908886016
1238371009922830336
1238370955401068544
1238370915651551232
1238370795308625920
1238370756012228608
1238370723434987520
1238370685803728896
1238370681496240128
1238370669429219328
1238370547978964992
1238370332752388096
1238370258391412736
1238370244479066112
1238370152573546496
1238370072491700224
1238369957051633664
1238369947757281280
1238369841800773632
1238369823098355712
1238369781981622272
1238369768215805952
1238369705334697984
1238369668596994048
1238369498505400320
1238369492834693120
1238369491370811392
1238369467987570688
1238369423603441664
1238369371459858432
1238369331756634112
1238369276463140864
1238369265574727680
1238369260658921472
1238369231349006336
1238369227704320000
1238369189812822016
1238369178073079808
1238369142417358848
1238369132086734848
1238369102923812864
1238369060477374464
1238368913043230720
1238368910182944768
1238368909323120640
1238368704079040512
1238368503868067840
1238368485941657600
1238368481860554752
1238368457982443520
1238368446720675840
1238368433999314944
1238368357335863296
1238368265979736064
1238368256852926464
1238368204768100352
1238368201651695616
1238368181917548544
1238368078825525248
1238368066662260736
1238368046454013952
1238368044558188544
1238367943794163712
1238367904275533824
1238367814366498816
1238367730509795328
1238367727644966912
1238367723060711424
1238367654999724032
1238367553610592256
1238367507234328576
1238367376149790720
1238367326342393856
1238367187657732096
1238367051405766656
1238366990613577728
1238366937152802816
1238366918970683392
1238366895465693184
1238366885118390272
1238366729295867904
1238366708374667264
1238366679156973568
1238366511380729856
1238366404073545728
1238366307038486528
1238366259978178560
1238366254785855488
1238366247273799680
1238366186816933888
1238366092663435264
1238365959385231360
1238365937197297664
1238365775813120000
1238365603552841728
1238365487932813312
1238365474582339584
1238365456630796288
1238365366700642304
1238365363517128704
1238365175474008064
1238365163746623488
1238365098437214208
1238365084856070144
1238365061099315200
1238364933361893376
1238364845830897664
1238364773739376640
1238364685226971136
1238364414358650880
1238364249468043264
1238364211199213568
1238364127204179968
1238364082975236096
1238363938384941056
1238363917186891776
1238363897318363136
1238363841081335808
1238363772986802176
1238363767588749312
1238363749863567360
1238363748609544192
1238363745862266880
1238363697090879488
1238363488902426624
1238363408703131648
1238363282609778688
1238363258794328064
1238363228792664064
1238363179496943616
1238363044746493952
1238363026983706624
1238362926366568448
1238362917587816448
1238362910612582400
1238362601307934720
1238362562498002944
1238362524262809600
1238362518080204800
1238362473289461760
1238362293521399808
1238362284226994176
1238362258171924480
1238362183790211072
1238362049727496192
1238362045193437184
1238362039455641600
1238362013069385728
1238361981205114880
1238361950440099840
1238361858555424768
1238361765945257984
1238361705857593344
1238361641118564352
1238361578711347200
1238361541403017216
1238361533366685696
1238361418929451008
1238361397634969600
1238361303909097472
1238361232052289536
1238361231750242304
1238361127496478720
1238361023792525312
1238360763267461120
1238360656790695936
1238360653502480384
1238360548225568768
1238360532400431104
1238360522665250816
1238360486040698880
1238360415647588352
1238360402058190848
1238360401689051136
1238360298400231424
1238360248630591488
1238360248571879424
1238360203864821760
1238360202249940992
1238360174299152384
1238360170343825408
1238360126236524544
1238360065138200576
1238359959919828992
1238359948507004928
1238359945961254912
1238359920774467584
1238359902013161472
1238359835860754432
1238359815102971904
1238359760631730176
1238359757590794240
1238359721393807360
1238359708668506112
1238359655140798464
1238359629836550144
1238359546386690048
1238359531639508992
1238359525519814656
1238359486802296832
1238359387397373952
1238359268597866496
1238359230912045056
1238359228206723072
1238359149836218368
1238359136930164736
1238359135600562176
1238359095490551808
1238359081468887040
1238359066956705792
1238359064297512960
1238359048715735040
1238358771296079872
1238358713217495040
1238358547236339712
1238358516689076224
1238358515455950848
1238358497395384320
1238358423957364736
1238358209557147648
1238358206952464384
1238358177974046720
1238358102258397184
1238358054103441408
1238358040031698944
1238357892941500416
1238357864101666816
1238357800708968448
1238357754080878592
1238357620265635840
1238357595779293184
1238357525357002752
1238357516691615744
1238357304199778304
1238357171965956096
1238357110670405632
1238357069700333568
1238356760949395456
1238356630070128640
1238356618997379072
1238356450650607616
1238356376394575872
1238356358275248128
1238356266390622208
1238356214624501760
1238356179308482560
1238356042850775040
1238356023322255360
1238355887514734592
1238355866476142592
1238355864114864128
1238355854220460032
1238355851729080320
1238355834360356864
1238355704400003072
1238355584501592064
1238355557045723136
1238355538183847936
1238355519624134656
1238355258075561984
1238355221731934208
1238355016911474688
1238355013107355648
1238354953422462976
1238354947873230848
1238354904323739648
1238354831112392704
1238354690997436416
1238354605852905472
1238354521706958848
1238354435618766848
1238354337304326144
1238354319121866752
1238354144173461504
1238354035779842048
1238354013176975360
1238354009049702400
1238353850777636864
1238353709970722816
1238353618593550336
1238353615078567936
1238353551161798656
1238353546065707008
1238353355317149696
1238353254762889216
1238353154216951808
1238352896565092352
1238352806035238912
1238352611692007424
1238352470625173504
1238352467781464064
1238352404694716416
1238351943514198016
1238351908353593344
1238351872408182784
1238351735032340480
1238351732243075072
1238351682855198720
1238351587392786432
1238351586038030336
1238351586008748032
1238351585954144256
1238351585840975872
1238351436947259392
1238351304134504448
1238351068981088256
1238351049611718656
1238350908649594880
1238350892887420928
1238350890848923648
1238350714025492480
1238350710858792960
1238350611604701184
1238350555321335808
1238350363301838848
1238350352577187840
1238350301351956480
1238350245613973504
1238350228278980608
1238350211988275200
1238350210524278784
1238350120548270080
1238350017103941632
1238349836606418944
1238349758017736704
1238349666028122112
1238349648944926720
1238349638228377600
1238349213991350272
1238349084261564416
1238349040456273920
1238348959745069056
1238348897262563328
1238348780438720512
1238348770963787776
1238348747635134464
1238348712604241920
1238348549705863168
1238348481514872832
1238348406059421696
1238348169672605696
1238348084192706560
1238347857616351232
1238347846446915584
1238347831322324992
1238347813093879808
1238347701890117632
1238347688292290560
1238347400655147008
1238347352613814272
1238347343860301824
1238347149286481920
1238347014213001216
1238346993770074112
1238346968784609280
1238346939692756992
1238346913398894592
1238346912224497664
1238346681168642048
1238346642044137472
1238346614437285888
1238346542257504256
1238346541766594560
1238346116262846464
1238346115117916160
1238346066640039936
1238346012416081920
1238345960067039232
1238345881453301760
1238345860481572864
1238345774519517184
1238345552875720704
1238345304211992576
1238345088457195520
1238344927047630848
1238344925768380416
1238344869703188480
1238344822110531584
1238344818679570432
1238344737372979200
1238344539691192320
1238344501246038016
1238344197045915648
1238344195208671232
1238344188615372800
1238344098051956736
1238344097284468736
1238344096508502016
1238344037683335168
1238344037159047168
1238344036949340160
1238344036211032064
1238343863321767936
1238343787417567232
1238343774029348864
1238343218024140800
1238343088885518336
1238342895591141376
1238342777026600960
1238342739315412992
1238342612421140480
1238342386482323456
1238342374490693632
1238342370736865280
1238342355305955328
1238342097217957888
1238341981916532736
1238341777762877440
1238341774835359744
1238341422987673600
1238340915057561600
1238340739240620032
1238340293776117760
1238340013902794752
1238339941265887232
1238339596670267392
1238339531763585024
1238339339572203520
1238339305757540352
1238339291123679232
1238339049414426624
1238338967138795520
1238338693611442176
1238338463067328512
1238338452061470720
1238338259735859200
1238338037668556800
1238337868117901312
1238337854255910912
1238337852468948992
1238337825122156544
1238337754938867712
1238337398326599680
1238337272363220992
1238337153245024256
1238337007979503616
1238336852408651776
1238336790425149440
1238336691720474624
1238336500942532608
1238336486748983296
1238336431225016320
1238336267542200320
1238336146708615168
1238336081554067456
1238335699398676480
1238335623578214400
1238335183209840640
1238335136699043840
1238335048077774848
1238334930376994816
1238334874810871808
1238334832037343232
1238334781835878400
1238334736235290624
1238334587966754816
1238334506148470784
1238334434652426240
1238334191542194176
1238333994392903680
1238333861525966848
1238333847126904832
1238333747528949760
1238333664879972352
1238333378467778560
1238333240429158400
1238333045272264704
1238332950585970688
1238332854645522432
1238332719211393024
1238332711552483328
1238332504114900992
1238332231430680576
1238332033857753088
1238331915784118272
1238331820703440896
1238331663328768000
1238331546345574400
1238331488845905920
1238331327838957568
1238331184842760192
1238331166001897472
1238331147580399616
1238330888540192768
1238330685577760768
1238330671556411392
1238330552689647616
1238330511396933632
1238330260992790528
1238330211403362304
1238330198392782848
1238329942590525440
1238329675627331584
1238329520731697152
1238329256855457792
1238329148432625664
1238328962629144576
1238328938159579136
1238328937383702528
1238328929863204864
1238328713143635968
1238328705346228224
1238328655685668864
1238328349375619072
1238328332070137856
1238328183553953792
1238328171105263616
1238328119876038656
1238328003827884032
1238327983066304512
1238327982961446912
1238327937557921792
1238327856486404096
1238327795249377280
1238327781370421248
1238327571886100480
1238327565070336000
1238327367434723328
1238327130133368832
1238327061715890176
1238326964559187968
1238326927091523584
1238326688754233344
1238325854742220800
1238325706737811456
1238325522062397440
1238325380886474752
1238325296132059136
1238325217593896960
1238325098630787072
1238324890605768704
1238324408462143488
1238324389868982272
1238324274391183360
1238324081633546240
1238323984275562496
1238323918798110720
1238323888364363776
1238323790041337856
1238323436398788608
1238322903831150592
1238322873934024704
1238322859782500352
1238322824739057664
1238322689695252480
1238322674566418432
1238322653217394688
1238322520576552960
1238322413978468352
1238322141990281216
1238322081508528128
1238321999279271936
1238321902566830080
1238321744852717568
1238321717631729664
1238321707796103168
1238321638623473664
1238321601025691648
1238321461409931264
1238321443601092608
1238321436768567296
1238321436760117248
1238321387057475584
1238321376936644608
1238321169050165248
1238321026762588160
1238321009884831744
1238320904460959744
1238320416000602112
1238320332072611840
1238320243103039488
1238320158923321344
1238320149981278208
1238320148190298112
1238320027146661888
1238319956942442496
1238319770027655168
1238319601852780544
1238319593774612480
1238319557170933760
1238319550724288512
1238319490842218496
1238319437930872832
1238319428543975424
1238319412488228864
1238319344754593792
1238319200755748864
1238319124692041728
1238319122154491904
1238319092081266688
1238318943141425152
1238318917937852416
1238318874367537152
1238318861734174720
1238318734789324800
1238318329963544576
1238318235918962688
1238318149549907968
1238318084118573056
1238317942430973952
1238317728613584896
1238317698754523136
1238317665925468160
1238317612175462400
1238317535075827712
1238317476968103936
1238317311875903488
1238317237641121792
1238317155114004480
1238316636815233024
1238316339380379648
1238316087042768896
1238316084186546176
1238315982751481856
1238315933279514624
1238315588184915968
1238315053587124224
1238314607208513536
1238314430993027072
1238314404350959616
1238314268291780608
1238314023784861696
1238313991346126848
1238313958458765312
1238313895057453056
1238313881874939904
1238313859976499200
1238313588550512640
1238313536159391744
1238313383121870848
1238313327849168896
1238313044666486784
1238312668928278528
1238312658002034688
1238312312135544832
1238312194699378688
1238312153024811008
1238312113493307392
1238312066479353856
1238311883800788992
1238311821846515712
1238311665650860032
1238311487044640768
1238311352491372544
1238311334309060608
1238311094407647232
1238311047972470784
1238310565635690496
1238310458689544192
1238310434308055040
1238309947101687808
1238309808203161600
1238309376772804608
1238308899352006656
1238308883879333888
1238308837209317376
1238308554135572480
1238308377337442304
1238308189201817600
1238308149171453952
1238308138886918144
1238308134663438336
1238307887148961792
1238307876885737472
1238307860221775872
1238307714243182592
1238307686665654272
1238307449821466624
1238307446008905728
1238307413272547328
1238307396721803264
1238307087610007552
1238307054676295680
1238307042458316800
1238306806620983296
1238306728753557504
1238306706800570368
1238306592531111936
1238306556942249984
1238306330965733376
1238306226485596160
1238306012848930816
1238306006284865536
1238305833659723776
1238305791859286016
1238305571591331840
1238305560723894272
1238305556257026048
1238305525617623040
1238305519036583936
1238305463084728320
1238305445393162240
1238305426535354368
1238305422886330368
1238305085677096960
1238305085135831040
1238305065514848256
1238305029171249152
1238305029087350784
1238304990457786368
1238304886724251648
1238304746315960320
1238304739403726848
1238304574097764352
1238304511854137344
1238304494883966976
1238304323395698688
1238304298402041856
1238304056591831040
1238303880062140416
1238303593007943680
1238303515631448064
1238303424900284416
1238303343212199936
1238303324002226176
1238303280607846400
1238303268645646336
1238303223922012160
1238303112688889856
1238302934992949248
1238302650690670592
1238302627173031936
1238302550086029312
1238302522822942720
1238302473753956352
1238302465038016512
1238302367130378240
1238302268946079744
1238301752069197824
1238301707110510592
1238301662411980800
1238301528257069056
1238301349462323200
1238300681519448064
1238300576577802240
1238300284889321472
1238300248843456512
1238299855253987328
1238299837071835136
1238299739306614784
1238299594326327296
1238299510218121216
1238299508083249152
1238299478483968000
1238299464416165888
1238299278344216576
1238299267313184768
1238299046013526016
1238298978883698688
1238298909157380096
1238298738663120896
1238298619393871872
1238298613111033856
1238298608790679552
1238298597541756928
1238298529388519424
1238298220490448896
1238298165113044992
1238298161451536384
1238298120015904768
1238298101200404480
1238297878658859008
1238297570142588928
1238297554560987136
1238297514689867776
1238297505567100928
1238297407617712128
1238297325946253312
1238297114326818816
1238297077332865024
1238297071859322880
1238296983661621248
1238296978779447296
1238296807865638912
1238296659584524288
1238296615825190912
1238296085162008576
1238296005944258560
1238295889052962816
1238295849332953088
1238295822485164032
1238295751517769728
1238295515403448320
1238295489721892864
1238295436059987968
1238295402673246208
1238295362353455104
1238295293650763776
1238295240311803904
1238295146707529728
1238295079216746496
1238294986657013760
1238294770994176000
1238294638265610240
1238294580484767744
1238294385101377536
1238294313391529984
1238294091676504064
1238293975565467648
1238293959346212864
1238293763635712000
1238293664687742976
1238293644043411456
1238293322872979456
1238293170498109440
1238292998531756032
1238292988981280768
1238292847482351616
1238292726338203648
1238292627868483584
1238292478383591424
1238292423316508672
1238292319893196800
1238292302562340864
1238292280894767104
1238292084953690112
1238291973674541056
1238291959032274944
1238291781399089152
1238291765976760320
1238291691393527808
1238291677862912000
1238291587794378752
1238291501974765568
1238291410425729024
1238291225192435712
1238290986251563008
1238290760837062656
1238290678934839296
1238290664355479552
1238290622504673280
1238290602367860736
1238290584671932416
1238290527818219520
1238290523338821632
1238290501884874752
1238290490623213568
1238290267544915968
1238290228944801792
1238290191241994240
1238289874819534848
1238289865114075136
1238289590256988160
1238289455422767104
1238289307162628096
1238289300447526912
1238289218583044096
1238289208772608000
1238289012307234816
1238288951892414464
1238288575398985728
1238288569275486208
1238288538652692480
1238288531996446720
1238288462069014528
1238288461720887296
1238288368334602240
1238288339771555840
1238288245206790144
1238288191267819520
1238288112595267584
1238288071680045056
1238288049739649024
1238288033184657408
1238287934123413504
1238287842876456960
1238287838350893056
1238287832462090240
1238287730586468352
1238287675687194624
1238287606078754816
1238287233938939904
1238287174874906624
1238287118415179776
1238287049565839360
1238287039923212288
1238287020377681920
1238287019840856064
1238286992917426176
1238286832007340032
1238286784066277376
1238286768262148096
1238286720992292864
1238286688020885504
1238286675131813888
1238286604025946112
1238286572245544960
1238286532731117568
1238286435381207040
1238286345426124800
1238286335649210368
1238286137937952768
1238286047336894464
1238285954269335552
1238285873206169600
1238285751491727360
1238285625414967296
1238285521241194496
1238285492103319552
1238285486449451008
1238285399811743744
1238285337912279040
1238285245780295680
1238285186854354944
1238285175986868224
1238285069095141376
1238284782825439232
1238284781693161472
1238284721525751808
1238284714198224896
1238284673014431744
1238284669914931200
1238284664567185408
1238284663665410048
1238284662851735552
1238284569763360768
1238284489253683200
1238284431380615168
1238284205936631808
1238284205576118272
1238284012021354496
1238283968224432128
1238283876037844992
1238283859428380672
1238283795650011136
1238283748153667584
1238283705287761920
1238283639722594304
1238283549251457024
1238283532553711616
1238283246561001472
1238283158262513664
1238283150523920384
1238283019707764736
1238283005661249536
1238282945477128192
1238282678316630016
1238282586339803136
1238282369393516544
1238282084445310976
1238282020360519680
1238281752583393280
1238281743779627008
1238281594646872064
1238281476535398400
1238281450673319936
1238281278971052032
1238281260851658752
1238281248713342976
1238281234553483264
1238281072971931648
1238281035667955712
1238281017842184192
1238280927761043456
1238280813235470336
1238280783133118464
1238280726786781184
1238280716712120320
1238280680003358720
1238280511476416512
1238280454769442816
1238280378575659008
1238280324985094144
1238280285025796096
1238280168634028032
1238279855206064128
1238279497687773184
1238279353655590912
1238279310307463168
1238279306490654720
1238279141817905152
1238279085912031232
1238279073912229888
1238279015078780928
1238278904504176640
1238278884342325248
1238278731279392768
1238278619543339008
1238278451259494400
1238278113408118784
1238278097528426496
1238278076049420288
1238278073071669248
1238278031363338240
1238277496316948480
1238277491359281152
1238277368579592192
1238277171149504512
1238277106561409024
1238276991708733440
1238276855750430720
1238276771398791168
1238276675110133760
[truncated: 1,985,061 more chars]
