# Supplementary material for: The Impact of COVID-19 on Sport in Twitter: A Quantitative and Qualitative Content Analysis
Source: Int J Environ Res Public Health. 2021 Apr 25;18(9):4554. doi: 10.3390/ijerph18094554 (PMC8123335; doi:10.3390/ijerph18094554)
Supplement: Supplementary file 1 [file ijerph-18-04554-s001.zip › Table S1_ngrams.xlsx]

## Sheet: uni-gram
Word	Count
coronavirus	57482
sport	32232
league	10346
covid-19	9552
football	7754
player	7441
due	7040
season	6164
premier	5945
club	5860
cancel	5409
news	5324
test	5280
pandemic	5259
postpone	5240
game	4927
amid	4378
take	4300
crisis	4151
olympic	3939
play	3922
bbc	3894
get	3821
world	3612
2020	3597
positive	3493
amp	3467
fan	3435
outbreak	3307
suspend	3290
help	3226
covid19	3177
time	3118
event	3101
make	3099
new	3074
star	3032
live	2975
close	2973
late	2954
lockdown	2853
team	2706
plan	2695
call	2600
people	2550
good	2504
return	2497
off	2491
fear	2437
update	2407
liverpool	2388
staff	2360
fight	2346
just	2333
tokyo	2307
impact	2277
race	2275
rugby	2258
match	2219
set	2198
pay	2195
back	2181
cut	2172
first	2141
like	2018
day	1993
behind	1973
man	1968
unite	1948
city	1909
ahead	1906
train	1896
week	1889
year	1829
look	1814
door	1802
break	1802
think	1797
home	1773
face	1733
chief	1719
next	1718
athlete	1714
england	1711
government	1709
need	1698
italy	1667
come	1661
decision	1649
against	1648
grand	1622
still	1614
arsenal	1612
despite	1574
champion	1560
hit	1560
open	1559
end	1546
why	1532
health	1530
talk	1525
down	1521
work	1495
keep	1472
know	1470
great	1462
show	1462
follow	1460
two	1460
support	1457
affect	1455
die	1438
continue	1434
hold	1420
boss	1407
meet	1383
confirm	1376
tennis	1369
big	1368
announce	1345
efl	1337
put	1336
australian	1334
today	1327
virus	1321
start	1307
cricket	1304
national	1291
watch	1291
read	1290
stay	1288
spread	1283
former	1283
coach	1279
april	1264
give	1262
ban	1256
prix	1243
well	1240
story	1208
concern	1200
thing	1199
leave	1193
wage	1193
tell	1191
covid	1189
nation	1188
contract	1188
even	1187
six	1180
say	1173
stop	1162
life	1159
every	1155
place	1151
reveal	1146
month	1124
uefa	1120
report	1119
cup	1115
manchester	1104
nrl	1103
shutdown	1099
way	1097
become	1090
force	1087
nba	1083
right	1072
financial	1068
tour	1067
manager	1067
donate	1050
last	1049
community	1042
title	1040
euro	1037
hospital	1033
case	1031
many	1017
fund	1005
golf	994
hope	987
footballer	985
championship	984
top	984
member	981
delay	980
thank	977
major	971
full	961
three	957
afl	952
president	947
shut	938
real	935
far	932
around	931
fixture	926
happen	926
issue	924
quarantine	905
miss	904
australia	897
include	897
ufc	896
legend	896
ask	890
chelsea	886
ireland	878
feel	878
really	878
million	877
formula	869
change	868
serie	859
leeds	856
please	854
2021	854
move	843
suspension	842
discuss	839
warn	839
minister	827
stadium	825
response	823
resume	823
transfer	809
mean	805
country	805
lose	799
global	794
join	794
school	785
restart	785
arteta	781
lead	776
future	770
see	769
agree	765
juventus	764
madrid	764
money	764
win	763
postponement	760
business	759
finish	757
medium	750
run	750
weekend	748
love	747
find	747
another	740
international	739
social	738
symptom	738
contact	734
consider	727
activity	726
measure	723
statement	722
summer	720
message	715
question	715
family	709
mikel	707
post	706
wale	704
interest	702
online	700
march	699
risk	699
death	698
send	696
rule	695
speak	694
important	694
advice	693
article	693
owner	689
public	688
remain	686
free	686
scottish	683
final	683
cancellation	681
long	677
forest	676
least	675
again	674
daily	674
try	672
travel	671
part	670
state	668
urge	667
expect	666
early	665
battle	663
may	661
allow	659
threat	655
hand	654
tournament	654
emergency	652
complete	651
soccer	645
deal	643
schedule	635
italian	635
corona	635
date	634
situation	633
english	633
professional	630
london	629
gary	627
local	626
action	625
claim	623
scotland	621
box	621
bad	620
chairman	618
cheltenham	617
video	613
south	612
furlough	609
bring	607
utd	604
competition	601
noticias	600
turn	598
tottenham	597
challenge	596
wimbledon	595
fifa	593
away	592
clash	585
trump	581
current	580
france	578
release	578
cause	578
west	574
barcelona	573
head	572
isolation	570
british	569
self-isolation	567
ioc	566
spring	564
want	562
decide	560
super	560
provide	555
believe	553
june	553
result	551
halt	549
never	547
mailonline	545
number	543
lot	540
china	539
raise	538
japan	536
doubt	535
already	532
european	532
effect	532
launch	531
via	529
everyone	526
wait	525
extend	523
ranger	522
offer	519
huge	518
four	515
together	510
hard	510
prepare	509
stand	509
check	509
women's	508
worry	504
lfc	504
yet	501
admit	499
bite	496
squad	494
worker	492
nffc	492
sky	491
red	485
host	482
official	482
few	482
bitcoi	481
mask	478
relief	478
ronaldo	477
safe	475
morning	474
europa	471
share	471
per	469
key	467
care	464
here's	462
french	460
save	460
ncaa	459
step	457
five	455
bbcsport	455
captain	453
notice	452
medical	449
void	449
festival	447
organiser	446
idea	446
information	446
horse	445
nottingham	444
exclusive	443
spanish	443
distance	443
kenny	441
soon	440
irish	440
body	437
basketball	436
restriction	434
fuck	434
seem	434
hear	431
side	431
age	431
chance	426
guardian	425
spain	422
hotel	420
marathon	419
celtic	418
norman	417
mufc	416
catch	413
point	413
forward	413
slam	411
neville	411
let	411
likely	411
available	409
mail	409
cost	409
survive	409
same	408
chaos	407
ever	404
hunter	404
high	401
series	401
bundesliga	401
old	399
struggle	399
write	398
hour	397
among	396
pep	395
light	393
bet	393
recover	393
ready	391
level	391
mclaren	391
park	390
lewis	388
second	387
baseball	385
special	384
sure	384
sign	383
driver	382
virtual	382
dalglish	381
everything	380
anthony	380
possible	379
salary	378
jam	378
industry	375
there's	375
physical	374
insist	373
europe	373
covidー19	372
hamilton	372
expert	371
order	370
heart	370
begin	369
july	368
link	366
ticket	366
empty	365
regard	365
something	365
white	364
rest	364
cristiano	363
grow	362
list	360
mental	360
charity	360
anyone	359
inter	358
town	358
detail	357
own	356
push	356
active	354
podcast	354
night	352
executive	351
committee	351
line	348
centre	347
package	347
newcastle	346
authority	345
course	345
saturday	345
premiership	344
sir	344
group	342
matter	342
option	341
donation	340
sad	339
stage	338
accord	337
declare	337
round	336
everton	336
cent	335
campaign	335
service	335
klopp	334
county	334
indefinitely	334
stokecity	334
association	333
defender	333
union	332
vaccine	332
infect	331
always	331
milan	328
mirror	326
interview	326
sun	325
pull	324
mark	324
doctor	324
moment	323
nothing	322
friday	322
short	321
scare	320
explain	320
clear	319
exercise	318
create	317
monday	316
piece	316
job	316
lufc	316
entire	315
woman	315
fit	315
refuse	314
rise	314
calendar	314
prime	314
listen	314
focus	313
he's	312
attend	312
wife	312
david	311
fall	311
once	311
nfl	310
grind	310
loss	309
cycle	308
liga	308
food	307
protect	306
paul	305
able	303
aid	303
guy	302
young	302
difficult	302
tokyo2020	301
wolf	299
tomorrow	298
culture	298
conor	298
understand	296
wwe	296
express	295
sport's	295
joe	295
kid	294
uncertainty	294
pass	294
pfa	294
john	293
suffer	292
mcgregor	291
bid	290
striker	290
board	290
organisation	289
extra	289
war	288
receive	287
name	287
hero	287
football's	286
handshake	286
wednesday	286
zealand	286
different	285
answer	285
eligibility	285
sheffield	284
derby	284
almost	284
hudson-odoi	284
rooney	284
belarus	284
ceo	283
icymi	283
wayne	283
sense	280
pro	280
august	280
finally	280
suggest	279
wake	279
there’s	279
grant	279
spectator	278
crowd	278
wonder	278
today's	278
senior	278
sector	278
djokovic	276
chinese	275
guardiola	275
esports	275
boris	275
kill	275
indian	274
bahrain	273
others	273
novak	273
press	272
director	271
england's	271
potential	271
gathering	271
that's	271
enough	271
reality	271
premierleague	270
boxer	270
little	269
deferral	269
camp	268
ongoing	267
sorry	267
strong	267
whole	266
tip	266
nufc	266
avoid	265
treat	265
gaa	265
tom	265
messi	265
currently	263
midfielder	263
charge	262
act	260
problem	259
serious	258
track	257
athletics	257
dana	257
effort	256
gesture	256
precaution	255
africa	255
villa	255
safety	254
leicester	254
spfl	254
small	254
cope	254
fitness	254
dcfc	254
german	253
chris	253
september	253
spend	252
mlb	252
learn	252
johnson	252
brazil	252
announcement	251
pause	251
beat	251
federation	250
recovery	250
uae	249
independent	249
market	249
supporter	249
increase	248
jurgen	248
kick	247
yes	247
threaten	246
fine	246
pledge	246
atletico	246
conference	244
ball	244
american	244
blog	244
reason	243
domestic	243
negative	243
tonight	243
cash	243
maybe	242
comment	242
deliver	242
scrap	241
below	241
opportunity	241
aston	241
mother	241
view	240
child	240
tough	240
college	240
callum	240
epl	238
sports	238
buy	237
control	236
safc	236
cover	236
249	236
someone	235
trip	235
front	235
less	235
king	235
ham	235
women’s	235
master	235
sunday	234
class	234
isolate	234
hockey	233
combat	233
party	233
self-isolating	233
vulnerable	233
apos	233
reportedly	232
japan's	232
india	231
aim	231
blow	231
northern	230
coronavi	229
brighton	229
company	228
joshua	228
nigeria	227
word	227
limit	226
usa	226
gym	226
prem	225
normal	225
thursday	225
brilliant	224
probably	224
govern	223
disease	223
thought	223
leader	222
facility	222
program	222
reschedule	221
worth	221
eddie	221
dybala	221
base	220
son	220
anything	219
officially	219
guideline	219
wear	219
lift	219
essential	219
pub	219
customer	219
ecb	219
100	218
fury	218
epidemic	217
solution	217
boost	217
unprecedented	217
non-playing	217
breaking	216
youth	216
tie	216
refund	216
bill	216
large	215
stoke	215
ace	215
walk	215
mike	214
prevent	214
respond	214
self	214
friend	214
pressure	213
react	213
ago	213
steve	213
happy	212
shop	212
legal	212
lack	211
shock	211
stick	211
thousand	211
jack	211
portsmouth	210
venue	209
reach	209
yesterday	209
pompey	209
actually	208
throw	208
shake	207
shit	207
accept	207
abe	207
imagine	206
black	206
mass	205
hundred	205
touch	205
seek	205
low	205
tyson	205
development	204
victim	203
total	203
division	203
minute	202
coro	202
deny	202
council	202
though	202
half	202
coronaviru	202
approach	201
surprise	201
elite	201
opinion	201
god	201
that’s	200
true	200
amaze	200
healthy	200
qualifier	198
enjoy	198
afc	198
project	198
cricketer	197
vote	197
field	197
record	197
visit	197
lock	197
he’s	197
house	197
october	197
road	197
subscription	197
melbourne	196
several	196
remember	196
wish	195
headline	194
form	194
commit	193
experience	193
window	193
fee	193
dutch	193
ventilator	193
toll	192
coronav	192
period	192
emerge	192
footy	192
example	191
tuesday	191
frontline	191
eye	190
student	190
flight	190
seriously	190
canada	190
patient	189
germany	188
involve	188
coronavir	188
usual	188
cor	188
sri	187
absolutely	187
michael	186
avfc	186
wild	185
scott	185
breathe	185
khabib	185
brady	185
mourinho	184
andy	184
chat	184
role	184
dcfcfans	184
ease	184
🗣️	183
fair	183
wrestlemania	183
volunteer	183
googlealerts	182
joke	182
nice	182
stance	182
perfect	182
proud	182
spur	181
mind	181
britain	181
boy	181
figure	181
lanka	180
rival	180
column	180
air	180
echo	180
pga	179
ignore	179
drive	179
pogba	179
rather	178
bayern	178
pitch	178
welcome	177
cnn	177
entertainment	177
outside	177
table	177
workout	177
gareth	177
japanese	176
relate	176

## Sheet: bi-gram
Ngram_1	Ngram_2	Count	NgramLength
premier	league	5573	2
due	coronavirus	4428	2
coronavirus	pandemic	3598	2
amid	coronavirus	3079	2
coronavirus	crisis	2833	2
test	positive	2786	2
bbc	sport	2692	2
coronavirus	outbreak	2581	2
sport	coronavirus	2074	2
positive	coronavirus	1878	2
close	door	1714	2
coronavirus	sport	1711	2
behind	close	1695	2
sport	event	1513	2
coronavirus	lockdown	1306	2
coronavirus	fear	1301	2
grand	prix	1238	2
pay	cut	1139	2
league	club	929	2
tokyo	olympic	919	2
six	nation	883	2
champion	league	845	2
tokyo	2020	845	2
cancel	due	764	2
call	off	738	2
postpone	due	729	2
coronavirus	covid19	708	2
despite	coronavirus	687	2
euro	2020	668	2
bbc	news	666	2
covid-19	pandemic	666	2
due	covid-19	660	2
play	behind	658	2
shut	down	639	2
news	coronavirus	633	2
player	test	623	2
contract	coronavirus	599	2
news	noticias	598	2
coronavirus	test	590	2
mikel	arteta	584	2
fight	coronavirus	573	2
man	utd	566	2
take	pay	549	2
coronavirus	premier	548	2
postpone	coronavirus	543	2
sport	news	543	2
australian	grand	542	2
coronavirus	shutdown	536	2
fight	against	516	2
manchester	unite	510	2
coronavirus	news	507	2
take	place	494	2
2020	olympic	484	2
leeds	unite	482	2
world	cup	481	2
noticias	bitcoi	481	2
impact	coronavirus	478	2
live	sport	471	2
man	city	463	2
real	madrid	462	2
die	coronavirus	458	2
europa	league	449	2
against	coronavirus	447	2
league	season	429	2
cancel	coronavirus	427	2
contact	sport	426	2
mailonline	coronavirus	419	2
coronavirus	impact	400	2
covid-19	crisis	393	2
nottingham	forest	392	2
spring	sport	390	2
coronavirus	concern	389	2
national	league	384	2
coronavirus	update	383	2
world	sport	380	2
spread	coronavirus	375	2
rugby	league	375	2
wage	cut	375	2
coronavirus	late	374	2
game	postpone	372	2
positive	covid-19	370	2
manchester	city	369	2
around	world	363	2
gary	neville	363	2
every	sport	362	2
stay	home	362	2
league	player	359	2
social	distance	358	2
norman	hunter	349	2
olympic	game	347	2
event	cancel	345	2
coronavirus	football	344	2
kenny	dalglish	344	2
daily	mail	343	2
league	suspend	333	2
sport	live	332	2
sport	cancel	328	2
per	cent	321	2
football	league	319	2
football	coronavirus	319	2
lewis	hamilton	315	2
cristiano	ronaldo	314	2
amid	covid-19	313	2
sky	sport	311	2
coronavirus	hit	309	2
test	coronavirus	307	2
die	contract	303	2
player	staff	302	2
covid-19	sport	298	2
major	sport	294	2
league	efl	291	2
horse	race	290	2
late	update	287	2
help	fight	287	2
hit	coronavirus	286	2
first	time	286	2
football	season	284	2
impact	covid-19	284	2
live	update	282	2
affect	coronavirus	281	2
full	story	280	2
sport	amp	280	2
new	zealand	280	2
impact	sport	279	2
olympic	postpone	279	2
sport	england	278	2
coronavirus	tokyo	276	2
league	game	275	2
football	club	274	2
sport	world	274	2
news	live	273	2
season	suspend	271	2
suspend	season	269	2
coronavirus	affect	267	2
scottish	football	265	2
cancel	sport	265	2
super	league	265	2
arsenal	manager	265	2
player	take	265	2
english	football	261	2
response	coronavirus	261	2
finish	season	260	2
prime	minister	259	2
sport	athlete	259	2
coronavirus	spread	252	2
coronavirus	live	252	2
sport	club	250	2
covid19	coronavirus	249	2
cheltenham	festival	248	2
chief	executive	248	2
sport	late	248	2
look	like	246	2
conor	mcgregor	246	2
physical	activity	246	2
coronavirus	symptom	245	2
league	star	245	2
global	sport	242	2
next	week	238	2
coronavirus	threat	237	2
league	match	237	2
become	first	236	2
postpone	2021	236	2
west	ham	235	2
amp	apos	233	2
coronavirus	force	232	2
ufc	249	227	2
professional	sport	226	2
dana	white	226	2
mental	health	224	2
good	news	223	2
late	information	223	2
sir	kenny	222	2
league	title	221	2
coronavirus	case	221	2
sport	covid-19	221	2
coronavirus	suspension	221	2
jurgen	klopp	220	2
2020	season	219	2
covid-19	outbreak	219	2
team	member	218	2
grand	national	217	2
pep	guardiola	216	2
sport	italy	216	2
league	europa	216	2
2020	postpone	215	2
arteta	test	215	2
callum	hudson-odoi	215	2
tour	france	214	2
community	sport	214	2
wage	deferral	214	2
sport	fan	211	2
break	news	208	2
aston	villa	208	2
unite	legend	208	2
football	sport	207	2
wayne	rooney	207	2
season	cancel	206	2
suspend	due	205	2
wimbledon	cancel	205	2
off	coronavirus	204	2
non-playing	staff	204	2
return	train	203	2
thank	contact	203	2
sport	star	201	2
covid-19	lockdown	201	2
information	please	200	2
far	notice	195	2
govern	body	194	2
get	coronavirus	193	2
season	due	192	2
end	season	192	2
suspend	april	192	2
coronavirus	fight	191	2
inter	milan	190	2
two	week	188	2
help	coronavirus	188	2
nation	game	187	2
mirror	online	187	2
league	coronavirus	187	2
off	due	185	2
coronavirus	chaos	184	2
italy	suspend	181	2
coronavirus	scare	180	2
time	coronavirus	180	2
game	play	180	2
come	back	180	2
2021	due	180	2
dcfc	dcfcfans	179	2
sri	lanka	178	2
match	postpone	177	2
city	arsenal	177	2
coronavirus	formula	176	2
covid-19	test	176	2
boris	johnson	173	2
ahead	plan	172	2
social	medium	172	2
coronavirus	cancel	172	2
match	play	172	2
sport	league	171	2
season	coronavirus	171	2
anthony	joshua	171	2
ahead	despite	170	2
player	coronavirus	170	2
show	symptom	169	2
hospital	coronavirus	168	2
follow	coronavirus	167	2
novak	djokovic	167	2
efl	suspend	167	2
news	sport	166	2
empty	stadium	166	2
football	match	165	2
atletico	madrid	165	2
next	year	165	2
hunter	leeds	165	2
break	coronavirus	164	2
recover	coronavirus	163	2
door	due	162	2
cancel	postpone	162	2
least	april	162	2
sport	sport	161	2
year	eligibility	161	2
coronavirus	quarantine	160	2
coronavirus	epidemic	159	2
arsenal	player	159	2
season	end	159	2
play	sport	159	2
sport	physical	159	2
result	coronavirus	157	2
sport	return	157	2
shake	hand	155	2
travel	ban	155	2
late	coronavirus	155	2
player	contract	155	2
game	behind	154	2
late	sport	154	2
train	grind	154	2
spanish	football	154	2
ireland	italy	153	2
face	mask	153	2
top	story	153	2
corona	virus	153	2
sport	watch	152	2
shinzo	abe	152	2
lionel	messi	152	2
paulo	dybala	152	2
help	club	152	2
coronavirus	australian	151	2
nffc	forest	151	2
player	coach	151	2
olympic	committee	150	2
rugby	union	150	2
coronavirus	leave	150	2
fan	coronavirus	149	2
leicester	city	149	2
suspend	indefinitely	148	2
furlough	staff	148	2
amp	sport	147	2
title	coronavirus	146	2
fear	coronavirus	146	2
season	finish	146	2
liverpool	echo	146	2
financial	impact	146	2
case	coronavirus	145	2
tokyo	game	145	2
sport	play	145	2
emergency	fund	145	2
dalglish	test	145	2
suspend	coronavirus	144	2
new	coronavirus	144	2
against	covid-19	144	2
play	game	142	2
london	marathon	142	2
coronavirus	bbc	142	2
next	month	142	2
relief	fund	142	2
get	back	141	2
day	sport	141	2
tyson	fury	141	2
game	against	140	2
olympic	ahead	139	2
2020	cancel	139	2
set	postpone	138	2
rugby	player	138	2
complete	season	138	2
coronavirus	take	137	2
live	news	137	2
super	rugby	137	2
coronavirus	battle	137	2
stokecity	scfc	137	2
test	negative	136	2
sport	activity	136	2
battle	coronavirus	136	2
league	return	136	2
cut	amid	136	2
new	york	135	2
manager	mikel	135	2
public	health	135	2
member	test	135	2
nation	match	134	2
hong	kong	134	2
football	return	134	2
football	coach	134	2
football	suspend	133	2
notice	nigeria	133	2
nigeria	naija	133	2
naija	sport	133	2
sport	bbnaija	133	2
coronavirus	continue	132	2
catch	coronavirus	132	2
football	fan	132	2
door	coronavirus	132	2
efl	club	132	2
cut	coronavirus	132	2
help	sport	132	2
south	africa	131	2
suspend	least	131	2
helmut	marko	131	2
sport	guardian	130	2
null	void	130	2
marathon	postpone	130	2
french	open	130	2
world	war	129	2
transfer	window	129	2
extra	year	129	2
head	coach	128	2
stoke	city	128	2
season	complete	128	2
next	season	128	2
new	sport	127	2
coronavirus	shut	127	2
jack	grealish	127	2
club	coronavirus	126	2
tennis	player	126	2
evangelos	marinakis	126	2
covid19	covidー19	126	2
legend	die	126	2
sheffield	unite	125	2
good	sport	125	2
post	coronavirus	125	2
team	sport	125	2
liverpool	legend	125	2
miss	sport	125	2
uae	tour	124	2
become	late	124	2
jose	mourinho	124	2
coronavirus	cause	124	2
event	around	123	2
bayern	munich	123	2
sport	back	123	2
rudy	gobert	123	2
nba	suspend	123	2
affect	sport	122	2
bahrain	grand	122	2
sport	take	121	2
coronavirus	situation	121	2
sport	covid19	121	2
coronavirus	restriction	121	2
minister	sport	121	2
make	decision	121	2
april	due	121	2
survive	coronavirus	121	2
live	premier	121	2
coronavirus	age	121	2
nba	star	121	2
gary	lineker	121	2
guinea	pig	121	2
coronavirus	covid-19	120	2
death	toll	120	2
golf	club	120	2
stay	safe	120	2
coronavirus	meet	120	2
coronavirus	delay	120	2
wale	scotland	119	2
release	statement	119	2
australian	sport	119	2
sport	get	118	2
coronavirus	arsenal	118	2
red	bull	117	2
match	against	117	2
matt	hancock	117	2
deal	coronavirus	117	2
raise	money	117	2
return	coronavirus	117	2
mailonline	coronavírus	117	2
coronavírus	news	117	2
covidー19	モンストフェアリーテイル	117	2
coronavirus	mean	116	2
send	message	116	2
coronavirus	diagnosis	116	2
watch	sport	116	2
liverpool	fan	115	2
decision	make	115	2
sport	season	115	2
club	face	115	2
arsenal	boss	115	2
postpone	amid	114	2
look	forward	114	2
cup	final	114	2
coronavirus	gary	114	2
madrid	president	114	2
mother	die	114	2
new	date	113	2
sport	team	113	2
take	wage	113	2
cancel	season	112	2
sport	time	112	2
emergency	meet	112	2
cent	pay	112	2
player	wage	112	2
serie	match	111	2
coronavirus	amp	111	2
issue	coronavirus	111	2
love	sport	111	2
covid-19	update	111	2
red	bull's	111	2
olympic	cancel	110	2
hit	sport	110	2
covid-19	coronavirus	110	2
coronavirus	italy	110	2
last	week	110	2
formula	team	110	2
olympic	sport	110	2
city	manager	110	2
prix	cancel	110	2
fight	covid-19	110	2
effect	coronavirus	109	2
indian	well	109	2
donate	million	109	2
league	postpone	108	2
take	coronavirus	108	2
sport	suspend	108	2
extreme	sport	107	2
league	cancel	107	2
league	set	107	2
daniele	rugani	107	2
paul	pogba	107	2
coronavirus	liverpool	106	2
push	back	106	2
spread	covid-19	106	2
school	sport	106	2
wake	coronavirus	106	2
staff	furlough	106	2
roger	federer	105	2
show	coronavirus	105	2
lorenzo	sanz	105	2
european	football	104	2
event	postpone	104	2
mufc	manutd	104	2
coronavirus	decision	104	2
youth	sport	104	2
sport	organization	104	2
2020	coronavirus	103	2
coronavirus	read	103	2
italian	football	103	2
man	unite	103	2
sport	minister	103	2
hit	hard	103	2
april	early	103	2
come	together	103	2
arteta	arsenal	103	2
francisco	garcia	103	2
game	ahead	102	2
concern	coronavirus	102	2
put	hold	102	2
serie	season	102	2
tour	cancel	102	2
2020	tokyo	102	2
golf	course	102	2
forest	owner	102	2
former	real	102	2
game	coronavirus	101	2
nation	clash	101	2
feel	like	101	2
reveal	coronavirus	101	2
staff	test	101	2
time	sport	101	2
women's	sport	101	2
city	player	101	2
community	emergency	101	2
update	coronavirus	100	2
coronavirus	ireland	100	2
sport	calendar	100	2
coronavirus	stop	100	2
newcastle	unite	100	2
crystal	palace	100	2
northern	ireland	100	2
business	usual	100	2
local	sport	100	2
football	federation	100	2
coronavirus	precaution	99	2
national	sport	99	2
coronavirus	put	99	2
mako	vunipola	99	2
premier	league's	99	2
lockdown	rule	99	2
liverpool	miss	98	2
prix	postpone	98	2
italy	six	98	2
coronavirus	response	98	2
favorite	sport	98	2
big	sport	98	2
work	home	98	2
sport	matter	98	2
stay	active	98	2
postpone	year	98	2
nba	player	98	2
owner	evangelos	98	2
prix	call	98	2
liverpool	win	97	2
press	conference	97	2
league	football	97	2
via	bbc	97	2
season	amid	97	2
coronavirus	statement	97	2
euro	fight	97	2
staff	coronavirus	97	2
season	ticket	97	2
people	die	96	2
coronavirus	plan	96	2
combat	coronavirus	96	2
crisis	talk	96	2
sport	come	96	2
first	premier	96	2
coronavirus	notice	96	2
nottinghamshire	live	96	2
season	resume	96	2
open	hotel	96	2
anthony	yarde	96	2
threat	coronavirus	95	2
coronavirus	threaten	95	2
coronavirus	make	95	2
sport	relief	95	2
down	coronavirus	95	2
cancel	first	95	2
pep	guardiola's	95	2
get	well	95	2
restart	season	95	2
hotel	staff	95	2
195	million	95	2
sport	face	94	2
home	coronavirus	94	2
medium	liverpool	94	2
league	fixture	94	2
juventus	star	94	2
test	kit	94	2
return	sport	94	2
sport	football	93	2
italian	sport	93	2
game	cancel	93	2
dele	alli	93	2
postpone	game	93	2
feel	good	93	2
ask	player	93	2
guardiola's	mother	93	2
ioc	member	92	2
talk	coronavirus	92	2
ban	sport	92	2
covid-19	impact	92	2
positive	test	92	2
make	sure	92	2
sport	body	92	2
arsenal	postpone	92	2
stand	down	92	2
six	week	92	2
player	show	92	2
mike	ashley	92	2
pga	tour	91	2
hold	emergency	91	2
suspend	sport	91	2
week	coronavirus	91	2
major	league	91	2
first	major	91	2
world	champion	91	2
kick	off	91	2
liverpool	atletico	91	2
coronavirus	message	91	2
football	authority	90	2
sport	still	90	2
season	start	90	2
return	home	90	2
new	post	90	2
live	blog	90	2
first	team	90	2
high	school	90	2
keep	fit	90	2
staff	take	90	2
coronavirus	advice	89	2
get	cancel	89	2
sport	due	89	2
mass	gathering	89	2
liverpool	title	89	2
coronavirus	red	89	2
football	association	89	2
2019/20	season	89	2
rugani	test	89	2
return	action	89	2
hudson-odoi	test	89	2
neville	open	89	2
sport	affect	88	2
ongoing	coronavirus	88	2
juventus	player	88	2
negative	coronavirus	88	2
news	transfer	88	2
pandemic	sport	88	2
covid-19	case	88	2
game	amid	88	2
happen	next	88	2
player	agree	88	2
train	session	87	2
due	take	87	2
football	player	87	2
league	clash	87	2
due	covid19	87	2
few	week	87	2
football	team	87	2
kubrat	pulev	87	2
event	affect	86	2
take	part	86	2
olympic	coronavirus	86	2
coronavirus	uncertainty	86	2
sport	bet	86	2
cancel	amid	86	2
covid19	sport	86	2
coronavirus	nba	86	2
sport	art	86	2
spring-sport	athlete	86	2
amir	khan	86	2
south	korea	85	2
play	football	85	2
make	sense	85	2
talk	sport	85	2
cut	short	85	2
lebron	jam	85	2
battle	against	85	2
manager	test	85	2
chelsea	star	85	2
help	community	85	2
roman	abramovich	85	2
game	due	84	2
event	due	84	2
coronavirus	manchester	84	2
right	thing	84	2
ole	gunnar	84	2
year	due	84	2
unite	state	84	2
borussia	dortmund	84	2
coronavirus	government	84	2
eddie	hearn	84	2
staff	help	84	2
cut	player	84	2
postpone	cancel	83	2
derby	county	83	2
coronavirus	vaccine	83	2
symptom	coronavirus	83	2
sport	resume	83	2
national	cancel	83	2
liverpool	sir	83	2
hunter	die	83	2
confirm	case	82	2
read	full	82	2
international	sport	82	2
sport	like	82	2
new	case	82	2
transfer	live	82	2
like	sport	82	2
rafael	nadal	82	2
late	news	82	2
unite	star	82	2
donald	trump	82	2
utd	star	82	2
release	hospital	82	2
bbc	football	82	2
bull's	helmut	82	2
world	rugby	81	2
race	postpone	81	2
serie	game	81	2
four	month	81	2
olympic	organiser	81	2
sport	business	81	2
coronavirus	england	81	2
unite	player	81	2
nba	season	81	2
billy	joe	81	2
ahead	japan's	81	2
sadio	mane	81	2
financial	support	81	2
marouane	fellaini	81	2
breathe	aid	81	2
covid-19	virus	80	2
south	african	80	2
sport	fixture	80	2
sport	shut	80	2
postpone	tokyo	80	2
welsh	rugby	80	2
last	night	80	2
star	take	80	2
coronavirus	measure	80	2
family	member	80	2
postpone	euro	80	2
brazil	president	80	2
eligibility	spring	80	2
coronavirus	relief	80	2
march	2020	79	2
outbreak	coronavirus	79	2
coronavirus	isolation	79	2
contingency	plan	79	2
sport	look	79	2
suspend	football	79	2
live	coronavirus	79	2
well	soon	79	2
covid19	pandemic	79	2
karren	brady	79	2
fan	amid	78	2
against	italy	78	2
event	coronavirus	78	2
two	month	78	2
english	premier	78	2
diagnose	coronavirus	78	2
coronavirus	olympic	78	2
beat	coronavirus	78	2
people	stay	78	2
lock	down	78	2
nrl	player	78	2
sport	industry	78	2
sport	direct	78	2
good	thing	78	2
uefa	postpone	78	2
noticias	bitcoin	78	2
japan's	shinzo	78	2
plan	despite	77	2
make	coronavirus	77	2
championship	cancel	77	2
void	season	77	2
coronavirus	uefa	77	2
sport	make	77	2
many	people	77	2
next	few	77	2
key	question	77	2
league	final	77	2
response	covid-19	77	2
start	again	77	2
become	infect	77	2
agree	wage	77	2
marko	tell	77	2
project	restart	77	2
event	hit	76	2
green	light	76	2
coronavirus	cut	76	2
tournament	cancel	76	2
race	cancel	76	2
international	olympic	76	2
sport	hit	76	2
league	hold	76	2
every	day	76	2
player	get	76	2
despite	covid-19	76	2
coronavirus	postponement	76	2
coronavirus	english	76	2
get	sport	76	2
coach	staff	76	2
pusb	skyblues	76	2
culture	medium	76	2
covid	coronavirus	76	2
still	play	76	2
sport	start	76	2
rugby	season	76	2
max	verstappen	76	2
coronavirus	wayne	76	2
sport	competition	75	2
explain	why	75	2
postpone	october	75	2
cardiff	city	75	2
joe	saunders	75	2
die	age	75	2
take	per	75	2
kyle	walker	75	2
olympic	paralympic	74	2
women's	six	74	2
play	coronavirus	74	2
tennis	tournament	74	2
west	brom	74	2
coronavirus	rugby	74	2
postpone	olympic	74	2
swansea	city	74	2
gareth	southgate	74	2
sad	news	74	2
player	self-isolation	74	2
marcus	rashford	74	2
three	leicester	74	2
coronavirus	self-isolation	74	2
coach	die	74	2
tell	team's	74	2
discuss	coronavirus	73	2
coronavirus	get	73	2
world	championship	73	2
wreak	havoc	73	2
coronavirus	full	73	2
year	coronavirus	73	2
gunnar	solskjaer	73	2
tokyo2020	olympic	73	2
sport	australia	73	2
business	sport	73	2
league	plan	73	2
time	world	73	2
football	england	73	2
pay	tribute	73	2
coronavirus	just	72	2
risk	coronavirus	72	2
amid	fear	72	2
liverpool	news	72	2
first	sport	72	2
league	meet	72	2
andy	murray	72	2
end	year	72	2
coronavirus	london	72	2
contract	covid-19	72	2
utah	jazz	72	2
dybala	test	72	2
reality	sport	72	2
pay	staff	72	2
fund	help	72	2
art	culture	72	2
play	part	72	2
novak	djokovic's	72	2
just	get	71	2
foreseeable	future	71	2
juventus	inter	71	2
victim	coronavirus	71	2
abc	news	71	2
take	away	71	2
coronavirus	end	71	2
confirm	coronavirus	71	2
face	coronavirus	71	2
next	two	71	2
sport	update	71	2
great	sport	71	2
end	april	71	2
keep	sport	71	2
fan	stay	71	2
sport	love	71	2
question	answer	71	2
message	fan	71	2
tom	brady	71	2
cut	wage	71	2
post	covid-19	71	2
team's	driver	71	2
regard	coronavirus	70	2
play	empty	70	2
article	title	70	2
hold	behind	70	2
hold	coronavirus	70	2
three	week	70	2
championship	postpone	70	2
coronavirus	club	70	2
tony	ferguson	70	2
boss	mikel	70	2
chelsea	winger	70	2
player	face	70	2
covid-19	relief	70	2
footballer	treat	70	2
key	worker	70	2
decision	postpone	69	2
new	theage	69	2
theage	article	69	2
cause	coronavirus	69	2
coronavirus	player	69	2
bahrain	vietnam	69	2
suspend	game	69	2
door	amid	69	2
difficult	time	69	2
plan	play	69	2
bayer	leverkusen	69	2
month	due	69	2
afl	season	69	2
frank	lampard	69	2
update	live	69	2
league	two	69	2
sport	subscription	69	2
coronavirus	belarus	69	2
driver	become	69	2
great	news	68	2
sport	tokyo	68	2
many	sport	68	2
rugby	australia	68	2
staff	member	68	2
year	old	68	2
down	sport	68	2
olympic	minister	68	2
ice	hockey	68	2
test	centre	68	2
nrl	season	68	2
covid-19	symptom	68	2
season	void	68	2
coronavirus	current	68	2
essential	service	68	2
miss	title	67	2
join	force	67	2
chief	warn	67	2
coronavirus	man	67	2
test	covid-19	67	2
league	end	67	2
need	know	67	2
football	star	67	2
news	soccer	67	2
leeds	rhino	67	2
japan's	olympic	67	2
championship	club	67	2
club	need	67	2
coronavirus	recovery	67	2
available	help	67	2
current	dark	67	2
cut	due	67	2
issue	statement	66	2
government	advice	66	2
football	game	66	2
three	player	66	2
take	sport	66	2
star	coronavirus	66	2
coronavirus	australia	66	2
right	decision	66	2
few	day	66	2
sport	entertainment	66	2
liverpool	star	66	2
warn	club	66	2
agree	pay	66	2
season	restart	66	2
belarus	premier	66	2
italy	postpone	65	2
cancel	olympic	65	2
coronavirus	may	65	2
neutral	venue	65	2
last	year	65	2
sport	just	65	2
coronavirus	italian	65	2
self	isolate	65	2
coronavirus	cancellation	65	2
sport	around	65	2
conspiracy	theory	65	2
women’s	sport	65	2
2021	coronavirus	65	2
important	thing	65	2
call	premier	65	2
cent	wage	65	2
sport	continue	64	2
coronavirus	bring	64	2
quarantine	coronavirus	64	2
mail	online	64	2
postpone	sport	64	2
coronavirus	death	64	2
coronavirus	new	64	2
cancel	event	64	2
urge	fan	64	2
global	pandemic	64	2
week	ago	64	2
postpone	next	64	2
coronavirus	three	64	2
hold	due	64	2
medium	sport	64	2
winter	sport	64	2
support	sport	64	2

## Sheet: tri-gram
Ngram_1	Ngram_2	Ngram_3	Count	NgramLength
test	positive	coronavirus	1675	3
behind	close	door	1637	3
bbc	sport	coronavirus	1185	3
premier	league	club	744	3
amid	coronavirus	crisis	695	3
play	behind	close	635	3
amid	coronavirus	pandemic	633	3
due	coronavirus	pandemic	578	3
cancel	due	coronavirus	548	3
coronavirus	premier	league	542	3
take	pay	cut	536	3
australian	grand	prix	528	3
due	coronavirus	outbreak	524	3
postpone	due	coronavirus	522	3
amid	coronavirus	outbreak	499	3
news	noticias	bitcoi	481	3
player	test	positive	480	3
mailonline	coronavirus	news	419	3
coronavirus	news	noticias	419	3
test	positive	covid-19	333	3
tokyo	2020	olympic	320	3
fight	against	coronavirus	297	3
bbc	news	coronavirus	294	3
premier	league	player	290	3
premier	league	season	289	3
amid	coronavirus	fear	288	3
coronavirus	sport	live	288	3
premier	league	efl	287	3
die	contract	coronavirus	264	3
premier	league	star	232	3
champion	league	europa	212	3
sir	kenny	dalglish	209	3
league	europa	league	206	3
arteta	test	positive	203	3
thank	contact	sport	202	3
spring	sport	athlete	200	3
late	information	please	199	3
contact	sport	late	196	3
sport	late	information	195	3
sport	event	cancel	191	3
leeds	unite	legend	191	3
due	coronavirus	crisis	190	3
premier	league	title	188	3
six	nation	game	186	3
mikel	arteta	test	171	3
due	coronavirus	fear	169	3
suspend	due	coronavirus	166	3
help	fight	coronavirus	162	3
norman	hunter	leeds	162	3
close	door	due	161	3
positive	coronavirus	test	161	3
coronavirus	tokyo	olympic	160	3
tokyo	olympic	postpone	157	3
2021	due	coronavirus	151	3
game	behind	close	150	3
hunter	leeds	unite	144	3
player	take	pay	143	3
dalglish	test	positive	143	3
off	due	coronavirus	141	3
premier	league	coronavirus	141	3
coronavirus	sport	news	139	3
premier	league	suspend	139	3
sport	physical	activity	139	3
call	off	due	138	3
kenny	dalglish	test	134	3
six	nation	match	133	3
door	due	coronavirus	133	3
notice	nigeria	naija	133	3
nigeria	naija	sport	133	3
naija	sport	bbnaija	133	3
manager	mikel	arteta	131	3
close	door	coronavirus	131	3
sport	italy	suspend	127	3
postpone	2021	due	124	3
premier	league	game	122	3
coronavirus	covid19	covidー19	122	3
bahrain	grand	prix	121	3
arsenal	manager	mikel	121	3
live	premier	league	120	3
mailonline	coronavírus	news	117	3
coronavírus	news	noticias	117	3
covid19	covidー19	モンストフェアリーテイル	117	3
season	due	coronavirus	115	3
sport	live	update	115	3
euro	2020	postpone	115	3
league	efl	suspend	115	3
coronavirus	late	update	114	3
premier	league	return	114	3
cut	amid	coronavirus	114	3
sport	event	around	113	3
due	covid-19	pandemic	113	3
ahead	despite	coronavirus	112	3
event	around	world	111	3
per	cent	pay	111	3
grand	prix	cancel	110	3
extra	year	eligibility	110	3
sport	news	live	109	3
spanish	football	coach	109	3
match	play	behind	108	3
tokyo	olympic	ahead	108	3
unite	legend	die	108	3
coronavirus	live	update	107	3
coronavirus	australian	grand	107	3
premier	league	match	105	3
olympic	postpone	2021	105	3
die	coronavirus	age	104	3
coronavirus	gary	neville	104	3
coronavirus	shut	down	103	3
cent	pay	cut	103	3
mikel	arteta	arsenal	102	3
six	nation	clash	101	3
coronavirus	impact	sport	101	3
coronavirus	bbc	sport	101	3
former	real	madrid	101	3
despite	coronavirus	outbreak	100	3
member	test	positive	100	3
grand	prix	postpone	98	3
grand	prix	call	98	3
community	emergency	fund	98	3
italy	six	nation	97	3
amid	coronavirus	lockdown	97	3
real	madrid	president	97	3
legend	die	contract	97	3
tokyo	olympic	game	96	3
wimbledon	cancel	due	96	3
despite	coronavirus	fear	95	3
call	off	coronavirus	95	3
major	sport	event	95	3
man	city	arsenal	95	3
arteta	arsenal	manager	95	3
postpone	coronavirus	fear	94	3
medium	liverpool	echo	94	3
coronavirus	tokyo	2020	94	3
suspend	least	april	94	3
sport	coronavirus	premier	94	3
prix	call	off	94	3
2020	olympic	game	93	3
nottingham	forest	owner	92	3
pay	cut	coronavirus	92	3
game	play	behind	90	3
first	premier	league	89	3
owner	evangelos	marinakis	89	3
gary	neville	open	89	3
ireland	italy	six	88	3
london	marathon	postpone	88	3
sport	coronavirus	sport	87	3
fight	against	covid-19	87	3
neville	open	hotel	87	3
cancel	sport	event	86	3
rugani	test	positive	86	3
fight	coronavirus	pandemic	86	3
cancel	first	time	86	3
event	cancel	postpone	85	3
april	due	coronavirus	85	3
team	member	test	85	3
nba	suspend	season	85	3
pay	cut	amid	85	3
take	wage	cut	85	3
game	postpone	coronavirus	84	3
postpone	amid	coronavirus	84	3
2020	tokyo	olympic	84	3
amid	covid-19	pandemic	84	3
manager	test	positive	84	3
amid	coronavirus	concern	83	3
hudson-odoi	test	positive	83	3
due	take	place	82	3
manchester	city	manager	82	3
grand	national	cancel	82	3
euro	fight	coronavirus	82	3
red	bull's	helmut	82	3
liverpool	sir	kenny	82	3
pep	guardiola's	mother	80	3
olympic	ahead	japan's	79	3
open	hotel	staff	79	3
test	negative	coronavirus	78	3
hit	coronavirus	pandemic	78	3
news	noticias	bitcoin	78	3
get	well	soon	78	3
japan's	shinzo	abe	78	3
man	utd	star	77	3
bull's	helmut	marko	77	3
english	premier	league	76	3
ahead	japan's	shinzo	76	3
helmut	marko	tell	76	3
coronavirus	red	bull's	76	3
guardiola's	mother	die	76	3
sport	shut	down	75	3
premier	league	set	75	3
manchester	city	arsenal	75	3
billy	joe	saunders	75	3
eligibility	spring	sport	75	3
coronavirus	wayne	rooney	75	3
take	per	cent	75	3
via	bbc	sport	74	3
postpone	euro	2020	74	3
efl	suspend	april	74	3
cancel	due	covid-19	73	3
uae	tour	cancel	73	3
coronavirus	notice	nigeria	73	3
ole	gunnar	solskjaer	72	3
women's	six	nation	72	3
due	coronavirus	concern	72	3
season	amid	coronavirus	71	3
financial	impact	coronavirus	71	3
despite	coronavirus	pandemic	71	3
marko	tell	team's	71	3
dybala	test	positive	70	3
new	theage	article	69	3
theage	article	title	69	3
hold	behind	close	69	3
close	door	amid	69	3
show	coronavirus	symptom	69	3
tell	team's	driver	69	3
amid	coronavirus	chaos	68	3
international	olympic	committee	68	3
news	transfer	live	68	3
suspend	april	early	68	3
sport	live	premier	68	3
arsenal	boss	mikel	68	3
event	cancel	due	67	3
liverpool	atletico	madrid	67	3
arsenal	manager	test	67	3
boss	mikel	arteta	67	3
hotel	staff	help	67	3
fan	amid	coronavirus	66	3
liverpool	miss	title	66	3
sport	event	hit	66	3
sport	news	soccer	66	3
game	amid	coronavirus	66	3
football	coach	die	66	3
sport	event	affect	65	3
help	fight	against	65	3
daniele	rugani	test	65	3
per	cent	wage	65	3
league	player	take	65	3
event	hit	coronavirus	64	3
tokyo	2020	postpone	64	3
coronavirus	live	news	64	3
time	world	war	64	3
coronavirus	current	dark	64	3
belarus	premier	league	64	3
driver	become	infect	64	3
bbc	sport	norman	64	3
coronavirus	hit	sport	63	3
cancel	amid	coronavirus	63	3
call	premier	league	63	3
city	arsenal	postpone	63	3
first	time	world	63	3
wayne	rooney	footballer	63	3
team's	driver	become	63	3
due	coronavirus	sport	62	3
olympic	game	postpone	62	3
callum	hudson-odoi	test	62	3
grand	prix	ahead	61	3
read	full	story	61	3
daily	mail	online	61	3
postpone	due	covid-19	61	3
digital	culture	medium	61	3
coronavirus	update	live	61	3
current	dark	reality	61	3
dark	reality	sport	61	3
staff	help	crisis	61	3
sport	norman	hunter	61	3
norman	hunter	die	61	3
ahead	plan	despite	60	3
event	due	coronavirus	60	3
premier	league	hold	60	3
champion	league	game	60	3
door	amid	coronavirus	60	3
premier	league	meet	60	3
rooney	footballer	treat	60	3
president	lorenzo	sanz	60	3
legend	norman	hunter	60	3
tour	sri	lanka	59	3
sport	coronavirus	tokyo	59	3
shut	down	sport	59	3
marathon	postpone	october	59	3
physical	activity	sector	59	3
monaco	grand	prix	59	3
below	national	league	59	3
player	test	coronavirus	58	3
battle	against	coronavirus	58	3
premier	league	footballer	58	3
response	coronavirus	pandemic	58	3
cancel	coronavirus	pandemic	58	3
sport	art	culture	58	3
madrid	president	lorenzo	58	3
kenny	dalglish	release	58	3
dalglish	release	hospital	58	3
factbox	sport	event	57	3
play	empty	stadium	57	3
football	premier	league	57	3
forest	owner	evangelos	57	3
show	symptom	coronavirus	57	3
take	place	behind	56	3
due	coronavirus	leave	56	3
ask	player	take	56	3
agree	wage	deferral	56	3
game	due	coronavirus	55	3
title	coronavirus	cut	55	3
match	postpone	coronavirus	55	3
premier	league	football	55	3
japan's	olympic	minister	55	3
premier	league	plan	55	3
manchester	unite	star	55	3
hold	emergency	meet	55	3
coach	die	coronavirus	55	3
new	zealand	rugby	55	3
pep	guardiola	manchester	55	3
help	sport	physical	55	3
miss	title	coronavirus	54	3
coronavirus	sport	event	54	3
2020	olympic	postpone	54	3
three	team	member	54	3
three	leicester	city	54	3
amid	coronavirus	shutdown	54	3
paulo	dybala	test	54	3
reality	sport	matter	54	3
guardiola	manchester	city	54	3
hospital	test	positive	54	3
place	behind	close	53	3
olympic	paralympic	game	53	3
culture	medium	sport	53	3
wife	test	positive	53	3
lorenzo	sanz	die	53	3
break	coronavirus	lockdown	53	3
coronavirus	formula	mercedes	53	3
sport	event	postpone	52	3
new	post	coronavirus	52	3
vietnam	grand	prix	52	3
postpone	end	year	52	3
race	call	off	52	3
coronavirus	english	football	52	3
footballer	treat	guinea	52	3
cut	due	coronavirus	52	3
football	below	national	52	3
formula	mercedes	make	52	3
match	call	off	51	3
win	premier	league	51	3
coronavirus	pandemic	sport	51	3
sport	coronavirus	formula	51	3
year	due	coronavirus	51	3
champion	league	match	51	3
bbc	sport	tokyo	51	3
english	football	league	51	3
delay	due	coronavirus	51	3
around	world	hit	51	3
year	eligibility	spring	51	3
former	manchester	unite	51	3
city	manager	donate	51	3
donate	euro	fight	51	3
canadian	grand	prix	51	3
make	breathe	aid	51	3
player	shake	hand	50	3
global	sport	event	50	3
late	sport	event	50	3
prime	minister	shinzo	50	3
minister	shinzo	abe	50	3
2020	cancel	due	50	3
late	premier	league	50	3
dubai	world	cup	50	3
sport	premier	league	50	3
bolsonaro	test	positive	50	3
paralympic	game	postpone	50	3
manager	donate	euro	50	3
mercedes	make	breathe	50	3
pay	cut	matt	50	3
wimbledon	cancel	first	50	3
mother	die	coronavirus	50	3
impact	coronavirus	sport	49	3
event	affect	coronavirus	49	3
fall	victim	coronavirus	49	3
news	coronavirus	sport	49	3
week	due	coronavirus	49	3
world	cup	winner	49	3
leicester	city	player	49	3
reportedly	test	positive	49	3
coronavirus	lockdown	rule	49	3
wimbledon	2020	cancel	49	3
off	amid	coronavirus	48	3
chinese	super	league	48	3
liverpool	news	transfer	48	3
coronavirus	sport	italy	48	3
sport	tokyo	2020	48	3
player	staff	test	48	3
italian	football	federation	48	3
amid	covid-19	crisis	48	3
coach	francisco	garcia	48	3
tour	france	ahead	48	3
national	league	end	48	3
coronavirus	football	below	48	3
cut	matt	hancock	48	3
coronavirus	affect	sport	47	3
sport	hit	coronavirus	47	3
coronavirus	cut	league	47	3
match	behind	close	47	3
player	contract	coronavirus	47	3
europa	league	match	47	3
sky	sport	sport	47	3
help	coronavirus	crisis	47	3
jair	bolsonaro	test	47	3
five	serie	match	46	3
nation	game	postpone	46	3
game	against	italy	46	3
live	wolves	news	46	3
become	first	premier	46	3
feel	good	already	46	3
football	coach	francisco	46	3
francisco	garcia	die	46	3
coronavirus	leave	tennis	46	3
mother	die	contract	46	3
germany's	bundesliga	resume	46	3
coronavirus	germany's	bundesliga	46	3
impact	sport	event	45	3
season	cancel	due	45	3
coronavirus	full	story	45	3
people	stay	home	45	3
impact	covid-19	sport	45	3
pompey	portsmouth	news	45	3
star	test	positive	45	3
grand	prix	set	45	3
agree	pay	cut	45	3
wage	cut	amid	45	3
195	million	package	45	3
bbc	football	coronavirus	45	3
sport	event	coronavirus	44	3
england's	six	nation	44	3
sport	affect	coronavirus	44	3
nation	game	against	44	3
league	match	postpone	44	3
sport	around	world	44	3
premier	league	chief	44	3
sport	cancel	coronavirus	44	3
player	show	symptom	44	3
sport	coronavirus	football	44	3
treat	guinea	pig	44	3
pay	cut	due	44	3
british	grand	prix	44	3
package	help	sport	44	3
leave	tennis	2020	44	3
breathe	aid	freely	44	3
french	grand	prix	44	3
coronavirus	sport	eredivisie	44	3
sport	eredivisie	cancel	44	3
play	game	behind	43	3
postpone	coronavirus	outbreak	43	3
premier	league	cancel	43	3
every	sport	cancel	43	3
covid-19	notice	nigeria	43	3
coronavirus	formula	team	43	3
star	take	pay	43	3
coronavirus	belarus	premier	43	3
furlough	non-playing	staff	43	3
affect	coronavirus	epidemic	42	3
game	postpone	due	42	3
sabc	news	break	42	3
off	coronavirus	fear	42	3
world	cup	qualifier	42	3
coronavirus	outbreak	sport	42	3
coronavirus	ireland	italy	42	3
coronavirus	manchester	unite	42	3
premier	league	champion	42	3
tokyo	2020	ahead	42	3
month	due	coronavirus	42	3
tokyo	2020	ioc	42	3
government	consider	ban	42	3
sport	amid	coronavirus	42	3
league	hold	emergency	42	3
sport	come	back	42	3
president	jair	bolsonaro	42	3
brazil	president	bolsonaro	42	3
bolsonaro	reportedly	test	42	3
father	die	coronavirus	42	3
premier	league	attract	42	3
league	attract	global	42	3
attract	global	attention	42	3
aid	freely	available	42	3
international	day	sport	42	3
liverpool	legend	sir	42	3
legend	sir	kenny	42	3
expert	call	inquiry	42	3
eredivisie	cancel	pandemic	42	3
plan	despite	coronavirus	41	3
news	break	news	41	3
sport	due	coronavirus	41	3
cut	league	short	41	3
declare	null	void	41	3
season	cut	short	41	3
world	cup	final	41	3
fan	stay	home	41	3
indefinitely	due	coronavirus	41	3
exclusive	premier	league	41	3
utah	jazz	player	41	3
news	live	premier	41	3
coach	mikel	arteta	41	3
chelsea	winger	callum	41	3
garcia	die	coronavirus	41	3
stop	return	tennis	41	3
race	behind	close	40	3
amid	covid-19	outbreak	40	3
sport	abc	news	40	3
champion	league	clash	40	3
europa	league	game	40	3
chief	medical	officer	40	3
news	coronavirus	premier	40	3
premier	league	ban	40	3
update	premier	league	40	3
consider	ban	sport	40	3
result	coronavirus	pandemic	40	3
winger	callum	hudson-odoi	40	3
gary	neville	slam	40	3
arteta	feel	good	40	3
global	attention	play	40	3
positive	coronavirus	fourth	40	3
continue	amid	coronavirus	39	3
juventus	inter	milan	39	3
england	six	nation	39	3
premier	league	fixture	39	3
italy	suspend	outbreak	39	3
sport	italy	halt	39	3
break	news	special	39	3
staff	amid	coronavirus	39	3
break	premier	league	39	3
mclaren	team	member	39	3
nba	season	suspend	39	3
test	positive	covid19	39	3
impact	coronavirus	pandemic	39	3
dutch	grand	prix	39	3
wale	scotland	off	39	3
extend	travel	ban	39	3
president	bolsonaro	reportedly	39	3
mailsport	news	noticias	39	3
news	noticias	brasil	39	3
noticias	brasil	brazil	39	3
survive	coronavirus	crisis	39	3
2020	olympic	paralympic	39	3
cheltenham	face	criticism	39	3
legend	hospital	coronavirus	39	3
coronavirus	sport	lma	39	3
sport	coronavirus	outbreak	38	3
schedule	take	place	38	3
amid	coronavirus	uncertainty	38	3
formula	grand	prix	38	3
amid	coronavirus	threat	38	3
first	case	coronavirus	38	3
hit	global	sport	38	3
every	major	sport	38	3
south	china	morning	38	3
league	season	suspend	38	3
season	suspend	due	38	3
late	update	trump	38	3
cut	coronavirus	crisis	38	3
pep	guardiola	donate	38	3
hospital	positive	coronavirus	38	3
chief	warn	club	38	3
unite	legend	hospital	38	3
coronavirus	fourth	time	38	3
sport	lma	chief	38	3
ahead	amid	coronavirus	37	3
chinese	grand	prix	37	3
game	call	off	37	3
become	late	sport	37	3
coronavirus	daily	mail	37	3
europa	league	tie	37	3
set	play	behind	37	3
hold	due	coronavirus	37	3
despite	coronavirus	crisis	37	3
postpone	tokyo	2020	37	3
city	manager	pep	37	3
real	madrid	star	37	3
coronavirus	pandemic	continue	37	3
sport	amp	physical	37	3
world	hit	coronavirus	37	3
death	spanish	football	37	3
national	cancel	coronavirus	37	3
formula	team	help	37	3
cent	wage	cut	37	3
staff	take	pay	37	3
2020	ioc	set	37	3
help	community	sport	37	3
face	criticism	racegoers	37	3
legend	kenny	dalglish	37	3
ahead	end	august	37	3
lma	chief	warn	37	3
prevent	spread	coronavirus	36	3
article	title	coronavirus	36	3
unite	news	live	36	3
2020	postpone	end	36	3
suspend	far	notice	36	3
city	arsenal	premier	36	3
justin	trudeau's	wife	36	3
amp	physical	activity	36	3
coronavirus	horse	race	36	3
welsh	rugby	union	36	3
sport	coronavirus	pandemic	36	3
francisco	garcia	death	36	3
garcia	death	spanish	36	3
information	please	lauras	36	3
commit	complete	season	36	3
resume	behind	close	36	3
fellaini	test	positive	36	3
covid-19	relief	fund	36	3
million	package	help	36	3
criticism	racegoers	suffer	36	3
day	sport	development	36	3
time	six	week	36	3
coronavirus	football	fifa	36	3
fan	due	coronavirus	35	3
liverpool	win	title	35	3
major	league	baseball	35	3
train	amid	coronavirus	35	3
issue	coronavirus	statement	35	3
april	amid	coronavirus	35	3
first	major	sport	35	3
tennis	tournament	cancel	35	3
coronavirus	london	marathon	35	3
news	premier	league	35	3
season	behind	close	35	3
evangelos	marinakis	coronavirus	35	3
anthony	joshua	kubrat	35	3
arsenal	premier	league	35	3
sport	cancel	due	35	3
city	real	madrid	35	3
grand	prix	team	35	3
star	rudy	gobert	35	3
sport	time	coronavirus	35	3
coronavirus	pandemic	bbc	35	3
trudeau's	wife	test	35	3
summer	transfer	window	35	3
national	league	suspend	35	3
league	club	face	35	3
donate	million	euro	35	3
set	deadline	decision	35	3
west	ham	player	35	3
liverpool	legend	kenny	35	3
release	hospital	positive	35	3
back	neutral	venue	35	3
coronavirus	wreak	havoc	34	3
hgv	network	sport	34	3
coronavirus	hit	global	34	3
news	special	report	34	3
see	sun	app	34	3
sun	app	think	34	3
app	think	interest	34	3
event	postpone	due	34	3
joshua	kubrat	pulev	34	3
manager	pep	guardiola	34	3
premier	league	boss	34	3
physical	activity	coronavirus	34	3
league	season	complete	34	3
never	walk	alone	34	3
sport	start	again	34	3
europa	league	final	34	3
champion	league	final	34	3
help	coronavirus	fight	34	3
ioc	set	deadline	34	3
racegoers	suffer	covid-19	34	3
suffer	covid-19	symptom	34	3
league	club	commit	34	3
coronavirus	sport	start	34	3
warn	club	need	34	3
club	need	back	34	3
football	league	suspend	33	3
serie	match	play	33	3
season	declare	null	33	3
game	postpone	health	33	3
six	nation	wale	33	3
postpone	coronavirus	concern	33	3
coronavirus	champion	league	33	3
serie	sport	italy	33	3
halt	due	coronavirus	33	3
italy	suspend	april	33	3
post	coronavirus	sport	33	3
euro	2020	play-off	33	3
china	morning	post	33	3
sport	medicine	advisory	33	3
plan	finish	season	33	3
coronavirus	arsenal	player	33	3
prix	team	member	33	3
coronavirus	real	madrid	33	3
virgil	van	dijk	33	3
coronavirus	test	centre	33	3
player	coach	staff	33	3
mikel	arteta	feel	33	3
athlete	extra	year	33	3
like	guinea	pig	33	3
help	club	coronavirus	33	3
grand	national	2020	33	3
national	2020	cancel	33	3
roman	abramovich	pay	33	3
2020	olympic	organiser	33	3
covid-19	test	kit	33	3
world	snooker	championship	33	3
robert	lewandowski	give	33	3
president	die	contract	33	3
social	distance	rule	33	3
sport	customer	get	33	3
football	fifa	medical	33	3
need	back	neutral	33	3
despite	coronavirus	concern	32	3
grand	prix	coronavirus	32	3
liverpool	echo	liverpool	32	3
liverpool	win	premier	32	3
british	horseracing	authority	32	3
due	covid-19	outbreak	32	3
indian	premier	league	32	3
league	game	postpone	32	3
premier	league	late	32	3
end	year	japan's	32	3
low	league	club	32	3
shut	down	coronavirus	32	3
team	member	place	32	3
premier	league	postpone	32	3
coronavirus	test	kit	32	3
chelsea's	callum	hudson-odoi	32	3
head	coach	mikel	32	3
league	club	meet	32	3
league	suspend	season	32	3
league	suspend	due	32	3
nation	wale	scotland	32	3
scottish	football	suspend	32	3
postpone	coronavirus	pandemic	32	3
manchester	unite	midfielder	32	3
president	dana	white	32	3
return	amid	coronavirus	32	3
join	fight	against	32	3
team	help	supply	32	3
pause	sky	sport	32	3
urge	fan	stay	32	3
fully	recover	coronavirus	32	3
pay	cut	help	32	3
madrid	president	die	32	3
pay	cut	player	32	3
deadline	decision	game	32	3
decision	game	amid	32	3
azerbaijan	grand	prix	32	3
boxer	anthony	yarde	32	3
fourth	time	six	32	3
olympic	cancel	coronavirus	31	3
grand	prix	due	31	3
premier	league	face	31	3
postpone	health	concern	31	3
coronavirus	sport	update	31	3
japanese	prime	minister	31	3
premier	league	ditch	31	3
key	question	answer	31	3
tell	premier	league	31	3
medicine	advisory	committee	31	3
olympic	postpone	due	31	3
arsenal	postpone	coronavirus	31	3
suspend	indefinitely	due	31	3
suspend	season	due	31	3
season	suspend	indefinitely	31	3
shut	down	due	31	3
man	city	star	31	3
premier	league	resume	31	3
sky	sport	subscription	31	3
ufc	president	dana	31	3
sport	coronavirus	wayne	31	3
help	supply	ventilator	31	3
result	coronavirus	crisis	31	3
goalkeeper	rustu	recber	31	3
wwe	deem	essential	31	3
call	inquiry	cheltenham	31	3
inquiry	cheltenham	festival	31	3
fifa	medical	chair	31	3
sport	face	mask	30	3
national	sport	festival	30	3
minister	sport	vincenzo	30	3
sport	vincenzo	spadafora	30	3
coronavirus	outbreak	affect	30	3
coronavirus	crisis	sport	30	3
close	door	game	30	3
match	postpone	due	30	3
amid	fear	coronavirus	30	3
league	title	season	30	3
premier	league	team	30	3
bahrain	vietnam	grand	30	3
follow	coronavirus	outbreak	30	3
league	game	play	30	3
italy	suspend	least	30	3
live	coronavirus	late	30	3
year	japan's	olympic	30	3
dcfc	dcfcfans	coronavirus	30	3
positive	coronavirus	bbc	30	3
boss	jurgen	klopp	30	3
continue	behind	close	30	3
north	west	200	30	3
ban	sport	fixture	30	3
league	club	announce	30	3
september	due	coronavirus	30	3
ongoing	coronavirus	pandemic	30	3
conor	mcgregor	call	30	3
pandemic	bbc	sport	30	3
age	contract	coronavirus	30	3
brooklyn	net	player	30	3
help	coronavirus	pandemic	30	3
abramovich	pay	staff	30	3
urge	people	stay	30	3
lewandowski	give	euro	30	3
give	euro	fight	30	3
premier	league	restart	30	3
bbc	sport	pep	30	3
sport	england	announce	30	3
community	sport	physical	30	3
host	sex	party	30	3
deem	essential	service	30	3
france	ahead	end	30	3
end	august	coronavirus	30	3
coronavirus	sport	danish	30	3
cheltenham	festival	decision	30	3
fixture	amid	coronavirus	29	3
sport	six	nation	29	3
suspend	sport	event	29	3
rugby	union	news	29	3
continue	impact	sport	29	3
europa	league	clash	29	3
hit	hard	coronavirus	29	3
football	league	club	29	3
indian	well	cancel	29	3
coronavirus	sport	late	29	3
red	bull	boss	29	3
league	ditch	pre-match	29	3
euro	2020	postponement	29	3
grand	prix	three	29	3
prix	three	team	29	3
tokyo	2020	chief	29	3
sport	coronavirus	australian	29	3
jazz	player	test	29	3
real	madrid	player	29	3
defender	daniele	rugani	29	3
2020	postpone	year	29	3
rugby	football	league	29	3
wage	amid	coronavirus	29	3
bbc	sport	liverpool	29	3
ncaa	division	council	29	3
portsmouth	player	test	29	3
coronavirus	relief	effort	29	3
fund	available	help	29	3
club	announce	player	29	3
club	commit	complete	29	3
sport	danish	club	29	3
danish	club	plan	29	3
medical	chair	restart	29	3
match	due	coronavirus	28	3
international	sport	event	28	3
serie	match	postpone	28	3
home	amid	coronavirus	28	3
football	contact	sport	28	3
staff	member	test	28	3
coronavirus	cancel	sport	28	3
event	cancel	coronavirus	28	3
sport	event	italy	28	3
indian	well	tennis	28	3
nottingham	forest	fan	28	3
marathon	postpone	due	28	3
liverpool	boss	jurgen	28	3
stay	home	coronavirus	28	3
tokyo	2020	postponement	28	3
coronavirus	man	utd	28	3
premier	league	release	28	3
kylian	mbappe	test	28	3
world	title	fight	28	3
manchester	unite	player	28	3
super	league	club	28	3
league	euro	2020	28	3
test	player	coronavirus	28	3
postpone	premier	league	28	3
grant	extra	year	28	3
claim	premier	league	28	3
follow	coronavirus	pandemic	28	3
coronavirus	national	league	28	3
coronavirus	west	ham	28	3
family	member	die	28	3
trump	extend	travel	28	3
brazil	president	jair	28	3
affect	coronavirus	pandemic	28	3
coronavirus	pandemic	affect	28	3
club	coronavirus	crisis	28	3
dutch	spanish	monaco	28	3
pay	staff	sleep	28	3
place	non-playing	staff	28	3
pay	matchday	staff	28	3
pay	cut	staff	28	3
lorenzo	sanz	former	28	3
van	der	burgh	28	3
guardiola	donate	million	28	3
maurizio	sarri	agree	28	3
195	million	fund	28	3
coronavirus	liverpool	atletico	28	3
august	coronavirus	delay	28	3
bottom	top	down	28	3
nation	clash	italy	27	3
axe	due	coronavirus	27	3
wale	scotland	six	27	3
scotland	six	nation	27	3
coronavirus	scottish	football	27	3
tour	cancel	two	27	3
nation	match	against	27	3
positive	coronavirus	sport	27	3
season-opening	australian	grand	27	3
free	bet	coronavirus	27	3
stop	spread	coronavirus	27	3
staff	test	positive	27	3
zara	phillips	self-isolate	27	3
tokyo	2020	game	27	3
italy	postpone	due	27	3
call	off	amid	27	3
ban	sport	event	27	3
special	report	world	27	3
grand	prix	fan	27	3
ditch	pre-match	fair-play	27	3
grand	prix	become	27	3
article	title	afl	27	3
far	notice	due	27	3
postponement	due	coronavirus	27	3
season	far	notice	27	3
arsenal	player	staff	27	3
prime	minister	boris	27	3
liverpool	premier	league	27	3
t20	world	cup	27	3
premier	league	suspension	27	3
bahrain	vietnam	race	27	3
sorry	sport	schedule	27	3
sport	schedule	change	27	3
schedule	change	due	27	3
change	due	postpone	27	3
due	postpone	game	27	3
postpone	game	cause	27	3
game	cause	covid	27	3
coronavirus	welsh	rugby	27	3
efl	suspend	england	27	3
scotland	off	coronavirus	27	3
live	news	trump	27	3
player	return	train	27	3
national	league	club	27	3
wage	cut	coronavirus	27	3
sadio	mane	make	27	3
japan	still	plan	27	3
player	take	wage	27	3
british	box	board	27	3
sport	coronavirus	crisis	27	3
staff	due	coronavirus	27	3
agree	per	cent	27	3
wage	deferral	coronavirus	27	3
virtual	grand	national	27	3
sport	development	peace	27	3
unite	legend	norman	27	3
essential	service	florida	27	3
club	plan	football	27	3
plan	football	drive-in	27	3
coronavirus	lockdown	superb	27	3
start	again	bottom	27	3
hit	coronavirus	epidemic	26	3
coronavirus	crisis	talk	26	3
coronavirus	end	season	26	3
due	coronavirus	read	26	3
dele	alli	charge	26	3
via	belfast	telegraph	26	3
next	two	week	26	3
self-isolate	italy	trip	26	3
championship	cancel	due	26	3
league	match	play	26	3
news	coronavirus	tokyo	26	3
least	april	due	26	3
pre-match	fair-play	handshake	26	3
coronavirus	bbc	news	26	3
test	positive	virus	26	3
league	club	lose	26	3
2020	postpone	due	26	3
football	match	play	26	3
due	covid-19	crisis	26	3
manchester	even	news	26	3
next	few	day	26	3
team	member	self-isolation	26	3
uefa	postpone	euro	26	3
read	funny	meme	26	3
suspend	champion	league	26	3
spring	sport	season	26	3
down	due	coronavirus	26	3
declare	state	emergency	26	3
amid	ongoing	coronavirus	26	3
live	update	justin	26	3
league	coronavirus	meet	26	3
news	coronavirus	formula	26	3
brighton	chief	executive	26	3
late	update	question	26	3
update	trump	extend	26	3
eligibility	spring-sport	athlete	26	3
coronavirus	pandemic	full	26	3
football	england	suspend	26	3
travel	ban	ireland	26	3
2020	postpone	2021	26	3
sport	coronavirus	gary	26	3
olympic	game	plan	26	3
irresponsible	ioc	member	26	3
olympic	organiser	respond	26	3
staff	fight	coronavirus	26	3
coronavirus	japan	still	26	3
still	plan	complete	26	3
