# Supplementary material for: The Impact of COVID-19 on Sport in Twitter: A Quantitative and Qualitative Content Analysis
Source: Int J Environ Res Public Health. 2021 Apr 25;18(9):4554. doi: 10.3390/ijerph18094554 (PMC8123335; doi:10.3390/ijerph18094554)
Supplement: Supplementary file 1 [file ijerph-18-04554-s001.zip › Table S2_centrality values.xlsx]

## Sheet: Sheet1
G.Nodes.Name	pg_ranks	auth_ranks	in_deg_centrality	weight_in_deg_centrality	incloseness_centrality
@MailOnline Sport	0.0194291	0.696837	302	458	3.3129e-06
@Sport England	0.0166535	0.000895765	267	388	3.0554e-06
@BBC Sport	0.00994113	0.0284855	175	211	2.41465e-06
@Premier League	0.00668441	0.00170082	133	211	1.3947e-06
@Daily Mail Online	0.00625975	0.0177157	100	132	1.26034e-06
@Daily Record Sport	0.00625975	1.82542e-06	95	112	1.34057e-06
@Donald J. Trump	0.00596428	6.35314e-05	94	100	1.47e-06
@Sky Sports	0.00522166	0.000477254	80	84	1.26754e-06
@Metro Sport	0.00518869	0.0134049	83	110	1.04189e-06
@Guardian sport	0.00454188	0.00407334	78	86	1.17693e-06
@NCAA	0.0042678	5.8824e-06	63	65	1.01585e-06
@Piers Morgan	0.00388195	0.000358531	65	66	1.06498e-06
@BT Sport	0.00380863	0.000312152	58	69	8.15654e-07
@NRL	0.00377295	0.00014471	71	119	6.7676e-07
@Formula 1	0.00367785	0.00374237	71	92	9.11568e-07
@The Sydney Morning Herald	0.0034804	0.00310838	60	71	8.43538e-07
@news.com.au	0.00337093	0.000108302	51	58	7.46058e-07
@Telegraph Sport	0.00316774	1.62058e-05	51	58	7.46058e-07
@The Guardian	0.00297915	5.80468e-05	46	47	7.48994e-07
@Gary Neville	0.00282041	0.000111231	46	48	7.3339e-07
