# Supplementary material for: The Impact of COVID-19 on Sport in Twitter: A Quantitative and Qualitative Content Analysis
Source: Int J Environ Res Public Health. 2021 Apr 25;18(9):4554. doi: 10.3390/ijerph18094554 (PMC8123335; doi:10.3390/ijerph18094554)
Supplement: Supplementary file 1 [file ijerph-18-04554-s001.zip › Table S3_top_word_topic_LDA.xlsx]

## Sheet: Sheet1
Topic_1	Score_1	Topic_2	Score_2	Topic_3	Score_3	Topic_4	Score_4	Topic_5	Score_5	Topic_6	Score_6	Topic_7	Score_7	Topic_8	Score_8	Topic_9	Score_9	Topic_10	Score_10	Topic_11	Score_11	Topic_12	Score_12	Topic_13	Score_13	Topic_14	Score_14	Topic_15	Score_15	Topic_16	Score_16	Topic_17	Score_17	Topic_18	Score_18	Topic_19	Score_19	Topic_20	Score_20	Topic_21	Score_21	Topic_22	Score_22	Topic_23	Score_23	Topic_24	Score_24	Topic_25	Score_25
league	2.81646	make	0.392485	get	0.509104	people	0.486272	new	0.42026	train	0.596693	cancel	1.25978	health	0.561424	suspend	1.17054	face	0.416655	athlete	0.820101	real	0.473619	week	0.511513	olympic	1.80172	postpone	0.90692	late	1.24591	club	0.692372	season	1.02663	question	0.284117	player	1.29578	fan	0.373339	down	0.981931	player	0.470744	man	1.19213	test	3.00785
premier	1.84233	good	0.306427	just	0.293713	take	0.333917	nrl	0.320483	player	0.385824	event	1.05867	measure	0.245371	football	0.923603	crisis	0.385456	stay	0.372477	get	0.297812	social	0.370089	2020	1.24178	due	0.622284	update	1.06505	help	0.675028	league	0.85409	red	0.2746	pay	1.09951	cheltenham	0.283069	shut	0.596628	show	0.368279	city	0.864582	positive	1.95802
season	0.531706	time	0.297245	good	0.280385	get	0.308249	title	0.267993	lockdown	0.376857	world	0.860385	new	0.234373	season	0.725229	football	0.352005	home	0.346463	play	0.285573	day	0.354528	tokyo	1.04848	six	0.589517	news	0.860359	fund	0.458851	news	0.598001	make	0.271232	cut	1.09361	off	0.26251	golf	0.392352	symptom	0.35675	manchester	0.630286	player	0.807931
champion	0.417335	like	0.238877	think	0.279206	just	0.223763	pandemic	0.242168	ban	0.373746	due	0.707617	case	0.226457	due	0.580901	ranger	0.230922	keep	0.302348	madrid	0.271884	next	0.267307	postpone	0.730682	nation	0.581256	live	0.838119	support	0.431232	rugby	0.552297	amp	0.208675	take	0.952843	festival	0.259044	story	0.324003	ronaldo	0.264672	unite	0.495434	liverpool	0.607568
club	0.412884	know	0.200069	know	0.258595	time	0.212714	hit	0.209205	return	0.359208	cup	0.530114	south	0.221596	outbreak	0.509825	impact	0.178824	amp	0.275475	president	0.268504	distance	0.212932	game	0.65081	game	0.575042	please	0.408963	community	0.368588	club	0.548437	tell	0.193116	staff	0.791157	box	0.236059	open	0.301573	notice	0.25799	message	0.408259	arsenal	0.549316
efl	0.393045	look	0.185395	watch	0.249905	look	0.212522	afl	0.203463	fan	0.324483	pandemic	0.468067	government	0.219753	italy	0.375463	talk	0.172374	spring	0.251255	well	0.24236	two	0.203503	euro	0.343577	off	0.505864	contact	0.343777	new	0.352655	football	0.49994	live	0.193105	wage	0.58936	call	0.21217	future	0.254507	far	0.253726	star	0.387327	arteta	0.425614
meet	0.342412	why	0.182056	every	0.229891	way	0.188188	effect	0.177732	football	0.28687	postpone	0.372588	body	0.189318	april	0.330929	financial	0.171034	year	0.212823	still	0.174756	medium	0.17315	2021	0.338151	italy	0.408059	full	0.337356	activity	0.349417	premier	0.359623	boris	0.162495	club	0.388943	ticket	0.166019	top	0.234017	star	0.232681	utd	0.362979	mikel	0.390028
uefa	0.337391	right	0.175314	feel	0.219364	stay	0.18513	impact	0.171163	stadium	0.269686	wimbledon	0.263645	public	0.17541	serie	0.321966	big	0.159243	ncaa	0.210075	former	0.168524	month	0.160781	due	0.333232	match	0.372507	thank	0.33152	million	0.305652	end	0.353929	answer	0.151919	agree	0.300305	sign	0.159855	footballer	0.224502	west	0.22265	send	0.33932	kenny	0.23272
suspend	0.28	read	0.167535	like	0.201594	think	0.177682	lewis	0.169674	amp	0.264843	affect	0.260316	death	0.165371	game	0.321482	deal	0.151528	great	0.206512	basketball	0.153489	last	0.153438	postponement	0.254044	ireland	0.342669	story	0.300387	announce	0.218232	chief	0.345917	press	0.149697	crisis	0.293934	time	0.143157	world	0.216824	cristiano	0.204879	mufc	0.282449	confirm	0.221711
forest	0.273582	really	0.167319	people	0.176972	home	0.157633	hamilton	0.168335	play	0.235733	major	0.258242	mental	0.163103	end	0.248561	shutdown	0.147479	school	0.161714	tennis	0.140014	amp	0.119382	ahead	0.247959	outbreak	0.325056	transfer	0.294548	england	0.213826	noticias	0.276458	sense	0.144151	furlough	0.28547	last	0.133025	stand	0.190717	isolation	0.184312	fight	0.237106	title	0.21328
[truncated: 10 more columns]
